1 **Biodynamics: A novel quasi-first principles theory on the fundamental mechanisms of**  
2 **cellular function/dysfunction and the pharmacological modulation thereof**

3

4 Gianluca Selvaggio<sup>1\*</sup> and Robert A. Pearlstein<sup>1\*</sup>

5 <sup>1</sup>Global Discovery Chemistry, Computer-Aided Drug Discovery, Novartis Institutes for  
6 BioMedical Research, 181 Massachusetts Avenue, Cambridge, MA 02139, USA.

7

8 \*Corresponding authors

9 E-mail: [gianluca.selvaggio@gmail.com](mailto:gianluca.selvaggio@gmail.com)

10 E-mail: [robert.pearlstein@novartis.com](mailto:robert.pearlstein@novartis.com)

11

12 Key words: dynamic occupancy; non-equilibrium binding; binding kinetics; dynamic counter-  
13 balancing; analog computing; cellular function

14 **ABSTRACT**

15 Cellular function depends on heterogeneous dynamic intra-, inter-, and supramolecular structure-  
16 function relationships. However, the specific mechanisms by which cellular function is  
17 transduced from molecular systems, and by which cellular dysfunction arises from molecular  
18 dysfunction are poorly understood. We proposed previously that cellular function manifests as a  
19 molecular form of analog computing, in which specific time-dependent state transition fluxes  
20 within sets of molecular species (“molecular differential equations” (MDEs)) are sped and  
21 slowed in response to specific perturbations (inputs). In this work, we offer a theoretical  
22 treatment of the molecular mechanisms underlying cellular analog computing (which we refer to  
23 as “biodynamics”), focusing primarily on non-equilibrium (dynamic) intermolecular state  
24 transitions that serve as the principal means by which MDE systems are solved (the molecular  
25 equivalent of mathematical “integration”). Under these conditions, bound state occupancy is  
26 governed by  $k_{on}$  and  $k_{off}$ , together with the rates of binding partner buildup and decay.  
27 Achieving constant fractional occupancy over time depends on: 1) equivalence between  $k_{on}$  and  
28 the rate of binding site buildup); 2) equivalence between  $k_{off}$  and the rate of binding site decay;  
29 and 3) free ligand concentration relative to  $k_{off}/k_{on}$  ( $n \cdot K_d$ , where  $n$  is the fold increase in  
30 binding partner concentration needed to achieve a given fractional occupancy). Failure to satisfy  
31 these conditions results in fractional occupancy well below that corresponding to  $n \cdot K_d$ . The  
32 implications of biodynamics for cellular function/dysfunction and drug discovery are discussed.

33

34

35

## 36 INTRODUCTION

37 We proposed in our previous work [1] that time-dependent cellular function is derived from a  
38 molecular form of analog computing [2,3], in which sets of coupled ordinary differential equations  
39 and their integral solutions are modeled physically by changes in the rates of buildup and decay  
40 among the populations of biomolecular species to/from specific intra- and intermolecular states  
41 (the hardware and software are one and the same) (Fig 1). We referred to these constructs as  
42 “molecular differential equations” (MDEs) [1], the major forms of which include:

### 43 **Intramolecular:**

$$\frac{d\gamma_i(t)}{dt} = k_{in} \cdot [\textit{species } i_{state m}](t) - k_{out} \cdot [\textit{species } i_{state n}](t) \quad (1a)$$

### 44 **Non-covalent intermolecular:**

$$\frac{d\gamma_{i-j}(t)}{dt} = k_{on} \cdot [\textit{free species } i](t) - k_{off} \cdot [\textit{free species } j](t) \quad (1b)$$

### 46 **Enzyme-substrate:**

$$\frac{d\gamma_{i-j}(t)}{dt} = k_{on} \cdot [\textit{free enzyme } i](t) \cdot [\textit{free substrate } j](t) - k_{off} \cdot [\textit{enzyme } i - \textit{sub} ](t) - k_{cat} \cdot [\textit{enzyme } i - \textit{substrate } j](t) \quad (1c)$$

47  
48 where  $d\gamma_k(t)/dt$  represents the rates of non-equilibrium occupancy buildup and decay of state  $k$   
49 from one or more predecessor to one or more successor states. State transition rates are governed  
50 by adjustable barriers originating from intra- or intermolecular interactions (which we referred to  
51 as “intrinsic rates”) and time-dependent changes in the concentrations or number densities of the  
52 participating species (which we referred to as “extrinsic rates”) [1]. Molecular populations “flow”

53 over time in a transient (Markovian) fashion from one specific structural state to another (Fig 1)  
54 in response to production/degradation or translocation-driven changes in the levels of the  
55 participating species.

56 Fig 1. (A) Markovian state transition behavior exemplified for the human cardiac ether-a-  
57 go-go related gene (hERG) potassium channel between closed (C1, C2, and C3), open (O)  
58 and inactivated states (I) underlying the state probability curves in (B) [4]. The rate  
59 constants are labeled with Greek letters. (B) Molecular populations of hERG “flow” from  
60 one specific state to another based on intrinsic voltage-dependent rates of entry and exit.  
61 Multiple fluxes occur in parallel between specific states, speeding and slowing in response  
62 to dynamic perturbations. For example, the open (orange) and inactive (blue) states are fed  
63 by the closed state (magenta); the open and closed states are fed by the inactive state; and  
64 the inactive and closed states are fed by the open state. The time-dependent output of the  
65 overall system (i.e. the membrane potential in this case) is solved in cardiomyocytes via  
66 integration of the full complement of sodium, potassium, and calcium ion channel MDEs  
67 (which can be simulated using the O’Hara-Rudy model of the human cardiac AP [5]).

68 MDEs are “solved” by cells in aggregate for the corresponding time-dependent state occupancies  
69 of the participating species  $\{\gamma_k(t), k = 1, n\}$  (e.g. dynamic ion channel states and currents, dynamic  
70 enzyme activation states, etc.), together with higher order (convergent) properties that we refer to  
71 as  $\Gamma_a(t)$  (Fig 2).  $\{\gamma_k(t), k = 1, n\}$  and  $\Gamma_a(t)$  manifest as transient stimulus-response-driven “action  
72 potential-like” waveforms, in which the intrinsic or extrinsic rates of one or more MDEs are sped  
73 or slowed in response to  $\Gamma_a(t)$ . [1].

74 Fig 2. Cellular analog computing is based on the transduction of molecular state transitions  
75 into cellular function. MDEs  $\{d\gamma_k(t)/dt, k = 1, n\}$  are “solved” in aggregate for the  
76 corresponding time-dependent state occupancies of the participating species  $\{\gamma_k(t), k = 1,$   
77  $n\}$  (e.g. dynamic intra- and intermolecular states), together with higher order properties  
78 that we refer to as  $\Gamma_a(t)$ . The underlying MDEs accelerate or decelerate recursively in  
79 response to  $\Gamma_a(t)$  according to their specific response mechanisms.

80 Building on our previous work [1] and that of others [2,6–11], we have developed a  
81 comprehensive multi-scale (atomistic  $\rightarrow$  molecular systems) first principles theory on the basic  
82 mechanisms of cellular function that we refer to as “biodynamics” (Fig 3).

83 Fig 3. The six branches of biodynamics theory, which span the intra-/peri-cellular (micro-  
84 cellular) and macro-cellular levels (see text). Such processes can be simulated using multi-  
85 scale modeling approaches, ranging from atomistic molecular dynamics-based [1] to  
86 “atom-less” time-dependent ODE-based simulations (“MDE mimetics”) [1].

87 Our theory encompasses the major mechanisms by which:

- 88 1) MDEs are generated, powered, solved (integrated), and transduced into function at the  
89 micro- and macro-cellular levels.
- 90 2) Cellular dysfunction results from molecular dysfunction and alterations in the  
91 corresponding MDEs and  $\Gamma_a(t)$ .
- 92 3) Cellular dysfunction can be mitigated by exogenously applied MDEs, consisting of drug-  
93 target occupancy.

94 In our previous work, we described the putative mechanisms by which free energy is transduced  
95 into non-equilibrium conditions and kinetic barriers (i.e. which we refer to here as “energy  
96 dynamics”) [1,4,12–15], and exemplified cellular computing by way of the cardiac AP [4] and a  
97 generic MAP kinase-phosphatase system [1]. Here, we focus on binding as a key “integrator” of  
98 MDE systems, and in particular, the specific implications of non-equilibrium conditions on  
99 occupancy of the bound states of both endogenous molecules and drugs (i.e. the interplay between  
100 the “molecular dynamics” and “binding dynamics” branches of our theory).

101 ***Biodynamics both promotes and exploits non-equilibrium conditions***

102 Rapid, transient perturbation-induced responses underlying cellular function depend on open  
103 systems, in which mass (chemical precursors, degradation products, and other substances) and  
104 energy are exchanged to/from the extracellular volume. Such responses are dampened by  
105 reversibility in closed systems exhibiting mass and energy conservation, noting that some species  
106 may undergo slow rates of buildup and decay when the overall response rate is slow. In the  
107 classical equilibrium view, covalent or non-covalent states  $i$  and  $j$  are populated according to their  
108 free energy differences ( $\{\Delta G_{ij}\}$ ), such that the total free energy of the system is minimized.  
109 Dynamic state transitions of the participating species necessarily depend on perturbation-re-  
110 equilibration under this scenario, which is subject to the following limitations:

- 111 1) Perturbation-induced re-equilibration (i.e. equilibrium 1  $\rightarrow$  equilibrium 2) is time-  
112 consuming, and therefore, poorly suited for rapid biological responses.
- 113 2) Optimization of complex equilibria is cumbersome and offers extremely limited  
114 evolutionary adaptability.

115 Molecular systems are displaced from equilibrium (analogous to strain) when the participating  
116 species are continuously produced and degraded or translocated [16–21] (analogous to stress).

117 Fig 4. Molecular species and states build and decay transiently (i.e. sources  $\rightarrow$  sinks),  
118 thereby generating non-equilibrium conditions. Such conditions promote unidirectional  
119 fluxes on which cellular analog computing is based.

120 The resulting strain energy is proportional to the stress, analogous to that of a spring stretched  
121 away from its equilibrium state. Reversibility (e.g.  $A + B \rightleftharpoons AB$ ) is circumvented by “tensioned”  
122 operation, in which  $\Delta G$  is maintained permanently above zero via chemical or physical entry and  
123 exit of the species to/from the system over time (sources and sinks) (Fig 4). The potential energy  
124 of a system under such conditions ( $\Delta G_{noneq}$ ) is given by:

$$\Delta G_{noneq} = G_{strain} - G_{eq} \quad (2)$$

125  
126 where  $G_{strain}$  is the strain energy, and  $G_{eq}$  is the equilibrium free energy. Strained systems relax  
127 via mass action upon release of the corresponding stress, wherein  $\Delta G_{noneq} \rightarrow 0$ , and the  
128 participating species transition toward their equilibrium state distributions (i.e.  $[\text{species } A_{state \ i}]/[\text{species } A_{state \ j}] = K_{eq}$ ). Reversibility is conveyed indirectly through concurrent (but out-of-  
129 phase) buildup and decay processes (e.g.  $A + B \rightarrow AB$ ;  $AB + C \rightarrow A + B + C$ ), which we refer to  
130 as “dynamic counter-balancing” (“Ying-Yang”) (Figs 2 and 5). Examples include kinase- versus  
131 phosphatase-mediated phospho-transfer and inward versus outward ion channel currents.  
132

133 Fig 5(A). Buildup and decay of a Yin (typically an enzyme), together with its substrate,  
134 product (and substrates thereof), Yang across their accessible states, as depicted by a  
135 plumbing system consisting of pipes, vessels, and valves. A given function-generating  
136 system is constituted from an interdependent collection of  $m$  such systems. Each system is

137 maintained at non-equilibrium (analogous to “pressurization”) via continuous inputs and  
138 outputs of molecular species (“fluxes”). The dynamic fluid levels within the  $(n \cdot m)$   
139 member vessels of the overall system, which define its instantaneous state, are solved by  
140 integration of the  $m$  MDE collections ( $\{d\gamma_k(t)/dt = \text{rate of entry to state } k - \text{rate of exit}$   
141  $\text{from state } k\}_i$ , where  $k = 1, 2, 3, \dots, n$ , and  $i = 1, 2, 3, \dots, m$ ). The vessels may be connected  
142 in series or parallel. The flow rates to/from each vessel depend on the input and output  
143 valve settings (representing both the intrinsic and extrinsic free energy barriers in this  
144 simplified example), which are governed by the overall state of the system (constituting a  
145 feedback loop). (B) Dynamic counter-balancing prevents runaway exponential growth and  
146 decay of molecular species and state levels. The rates of buildup and decay consist of the  
147 net difference in Yin and Yang rates over time. The Yin-Yang balance is tipped toward the  
148 Yin during the buildup phase (left side of the blue curve) and toward the Yang during the  
149 decay phase (right side of the blue curve). The absolute rates of species or state level  
150 changes are irrelevant, except in cases where runaway behavior is functionally desirable  
151 (e.g. caspase activation). The overall buildup-decay cycle length is denoted as  $\Lambda$ , noting  
152 that long lived species or states likely result from slow decay rather than slow buildup  
153 (which would otherwise dampen the maximum level). Fast buildup has important  
154 implications for bound state occupancy, which are discussed later in the text.

155 The Yin-Yang architecture serves to:

- 156 1) Prevent over- and undershooting desired  $\gamma_k(t)$  due to the exponential behavior of  
157 molecular processes (noting that the integral solutions of MDEs are exponential  
158 functions). Yins and Yangs are necessarily maintained in an out-of-phase relationship by



159 way of “clocking” (e.g. a phosphatase whose activation depends on a species whose  
160 buildup lags behind its target kinase).

161 2) Restore the initial conditions of the system.

162 The widespread practice of measuring biochemical (and even cellular and *in vivo*) effects as a  
163 function of free ligand concentration, rather than occupancy per se, reflects the extent to which the  
164 equilibrium assumption is relied upon throughout the biological sciences. However, our results  
165 suggest that time-independent equilibrium metrics of state occupancy are poor approximations to  
166 actual occupancy under cellular conditions *in vivo* when the rates of binding partner buildup and  
167 decay are fast.

## 168 MATERIALS AND METHODS

169 We derived two complementary analytical expressions capturing the simultaneous exponential  
170 buildup and decay of the binding site (molecular dynamics) and bound state (binding dynamics)  
171 based on a simplified second order non-competitive interaction scheme:

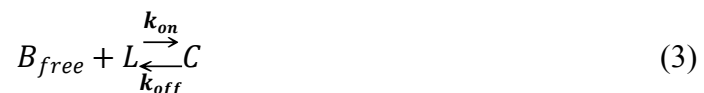

172 where  $k_{on}$  is the association rate constant,  $k_{off}$  is the dissociation rate constant, and  $B_{free}$ ,  $C$ , and  
173  $L$  are the free binding site, free ligand, and bound state concentrations, respectively. The rate of  
174 change of  $C$  (the mathematical equivalent of a binding MDE) is given by:  
175

$$\frac{dC(t)}{dt} = k_{on} \cdot B_{free}(t) \cdot L - k_{off} \cdot C(t) \quad (4a)$$

176

177 Solution of this equation is facilitated by the following assumptions:

178 1) Molecular response is proportional solely to dynamic fractional occupancy, which in some  
179 cases, may depend additionally on the binding mode (e.g. agonist, partial agonist, inverse  
180 agonist, and antagonist in the case of receptors).

181 2) The total binding site level ( $B_{total}(t)$ ) is conserved instantaneously, wherein:

$$B_{free}(t) = B_{total}(t) - C(t) \quad (4b)$$

182

183 Substituting  $B_{free}(t)$  in equation 4a with equation 4b leads to:

$$\frac{dC(t)}{dt} = k_{on} \cdot (B_{total}(t) - C(t)) \cdot L - k_{off} \cdot C(t) \quad (5)$$

184 3) That cellular systems operate in the transient regime, in which state population levels build  
185 and decay cyclically over time (although quasi-equilibrium operation is possible in some  
186 cases).

187 4) Buildup of  $B_{total}(t)$  consists of the separate synthesis of the biomolecule (typically a  
188 protein) and generation of its binding-competent structural state. We further assume that  
189 state transitions occur on a timescale  $\geq$  the rate of synthesis of the binding site-containing  
190 species.

191 5) Both free and ligand-bound binding sites are lost during degradation, whereas, in practice,  
192 different rates of degradation of the bound and unbound states are possible.

193 6)  $B_{total}(t)$  builds and decays exponentially via two distinct processes:

194 a) Production and degradation of the binding site-containing species, or inter-  
195 compartmental transfer to/from the site of action, whichever is slower.

196 b) Formation and loss of the binding competent structural state.

197 7) That  $B_{total}(t)$  builds to the equilibrium level ( $B_{\infty}$ ) at  $t = \infty$ .

198 8) That buildup and decay can be treated as separate sequential processes. Although  $B_{total}(t)$   
199 builds and decays simultaneously, net buildup occurs prior to  $B_{\infty}$ , followed by net decay.  
200 Possible forms of the buildup term include exponential growth (equation 6a), positive  
201 exponential decay (equation 6b), or logistic growth (equation 6c). Possible forms of the  
202 decay term include exponential (equation 6d) or logistic (equation 6e) decay (multiphasic  
203 exponential growth and decay behaviors are also conceivable):

$$\text{Buildup } B_{total}(t) = B_{\infty} \cdot (e^{k_i \cdot t} - 1); t < \xi \quad (6a)$$

$$B_{total}(t) = B_{\infty} \cdot (1 - e^{-k_i \cdot t}); t < \xi \quad (6b)$$

$$B_{total}(t) = \frac{B_{\infty}}{(1 + e^{-k_i \cdot (t - t_{01})})}; t < \xi \quad (6c)$$

204

$$\text{Decay } B_{total}(t) = B_{\infty} \cdot e^{-k_{-i} \cdot (t - \xi)}; t \geq \xi \quad (6d)$$

$$B_{total}(t) = B_{\infty} \cdot \left(1 - \frac{1}{(1 + e^{-k_{-i} \cdot (t - t_{02})})}\right); t \geq \xi \quad (6e)$$

205

206 where  $B_{\infty}$  is  $B_{total}$  at  $t = \infty$ ,  $k_i$  and  $k_{-i}$  are the buildup and decay rate constants, respectively,

207  $\xi$  is a characteristic time at which the function switches from net buildup to net decay, and

208  $t_{01}$  and  $t_{02}$  are the times at which the logistic curves reach 50% of their dynamic range

209 during buildup and decay, respectively. We chose to approximate the buildup and decay

210 phases of the binding site-containing species using equations 6b (based on [22]) and 6d,

211 and the buildup and decay phases of the binding site using equations 6c and 6e, which  
 212 roughly approximates the state probability curves shown in Figs 1B and 2A.

213 9)  $k_{-i}$  defines the lower limit of  $k_{off}$  (i.e.  $k_{off}$  is “hijacked” by the rate of binding site decay),  
 214 necessitating the correction of  $k_{off}$  and  $K_d$  in cases where  $k_{off} < k_{-i}$ :

$$215 \quad k'_{off} = k_{off} \text{ (where } k_{off} > k_{-i} \text{)} \mid k_{-i} \text{ (where } k_{off} \leq k_{-i} \text{)}$$

$$216 \quad K'_d = k'_{off} / k_{on}$$

217 10)  $L$  is fixed at a constant concentration ( $L_0$ ). In practice,  $L$  is expected to build and decay  
 218 dynamically, which serves to further constrain the buildup of the bound state.

### 219 ***Scenario 1: putative production and degradation of binding site-containing species***

220 Substituting equations 6b and 6d into equation 5 leads to:

$$\begin{cases} \frac{dC(t)}{dt} = k_{on} \cdot B_{\infty} \cdot L_0 \cdot (1 - e^{-k_i \cdot t}) - C(t) \cdot (k_{on} \cdot L_0 + k'_{off}) & t < \xi \\ \frac{dC(t)}{dt} = k_{on} \cdot B_{\infty} \cdot L_0 \cdot e^{-k_{-i} \cdot (t - \xi)} - C(t) \cdot (k_{on} \cdot L_0 + k'_{off}) & t \geq \xi \end{cases} \quad (7)$$

221  
 222 where  $\xi$  is the time required to reach equilibrium binding (conventionally referred to as the  
 223 “settling time”). The net flux switches from buildup to decay at this time.  $\xi$  is defined  
 224 conventionally as the time to reach  $0.95 \cdot B_{\infty}$  (which we refer to as  $B_{max}$ ), given that  $B_{\infty}$  is only  
 225 asymptotically reached over long time periods [22], whereas  $B_{max}$  is reached over finite times.

226 Solving for  $t_{settling}$  leads to:

$$B_{max} = B_{0.95} = B_{\infty} \cdot (1 - e^{-k_i \cdot t_{settling}}) \quad (8a)$$

$$0.95 = 1 - e^{-k_i \cdot t_{settling} \rightarrow \xi} = t_{settling} = -\ln \frac{(0.05)}{k_i} \cong \frac{3}{k_i} \quad (8b)$$

227

228 Equation 7 can be recast in dimensionless form to facilitate parameter-independent occupancy

229 comparison, reduce the dimensionality of the system, and allow grouping of the rate terms:

$$\begin{cases} \frac{dc(\tau)}{d\tau} = \alpha \cdot (1 - e^{-\tau}) - c(\tau) \cdot (\alpha + \beta) & \tau < \bar{\xi} \\ \frac{dc(\tau)}{d\tau} = \alpha \cdot e^{-\gamma \cdot (\tau - \bar{\xi})} - c(\tau) \cdot (\alpha + \beta) & \tau \geq \bar{\xi} \end{cases} \quad (9)$$

230

231 where  $c = \frac{C}{B_{max}}$ ,  $\tau = (k_i \cdot t)$ ,  $\alpha = \frac{k_{on} \cdot L_0}{k_i}$ ,  $\beta = \frac{k_{off}}{k_i}$ ,  $\gamma = \frac{k_{-i}}{k_i}$ , and  $\bar{\xi} = 3$ . Solving equation 9 for  $c(\tau)$

232 leads to:

$$\begin{cases} c(\tau) = \frac{\alpha \cdot e^{\lambda_1 \cdot \tau}}{(\alpha + \beta) \cdot (\alpha + \beta - 1)} - \frac{\alpha \cdot e^{\lambda_2 \cdot \tau}}{\alpha + \beta - 1} + \frac{\alpha \cdot e^{\lambda_3}}{\alpha + \beta} & \tau < \bar{\xi} & (10a) \\ c(\tau) = \frac{0.95 \cdot c_{\infty}}{\alpha + \beta - 1} \cdot e^{-(\alpha + \beta) \cdot (\tau - \bar{\xi})} \cdot (\alpha \cdot e^{(\alpha + \beta - \gamma) \cdot (\tau - \bar{\xi})} + \beta - \gamma) & \tau \geq \bar{\xi} & (10b) \end{cases}$$

233

234 where  $\lambda_1 = -(\alpha + \beta)$ ,  $\lambda_2 = -1$ , and  $\lambda_3 = 0$ . The behavior of equation 10a as a function of  $\alpha$  and

235  $\beta$  can be described as follows:

236  **$\alpha + \beta > 0$  (satisfied when  $\alpha \geq \beta$ )  $\rightarrow$  stable conditions.**

237  **$\alpha = \beta \rightarrow k_{on} \cdot L_0 = k_{off}$  and cancellation of  $k_i$ .** Under these conditions, equation 10a reduces

238 to:

$$c(\tau) = \frac{e^{-2 \cdot \alpha \cdot \tau}}{2 \cdot (2 \cdot \alpha - 1)} - \frac{\alpha \cdot e^{-\tau}}{2 \cdot \alpha - 1} + \frac{1}{2} \quad (11a)$$

239

240 the first term of which undergoes rapid decay at  $\alpha \gtrsim 10$  (translating to  $k_{onSS} = k_{on} \gtrsim 10 \cdot k_i /$

241  $L_0$ , where  $L_0 = n \cdot K_d'$ ), resulting in:

$$c(\tau) \cong -0.5 \cdot e^{-\tau} + \frac{1}{2} \quad (11b)$$

242

243 Constant fractional occupancy exists at all time points of equation 11b, which we define as the  
 244 steady-state occupancy (SSO) profile. Conversely, variable time-dependent fractional  
 245 occupancy occurs at  $\alpha < 10$ , which we define as the non-steady-state occupancy (nSSO)  
 246 profile. Unlike the equilibrium case, an asymmetric relationship exists between  $k_{on}$  and  $L_0$  in  
 247 governing dynamic occupancy, which follows from the requirement that  $\alpha = \beta \gtrsim 10$ . The  
 248 nSSO profile prevails at all non-saturating  $L_0$  in the absence of  $\alpha = \beta \gtrsim 10$ . For example:

249 1)  $\alpha = \beta = 1$  at  $L_0 = \mathbf{1x10^{-9} M}$ ,  $k_{on} = 1x10^5 M^{-1} s^{-1}$ ,  $k_{off} = 1x10^{-4} s^{-1}$ , and  $k_i = 1x10^{-4}$   
 250  $s^{-1}$  (noting that only  $\alpha = \beta$  is satisfied in this case).

251 2)  $\alpha = 10$  and  $\beta = 1$  at  $L_0 = \mathbf{1x10^{-8} M}$ ,  $k_{on} = 1x10^5 M^{-1} s^{-1}$ ,  $k_{off} = 1x10^{-4} s^{-1}$ , and  $k_i =$   
 252  $1x10^{-4} s^{-1}$  (noting that only  $\alpha \gtrsim 10$  is satisfied in this case).

253  $\alpha + \beta \gg 1 \rightarrow$  rapid decay of the first term in equation 10a, which at infinite time, reduces to  
 254 the equilibrium case:

$$c(\tau)_{\tau, \bar{\xi} \rightarrow \infty} = c_{\infty} = \frac{\alpha}{\alpha + \beta} = \frac{k_{on} \cdot L_0}{k_{on} \cdot L_0 + k_{off}} = \frac{\text{on - rate}}{\text{on - rate} + \text{off - rate}} \quad (12)$$

255

256 We assume that species or state population levels  $\geq 50\%$  of  $B_{max}$  make significant  
 257 contributions to cellular function, translating to a “functional” buildup + decay time window:

$$\Lambda = \left[ \frac{3}{k_i} - \left( \frac{\ln(2)}{k_i} \right) \right] + \frac{\ln(2)}{k_{-i}} \quad (13)$$

258

259 where  $k_i$  and  $k_{-i}$  likely range between  $ms^{-1}$  (e.g. voltage-gated ion channels) to  $hr^{-1}$ .

260 Fig 6. The buildup and decay phases of  $B_{total}(\tau)$  simulated using equations 6b and 6d  
 261 (scenario 1). The maximum  $B_{total}(\tau)$  is normalized to 1.0, and always occurs at the  
 262 normalized time  $\tau = 3$ . The curve adopts a canonical “saw-tooth” morphology.

263 ***Scenario 2: putative buildup and decay of the binding competent state***

264 Substituting equations 6c and 6e into equation 5 leads to:

$$c(\tau) = \frac{\alpha \cdot e^{-\tau_{01}}}{\alpha + \beta + 1} \cdot [e^{\tau} \cdot {}_2F_1(1, \alpha + \beta + 1; \alpha + \beta + 2; -e^{\tau - \tau_{01}}) - e^{-\tau \cdot (\alpha + \beta)} \cdot {}_2F_1(1, \alpha + \beta + 1; \alpha + \beta + 2; -e^{-\tau_{01}})] \quad \tau < \bar{\xi} \quad (14a)$$

$$c(\tau) = \frac{e^{-(\tau - \bar{\xi}) \cdot (\alpha + \beta)}}{\alpha + \beta} \cdot [c_{\infty} \cdot (\alpha + \beta) + \alpha \cdot e^{(\tau - \bar{\xi}) \cdot (\alpha + \beta)} \cdot {}_2F_1(1, \alpha + \beta; \alpha + \beta + 1; -e^{\tau - \tau_{02} - \bar{\xi}}) - \alpha \cdot {}_2F_1(1, \alpha + \beta; \alpha + \beta + 1; -e^{-\tau_{02}})] \quad \tau \geq \bar{\xi} \quad (14b)$$

265 where  ${}_2F_1(a, b; c; x)$  denotes the hypergeometric function. Unlike equation 6b, equation 6c contains  
 266 a lower asymptote, which approaches zero along the negative time axis. We set  $B_{total}(\tau = 0)$  to  
 267 5% of its full maximum value, and then calculated  $\tau_{01}$ ,  $\tau_{02}$ , and  $\bar{\xi}$  (the normalized settling time  
 268 corresponding to  $B_{max} = 95\%$  of the final value), as follows:

$$B_{total}(\tau) = \frac{1}{1 + e^{-(\tau - \tau_{01})}} \rightarrow 0.05 = \frac{1}{1 + e^{\tau_{01}}} \rightarrow \tau_{01} = \ln(19) \approx 2.94 \quad (15)$$

$$\bar{\xi} = 3 + \tau_{01} \approx 5.94 \quad (16)$$

$$\tau_{02} = 3 + \bar{\xi} \approx 8.94 \quad (17)$$

272

273 We solved equation 14 both analytically and numerically using Wolfram Alpha (Wolfram  
274 Research, Champaign, IL, 2017) and MATLAB (Version 9.2a, The MathWorks, Inc., Natick, MA  
275 2017), respectively. As for scenario 1, we assume that species levels or state populations  $\geq 50\%$   
276 of  $B_{max}$  make significant contributions to cellular function, which leads to the following  
277 expression for  $\Lambda$ :

$$\Lambda = 2 \cdot \ln(2)/k_i \quad (18)$$

278  
279

280 Fig 7. The buildup and decay phases of  $B_{total}(\tau)$  simulated using equations 6c and 6e  
281 (scenario 2). The maximum  $B_{total}(\tau)$  is normalized to 1.0, and always occurs at  $\tau = 6$ .  
282 The morphology approximately resembles that of the state transition curves in Figs 1B  
283 and 2A, keeping in mind that the plot is normalized in all cases to a uniform width of  $\tau =$   
284 12 at all  $\Lambda$ .

### 285 *Comparison of equilibrium versus non-equilibrium occupancy*

286 Static non-competitive, non-cooperative occupancy ( $\gamma$ ) under equilibrium conditions can be  
287 described by the following form of the Hill equation [23]:

$$\gamma = L_o/(L_o + K_d) \quad (19)$$

288

289 where  $L_o = n \cdot K_d$ . Fractional occupancy under the non-equilibrium SSO profile ( $c(\tau)$ ) is constant  
290 over time, and is also described by equation 19. However,  $K_d$  is non-equivalent under equilibrium  
291 versus non-equilibrium conditions:

292 **Equilibrium:**  $K_d = k_{off}/k_{on} \rightarrow$  absolute occupancy =  $\gamma \cdot B_o$ , where  $B_o$  is the fixed binding  
293 site concentration.



294 **Non-equilibrium SSO:**  $K_d' = \frac{k_{off}'}{k_{onSS}} = \frac{L_o \cdot k_{off}'}{10 \cdot k_i} \rightarrow$  absolute occupancy =  $\gamma \cdot B_{total}(t)$ . Achieving  
295 the SSO profile depends on in-step buildup and decay with  $B_{total}(t)$ , which in turn, depends  
296 on  $k_{on} \geq k_{onSS}$ .

297 **Non-equilibrium nSSO:**  $K_d'$  = the upper limit of fractional occupancy at  $B_{max}$ . nSSO occurs  
298 at all  $k_{on} < k_{onSS}$ , irrespective of  $k_{off}'$  and  $K_d'$ . The quasi-steady-state occupancy profile is  
299 achieved at near saturating  $L_o$  levels (referred to hereinafter as qSSO).

300 We assume the most biologically and pharmacologically desirable profile consists of SSO (i.e.  
301 where the intrinsic and extrinsic rates are tuned), which gives rise to constant fractional occupancy  
302 ( $B_{free}(t)/B_{total}(t)$ ) over time. However, the other profiles may suffice in cases where cellular  
303 function or pharmacological/toxic effects are driven by peak, rather than sustained occupancy (e.g.  
304 ion channel blockade vis-à-vis pro-arrhythmia [4]), which necessarily coincides with  $C_{max}$ .

305 *Characterization of dynamic binding site occupancy under conditions of time-dependent*  
306 *binding site availability*

307 We used equations 10 and 14 to explore the effect of decreasing  $\Lambda$  (and, in particular, speeding  $k_i$ )  
308 on achieving the SSO versus nSSO profile as a function of:

309  $\Lambda$ : 83,000 hr (equilibrium) to 300 ms (the approximate timescale of ion channel transitions),  
310 sampled as noted.

311  $K_d'$  (for reference): fixed at 1 nM, except where otherwise noted.

312  $k_{on}$ :  $1 \times 10^9$  (diffusion limit) to  $1 \times 10^3 \text{ M}^{-1} \text{ s}^{-1}$ , sampled as noted.

313  $k_{off}'$ :  $1 \times 10^0$  to  $1 \times 10^{-6} \text{ s}^{-1}$ , sampled as noted.

314  $L_0$ : sampled at 1 nM (i.e. 50% occupancy at equilibrium, equating to  $0.95 \cdot 50\%$  in our model),  
315 19 nM (95% occupancy at equilibrium, equating to  $0.95 \cdot 95\%$  in our model), as well as other  
316 concentrations (as noted).

### 317 *Key limitations of our approach*

318 Our generalized analytical occupancy relationships avoid assumptions about the specific dynamic  
319 mechanisms driving binding site availability. However, such simplified relationships are subject  
320 to certain limitations compared with Markov-based simulation models tailored to specific cellular  
321 systems (e.g. as was used in our previous work [1,4]), including the potential for underestimated  
322 sensitivity of dynamic occupancy to decreasing  $\Lambda$  resulting from: 1) the use of fixed free ligand  
323 concentration (where ligand and binding site buildup may or may not occur in phase); and 2)  
324 neglect of competition with endogenous molecules that may also build and decay over time.

## 325 **RESULTS**

326 Whereas static occupancy can be quantified using the Hill, Michaelis-Menten, and similar  
327 algebraic expressions, quantification of dynamic occupancy necessitates more complex time-  
328 dependent differential equation-based models. However, detailed knowledge of the participating  
329 species, parameters (e.g. rate constants), and initial conditions (e.g. states and species levels) is  
330 needed to fully implement such models. We set about in this work to characterize the relationships  
331 between intrinsic and extrinsic rates and SSO versus nSSO profiles using a set of closed form  
332 dimensionless relationships that we derived for this purpose (described in MATERIALS AND  
333 METHODS).

### 334 *Scenario 1*

335 In this scenario, binding site lifetimes are assumed to depend on the rates of production and  
336 degradation of binding site-containing species versus formation and decay of the binding-  
337 competent state (i.e. transition to the binding competent state fully mirrors the buildup and decay  
338 of the species).  $k_{off}'/k_{on} = L_0$  was maintained in all cases, except as otherwise noted. We  
339 characterized the sensitivity of  $c(\tau)$  to  $k_{on}$  and  $k_{off}$  as a function of decreasing  $\Lambda$  based on the  
340 following criteria:

- 341 1) The non-equilibrium threshold of  $\Lambda$  at which occupancy becomes kinetically- versus  $K_d$ -  
342 driven (i.e. the equilibrium regime).
- 343 2) The approximate  $k_{on}$  and  $k_{off}'$  required to achieve 50% and 95% occupancy under SSO  
344 conditions ( $L_0 = K_d'$  and  $19 \cdot K_d'$ , respectively).
- 345 3) The fold-increase in  $L_0$  required to approach the qSSO profile.

346 The results are summarized below and in Table 1.

### 347 *The equilibrium regime*

348 The equilibrium regime extends from  $\Lambda > 83,333$  hr ( $k_i = k_{-i} = 1 \times 10^{-8}$  s<sup>-1</sup>), at which  $c(\tau)$  is fully  
349 independent of absolute  $k_{off}$  and  $k_{on}$  (constrained in our study to  $k_{off}/k_{on} = K_d$ ), converging in  
350 all cases to the SSO profile (Fig 8). Under these conditions, the bound fraction is 50% or 95% ( $L_0$   
351 = 1 nM or 19 nM, respectively) at all instants of time, and  $c(\tau)$  exhibits the signature “saw-tooth”  
352 morphology of  $B_{total}(\tau)$ . The quasi-equilibrium regime resides between  $833 < \Lambda < 83,333$  hr (Fig  
353 9A).

354 Fig 8. (A) Plot of  $B_{total}(\tau)$  (gray),  $c(\tau)$  (red), and  $B_{free}(\tau)$  (obscured by  $c(\tau)$ ).  $k_i = k_{-i} =$   
355  $1 \times 10^{-8} \text{ s}^{-1}$ ,  $\Lambda = 83,333 \text{ hr}$ , and  $L_0 = K_d = 1 \text{ nM}$ , which yields 50% SSO at all times  
356 (denoted by equal lengths of the vertical arrows above and below their respective  
357 centroids), irrespective of  $k_{on}$  and  $k_{off}$  (holding  $K_d$  constant at 1 nM). (B) Same as A,  
358 except with  $L_0 = 19 \cdot K_d$ , which yields the expected SSO = 95%.

### 359 *The non-equilibrium regime*

360  $c(\tau)$  enters the non-equilibrium regime in our model at  $\Lambda \cong 833 \text{ hr}$  ( $k_i = k_{-i} = 1 \times 10^{-6} \text{ s}^{-1}$ ), where  
361 the SSO profile is achieved at  $k_{on} \geq k_{onSS} = 1 \times 10^4 \text{ M}^{-1} \text{ s}^{-1}$  (Fig 9). Suboptimal  $k_{on}$  results in the  
362 nSSO profile and loss of the signature saw-tooth morphology.  $c(\tau)$  lags behind, and decays ahead  
363 of  $B_{total}(\tau)$ , and  $c_{50}$  and  $c_{95}$  are no longer achieved.

364 Fig 9. (A) Plot of  $B_{total}(\tau)$  (gray),  $c(\tau)$  at a fixed  $L_0 = K_d = 1 \text{ nM}$  and  $\Lambda = 8,333 \text{ hr}$  ( $k_i =$   
365  $k_{-i} = 1 \times 10^{-7} \text{ s}^{-1}$ ), in which  $k_{on}$  was sampled between  $1 \times 10^3 \text{ M}^{-1} \text{ s}^{-1}$  to  $1 \times 10^5 \text{ M}^{-1} \text{ s}^{-1}$  (solid  
366 lines color-coded from blue to red as a function of increasing  $k_{on}$ ), and  $B_{free}(\tau)$  (dotted  
367 lines color coded the same as  $c(\tau)$ ).  $c(\tau)$  diverges slightly from SSO at  $k_{on} = 1 \times 10^3 \text{ M}^{-1}$   
368  $\text{s}^{-1}$ . (B) Same as A, except  $\Lambda = 1,667 \text{ hr}$  ( $k_i = k_{-i} = 5 \times 10^{-7} \text{ s}^{-1}$ ,  $k_{onSS} = 1 \times 10^3 \text{ M}^{-1} \text{ s}^{-1}$ ).  
369 (C) Same as A, except  $\Lambda = 833 \text{ hr}$  ( $k_i = k_{-i} = 1 \times 10^{-6} \text{ s}^{-1}$ ,  $k_{onSS} = 1 \times 10^4 \text{ M}^{-1} \text{ s}^{-1}$ ). (D)  
370 Same as A, except  $\Lambda = 167 \text{ hr}$  ( $k_i = k_{-i} = 5 \times 10^{-6} \text{ s}^{-1}$ ,  $k_{onSS} = 5 \times 10^4 \text{ M}^{-1} \text{ s}^{-1}$ ). (E) Same  
371 as A, except  $\Lambda = 3 \text{ hr}$  ( $k_i = k_{-i} = 1 \times 10^{-5} \text{ s}^{-1}$ ,  $k_{onSS} = 1 \times 10^5 \text{ M}^{-1} \text{ s}^{-1}$ ). (F) Same as A, except  
372  $\Lambda = 8.3 \text{ hr}$  ( $k_i = k_{-i} = 1 \times 10^{-4} \text{ s}^{-1}$ ,  $k_{onSS} = 1 \times 10^6 \text{ M}^{-1} \text{ s}^{-1}$ ). (G) Same as A, except  $\Lambda = 50$   
373  $\text{min}$  ( $k_i = k_{-i} = 1 \times 10^{-3} \text{ s}^{-1}$ ,  $k_{onSS} = 1 \times 10^7 \text{ M}^{-1} \text{ s}^{-1}$ ). (H) Same as A, except  $\Lambda = 5 \text{ min}$  ( $k_i$

374  $= k_{-i} = 1 \times 10^{-2} \text{ s}^{-1}$ ,  $k_{onSS} = 1 \times 10^8 \text{ M}^{-1} \text{ s}^{-1}$ .  $k_{on} = 1 \times 10^5 \text{ M}^{-1} \text{ s}^{-1}$ , the fastest  $k_{on}$  sampled  
 375 at this  $k_i$  (1,000-fold  $< k_{onSS}$ ), results in nearly zero occupancy.

376 Higher steady-state occupancies are achieved with decreasing  $\Lambda$  and  $k_{on}$  in the range of  $1 \times 10^5$  to  
 377  $1 \times 10^7 \text{ M}^{-1} \text{ s}^{-1}$  (Fig 10).

378 Fig 10. (A) Plot of  $B_{total}(\tau)$  (gray),  $c(\tau)$  at a fixed  $L_0 = K_d = 1 \text{ nM}$  and  $\Lambda = 8.3 \text{ hr}$  ( $k_i =$   
 379  $k_{-i} = 1 \times 10^{-4} \text{ s}^{-1}$ ,  $k_{onSS} = 1 \times 10^6 \text{ M}^{-1} \text{ s}^{-1}$ ), in which  $k_{on}$  was sampled between  $1 \times 10^5 \text{ M}^{-1} \text{ s}^{-1}$   
 380 to  $1 \times 10^7 \text{ M}^{-1} \text{ s}^{-1}$  (solid lines color-coded from blue to red according to increasing  $k_{on}$ ), and  
 381  $B_{free}(\tau)$  (dotted lines color coded the same as  $c(\tau)$ ). (B) Same as A, except  $\Lambda = 50 \text{ min}$  ( $k_i =$   
 382  $= k_{-i} = 1 \times 10^{-3} \text{ s}^{-1}$ ). (C) Same as A, except  $\Lambda = 5 \text{ min}$  ( $k_i = k_{-i} = 1 \times 10^{-2} \text{ s}^{-1}$ ,  $k_{onSS} =$   
 383  $1 \times 10^8 \text{ M}^{-1} \text{ s}^{-1}$ ). (D) Same as A, except  $\Lambda = 30 \text{ s}$  ( $k_i = k_{-i} = 1 \times 10^{-1} \text{ s}^{-1}$ ,  $k_{onSS} = 1 \times 10^9 \text{ M}^{-1}$   
 384  $\text{ s}^{-1}$ ). (E) Same as A, except  $\Lambda = 3 \text{ s}$  ( $k_i = k_{-i} = 1 \times 10^0 \text{ s}^{-1}$ ,  $k_{onSS} = 1 \times 10^{10} \text{ M}^{-1} \text{ s}^{-1}$ ).  $k_{on} =$   
 385  $1 \times 10^7 \text{ M}^{-1} \text{ s}^{-1}$ , the fastest  $k_{on}$  sampled at this  $k_i$  (1,000-fold  $< k_{onSS}$ ), results in nearly zero  
 386 occupancy.

387 Additional simulation results as a function of  $\Lambda$ ,  $k_{on}$ , and  $k_{off}$  are provided in the Supplementary  
 388 Information (S1-S4 Figs).

389 Table 1. Approximate  $k_{onSS}$  values needed to achieve the SSO profile as a function of  $k_i$ ,  
 390 calculated from  $10 \cdot k_i/L_0$ , where  $L_0 = K_d$  and  $k_{off} \geq k_{-i}$  (noting that  $k_{off}$  is not  
 391 hijacked under these conditions).

| $\Lambda$ | $k_i$<br>( $\text{s}^{-1}$ ) | <i>Buildup</i><br>$t_{1/2}$ | $k_{-i}$<br>( $\text{s}^{-1}$ ) | $K_d = k_{off}$<br>$/k_{on}$<br>( $\text{nM}$ ) | $k_{off} =$<br>$K_d \cdot k_{on}$<br>( $\text{s}^{-1}$ ) | $\sim k_{onSS}$<br>( $\text{M}^{-1} \text{ s}^{-1}$ ) |
|-----------|------------------------------|-----------------------------|---------------------------------|-------------------------------------------------|----------------------------------------------------------|-------------------------------------------------------|
| 83,333 hr | $1 \times 10^{-8}$           | 19,254 hr                   | $1 \times 10^{-8}$              | 1                                               | -                                                        | -                                                     |
| 833 hr    | $1 \times 10^{-6}$           | 192.5 hr                    | $1 \times 10^{-6}$              | 1                                               | $1 \times 10^{-5}$                                       | $1 \times 10^4$                                       |

|         |                    |          |                    |   |                    |                             |
|---------|--------------------|----------|--------------------|---|--------------------|-----------------------------|
| 83      | $1 \times 10^{-5}$ | 19.25 hr | $1 \times 10^{-5}$ | 1 | $1 \times 10^{-4}$ | $1 \times 10^5$             |
| 8.33 hr | $1 \times 10^{-4}$ | 1.9 hr   | $1 \times 10^{-4}$ | 1 | $1 \times 10^{-3}$ | $1 \times 10^6$             |
| 50 min  | $1 \times 10^{-3}$ | 11.6 min | $1 \times 10^{-3}$ | 1 | $1 \times 10^{-2}$ | $1 \times 10^7$             |
| 5 min   | $1 \times 10^{-2}$ | 1.16 min | $1 \times 10^{-2}$ | 1 | $1 \times 10^{-1}$ | $1 \times 10^8$             |
| 30 s    | $1 \times 10^{-1}$ | 6.9 s    | $1 \times 10^{-1}$ | 1 | $1 \times 10^0$    | $1 \times 10^{9\text{\S}}$  |
| 3 s     | $1 \times 10^0$    | 0.69 s   | $1 \times 10^0$    | 1 | $1 \times 10^1$    | $1 \times 10^{10\text{\S}}$ |
| 300 ms  | $1 \times 10^1$    | 69 ms    | $1 \times 10^1$    | 1 | $1 \times 10^2$    | $1 \times 10^{11\text{\S}}$ |
| 199 hr  | $1 \times 10^{-4}$ | 1.9 hr   | $1 \times 10^{-6}$ | 1 | $1 \times 10^{-3}$ | $1 \times 10^6$             |
| 20 hr   | $8 \times 10^{-4}$ | 14.4 min | $1 \times 10^{-5}$ | 1 | $1 \times 10^{-2}$ | $1 \times 10^7$             |
| 2.1 hr  | $3 \times 10^{-3}$ | 3.9 min  | $1 \times 10^{-4}$ | 1 | $1 \times 10^{-1}$ | $1 \times 10^8$             |

392

393        $\text{\S}$ Exceeds the diffusion limit (further gains in  $c(\tau)$  are necessarily driven by  $L_0$ ).

394

395       *Achieving the SSO profile depends on fast  $k_{on}$ , even for long-lived binding sites*

396       We assume that long lifetimes of cognate partners are achieved via fast buildup and slow decay  
397       of the binding-competent structural state or species levels, the latter of which may consist of  
398       synthesis and degradation or inter-compartmental shuttling (noting that species dilution caused  
399       by cell growth is not necessarily well described by our exponential functions). As is apparent  
400       from Fig 11, achieving steady-state occupancy remains dependent on  $k_{on} \geq k_{onSS}$ , even at very  
401       slow binding site decay rates. At  $k_{on} < k_{onSS}$ ,  $c(\tau)$  may converge to  $B_{total}(\tau)$  far beyond the  $B_{max}$   
402       time point.

403       Fig 11. (A) Plot of  $B_{total}(\tau)$  (black),  $B_{free}(\tau)$  (blue), and  $c(\tau)$  (gold) for  $\Lambda = 199$  hr ( $k_i =$   
404        $k_{-i} = 1 \times 10^{-4} \text{ s}^{-1}$   $1 \times 10^{-6} \text{ s}^{-1}$ ,  $k_{onSS} = 1 \times 10^6 \text{ M}^{-1} \text{ s}^{-1}$ ),  $L_0 = K_d = 1$  nM,  $k_{off} = 1 \times 10^{-5} \text{ s}^{-1}$ ,  
405       and  $k_{on} = 1 \times 10^4 \text{ M}^{-1} \text{ s}^{-1}$ . (B) Same as A, except  $\Lambda = 199$  hr ( $k_i = 1 \times 10^{-4} \text{ s}^{-1}$ ,  $k_{-i} = 1 \times 10^{-6}$   
406        $\text{ s}^{-1}$ ,  $k_{onSS} = 1 \times 10^6 \text{ M}^{-1} \text{ s}^{-1}$ ),  $k_{off} = 1 \times 10^{-3} \text{ s}^{-1}$ , and  $k_{on} = 1 \times 10^6 \text{ M}^{-1} \text{ s}^{-1}$ . In this example,  
407       approximate SSO is achieved at this  $k_{on}$ . (C) In this example,  $k_{on}$  is too slow to keep up

408 with  $B_{total}(\tau)$ , but  $c(\tau)$  converges to steady-state during the decay phase. Same as A, except  
409  $\Lambda = 20$  hr ( $k_i = 8 \times 10^{-4}$  s $^{-1}$ ,  $k_{-i} = 1 \times 10^{-5}$  s $^{-1}$ ,  $k_{onSS} = 1 \times 10^6$  M $^{-1}$  s $^{-1}$ ),  $k_{off} = 1 \times 10^{-3}$  s $^{-1}$ ,  
410 and  $k_{on} = 1 \times 10^6$  M $^{-1}$  s $^{-1}$ . (D) Same as A, except  $\Lambda = 2.1$  hr ( $k_i = 3 \times 10^{-3}$  s $^{-1}$ ,  $k_{-i} = 1 \times 10^{-4}$   
411 s $^{-1}$ ,  $k_{onSS} = 1 \times 10^7$  M $^{-1}$  s $^{-1}$ ),  $k_{off} = 1 \times 10^{-3}$  s $^{-1}$ , and  $k_{on} = 1 \times 10^6$  M $^{-1}$  s $^{-1}$ . Approximate SSO  
412 is achieved at this  $k_{on}$ .

## 413 **Scenario 2**

414 Binding site buildup and decay in this scenario are assumed to depend on fast conformational  
415 dynamics relative to the lifetime of the binding site-containing species, which may range case-by-  
416 case from ms (e.g. voltage-gated ion channels) to hr. We assume that scenarios 1 and 2 play  
417 different roles in biodynamics (i.e. the generation of non-equilibrium conditions and MDEs,  
418 respectively). However, our overall conclusions do not depend on this assumption. As for scenario  
419 1, we set about to characterize the effect of decreasing time-dependent binding site availability on  
420  $c(\tau)$ .

### 421 *The hypothetical equilibrium regime*

422 As for scenario 1, the SSO profile is achieved in the equilibrium case in a kinetics-agnostic manner  
423 ( $\Lambda = 3,851$  hr and  $k_i = k_{-i} = 1 \times 10^{-7}$  s $^{-1}$ ) (S5 Fig). Under these conditions, the bound fraction is  
424 50% or 95% ( $L_0 = 1$  nM or 19 nM, respectively) at all instants of time, and  $c(\tau)$  exhibits the same  
425 signature bi-sigmoidal morphology as that of  $B_{total}(\tau)$  (S5 Fig).

### 426 *The non-equilibrium regime*

427 As for scenario 1, faster  $k_{on}$  is needed to achieve the SSO profile as  $k_i$  becomes progressively  
428 faster. The nSSO profile, and loss of the signature bi-sigmoidal  $c(\tau)$  morphology, result from

429 suboptimal  $k_{on}$ . In such cases,  $c_{max}$  may no longer reach  $c_{50}$  or  $c_{95}$ , and  $c(\tau)$  lags behind, and decays  
430 ahead of  $B_{total}(\tau)$ .  $c(\tau)$  enters the non-equilibrium regime at  $\Lambda \cong 833$  hr ( $k_i = k_{-i} = 1 \times 10^{-6}$  s $^{-1}$ ),  
431 where a minimum  $k_{on}$  of  $\sim 1 \times 10^5$  M $^{-1}$  s $^{-1}$  is required to fully achieve the SSO profile (Fig 12).

432 Fig 12. (A) Plot of  $B_{total}(\tau)$  (gray),  $c(\tau)$  at a fixed  $L_0 = 1$  nM and  $\Lambda = 3,851$  hr ( $k_i = k_{-i}$   
433  $= 1 \times 10^{-7}$  s $^{-1}$ ), in which  $k_{on}$  was sampled between  $1 \times 10^3$  M $^{-1}$  s $^{-1}$  to  $1 \times 10^5$  M $^{-1}$  s $^{-1}$  (solid  
434 lines color-coded from blue to red according to increasing  $k_{on}$ ), and  $B_{free}(\tau)$  (dotted lines  
435 color coded the same as  $c(\tau)$ ). The  $c(\tau)$  are beginning to diverge from the steady-state at  
436 this  $\Lambda$ . (B) Same as A, except  $\Lambda = 385$  hr ( $k_i = k_{-i} = 1 \times 10^{-6}$  s $^{-1}$ ). (C) Same as A, except  $\Lambda$   
437  $= 3.85$  hr ( $k_i = k_{-i} = 1 \times 10^{-4}$  s $^{-1}$ ). (D) Same as A, except  $\Lambda = 23.1$  min ( $k_i = k_{-i} =$   
438  $1 \times 10^{-3}$  s $^{-1}$ ).  $k_{on} = 1 \times 10^5$  M $^{-1}$  s $^{-1}$ , the fastest  $k_{on}$  sampled at  $k_i = k_{-i} = 1 \times 10^{-2}$  s $^{-1}$ , results in  
439 nearly zero occupancy (not shown).

440 Additional simulation results as a function of  $\Lambda$ ,  $L_0$ ,  $k_{on}$ , and  $k_{off}$  are provided in S6-S7 Figs.

#### 441 ***The implications of binding dynamics for known short-lived binding sites***

442 We next assessed the implications of binding dynamics for hERG channel blockade and LDL  
443 receptor (LDL-R) binding to wild type (*wt*) versus the disease-causing gain-of-function D374Y  
444 mutant form of PCSK9.

#### 445 *PCSK9-LDL receptor*

446 We characterized PCSK9-LDL-R dynamic occupancy based on our scenario 1 model and the pH-  
447 dependent binding kinetics data reported in [12] (summarized in Table 2). Rapid buildup of PCSK9  
448 can be inferred from its observed  $\sim 5$  min half-life [24], which is driven by zymogen activation  
449 [25] rather than *de novo* expression (as may be the case for many short  $\Lambda$  species). Negligible



450 PCSK9-LDL-R occupancy at neutral pH follows from the exceptionally high  $K_d$  relative to  
 451 circulating plasma PCSK9 (which ranges between 30-3,000 ng/ml in humans (~405 pM to 40.5  
 452 nM) [26]), suggesting that extracellular binding depends on other factors. Binding and LDL-R  
 453 degradation have indeed been shown to depend on heparin sulfate proteoglycans present on the  
 454 extracellular surface of hepatocytes [27]. On the other hand, significant nSSO is achieved at the  
 455 upper end of the concentration range for both *wt* and mutant forms of PCSK9 at lysosomal pH (Fig  
 456 13), suggesting that gain-of-function mutations act either through relatively small increases in  
 457 dynamic occupancy relative to *wt*, or through some other means (e.g. by slowing PCSK9  
 458 degradation).

459 Table 2. Measured binding kinetics data for *wt* and D374Y mutant PCSK9- LDL-R [12].  
 460 Fold differences between  $k_{on}$  and  $k_{off}$  for D374Y versus *wt* are shown in parenthesis,  
 461 noting that the  $t_{1/2}$  of the bound complex is similar to that of *wt* PCSK9, but considerably  
 462 longer than that of the D374Y mutant (which is likely subject to  $k_{off}$  hijacking). The ratio  
 463 of  $k_{onSS}/k_{on}$  was calculated based on  $k_{onSS} = 1 \times 10^8 \text{ M}^{-1} \text{ s}^{-1}$ , corresponding to  $k_i = 1 \times 10^{-2}$   
 464  $\text{s}^{-1}$  (predicted from equation 13 under the assumption that  $k_i = k_{-i}$ ).

|                                                | <i>wt</i>             |                       | D374Y                                |                                      |
|------------------------------------------------|-----------------------|-----------------------|--------------------------------------|--------------------------------------|
|                                                | pH 7.4                | pH5.3                 | pH 7.4                               | pH5.3                                |
| $k_{on}$<br>( $\text{M}^{-1} \text{ s}^{-1}$ ) | 1.86x10 <sup>3</sup>  | 4.73x10 <sup>5</sup>  | 4.57x10 <sup>3</sup><br>(+2.5-fold)  | 6.74x10 <sup>5</sup><br>(+1.4-fold)  |
| $k_{onSS}/k_{on}$                              | 53,763                | 211                   | 21,881                               | 148                                  |
| $k_{off}$<br>( $\text{s}^{-1}$ )               | 1.17x10 <sup>-3</sup> | 1.97x10 <sup>-3</sup> | 4.64x10 <sup>-4</sup><br>(-2.5-fold) | 3.64x10 <sup>-4</sup><br>(-5.4-fold) |
| $k_{off}'$<br>( $\text{s}^{-1}$ )              | 1.17x10 <sup>-3</sup> | 1.97x10 <sup>-3</sup> | 2.3x10 <sup>-3§</sup>                | 2.3x10 <sup>-3§</sup>                |
| $K_d$<br>( $\text{M}$ )                        | 628x10 <sup>-9</sup>  | 4.19x10 <sup>-9</sup> | 101x10 <sup>-9</sup>                 | 0.54x10 <sup>-9</sup>                |

|               |                      |                       |                      |                      |
|---------------|----------------------|-----------------------|----------------------|----------------------|
| $K_d'$<br>(M) | $628 \times 10^{-9}$ | $4.19 \times 10^{-9}$ | $503 \times 10^{-9}$ | $3.4 \times 10^{-9}$ |
|---------------|----------------------|-----------------------|----------------------|----------------------|

465

466

§Similar clearance rates are assumed for both mutant and *wt* PCSK9.

467

468

Fig 13. (A) Plot of the hypothetical  $B_{total}(\tau)$  (gray) and  $c(\tau)$  for PCSK9 and PCSK9-LDL-

469

R binding at a fixed PCSK9  $L_0 = 1$  nM,  $\Lambda = 5$  min ( $k_i = k_{-i} = 1 \times 10^{-2} \text{ s}^{-1}$ ), and the  $k_{on}$

470

and  $k_{off}$  values given in Table 2 (solid lines color-coded as follows: *wt*/pH 7.4 dark blue

471

(not visible); *wt*/pH 5.3 purple; D374Y/pH 7.4 cyan; D374Y/pH5.3 green), and  $B_{free}(\tau)$

472

(dotted lines color coded the same as  $c(\tau)$ ). Simulated occupancy is essentially zero for

473

both *wt* and mutant PCSK9 at neutral pH, whereas negligible nSSO is achieved at low pH.

474

(B) Same as A, except  $L_0 = 20$  nM. Moderate nSSO is achieved at low pH (maximum

475

occupancy = 68% versus 75% for the *wt* and mutant forms, respectively). (C) Same as A,

476

except  $L_0 = 40.5$  nM. High nSSO is achieved at low pH, where the gap between *wt* and

477

mutant forms narrows to only a few percent at all time points (maximum occupancy = 82%

478

versus 85% for the *wt* and mutant forms, respectively).

#### 479 *hERG channel blockade by non-trappable compounds*

480 Certain hERG blockers are trapped within closed channels (which we refer to as “trappable”),

481 whereas others are expelled during channel closing (which we refer to as “non-trappable”) [4,28].

482 Trappable blocker occupancy builds to  $K_d'$  (the specific time-dependence of which depends on  $k_{on}$

483 ), whereas that by non-trappable blockers builds and decays during each gating cycle. The

484 ultrashort  $\sim 350$  ms lifetime of the open and inactivated channel states results in  $k_{off}$  hijacking, in

485 which  $k_{off}' = k_{off} \gtrsim \frac{k_{-i}}{3} (\sim 0.693 \text{ s}^{-1})$  and  $k_{off} \geq k_{-i} (\sim 2 \text{ s}^{-1})$  for the trappable and non-

486 trappable cases, respectively [4]. In our previous work, we characterized the dynamic occupancy

487 of a set of hypothetical non-trappable blockers using an alternate model, consisting of the O'Hara-  
488 Rudy action potential (AP) simulator, in which we replaced the Hodgkin-Huxley hERG model  
489 with a Markov state model incorporating blocker binding [4]. Here, we used the predicted pro-  
490 arrhythmic  $n \cdot K_d'$  versus  $n \cdot K_d$  as a function of  $k_{on}$ ,  $k_{off}$ , and  $k_{off}'$  as a metric of dynamic occupancy,  
491 and qualitatively compared the results with our binding dynamics models (Fig 14 versus S6(E) Fig  
492 and Table 3 versus Table 1).

493 Fig 14. (A) Plot of dynamic fractional hERG occupancy in mid-myocardial (M) cells by a  
494 hypothetical non-trappable blocker exhibiting  $k_{on} = 1 \times 10^5 \text{ M}^{-1} \text{ s}^{-1}$  and  $k_{off} = 5 \times 10^{-1} \text{ s}^{-1}$  (  
495  $K_d = 5 \text{ }\mu\text{M}$  and  $K_d' = 20 \text{ }\mu\text{M}$ ) sampled at 10 and 25  $\mu\text{M}$  (green solid and dashed curves,  
496 respectively). The total dynamic binding site level consists of the sum of the  
497 open/conducting and inactivated channel populations (gray dotted, solid, and dashed  
498 curves corresponding to 0, 10, and 25  $\mu\text{M}$  blocker concentrations, respectively). The  
499 overall shape of the channel state population curves qualitatively resembles our logistic  
500 model (in which  $k_i$  is very fast), noting that recovery from inactivation (the decay region  
501 of the curves) is slowed by blockade due to the smaller contribution of the hERG current  
502 to the membrane potential, which in turn, alters the response of the channel population  
503 (consistent with the recursive effect depicted in Fig 2). The blocker occupancy curves  
504 reflect nSSO occupancy at  $k_{on} = 1 \times 10^5 \text{ M}^{-1} \text{ s}^{-1}$  (where  $k_{on} \ll k_{onSS}$ , as suggested from  
505 Table 1), and the peak occupancy is far below 50% at 5  $\mu\text{M}$ . Nevertheless, even transient  
506 fractional occupancy approaching the ~45% level can be highly pro-arrhythmic [4]. (B)  
507 Plot of  $B_{total}(\tau)$  (gray),  $B_{free}(\tau)$  (blue) and  $c(\tau)$  (gold) simulated using our logistic model  
508 (scenario 2) for a hERG blocker exhibiting  $K_d = 5 \text{ }\mu\text{M}$  ( $k_{on} = 1 \times 10^5 \text{ M}^{-1} \text{ s}^{-1}$  and  $k_{off} =$

509 0.5 s<sup>-1</sup>) and [free blocker] = 10 μM.  $k_i$  and  $k_{-i}$  were set to 13 s<sup>-1</sup> and 2.1 s<sup>-1</sup>, respectively,  
 510 so as to reproduce  $B_{max}$  at  $\tau \approx 50$  ms and  $\Lambda \approx 350$  ms.  $B_{total}(\tau)$  and  $c(\tau)$  are qualitatively  
 511 similar to the curves in A.

512 Table 3.  $L_0$  (expressed as  $n \cdot K_d$  and  $n \cdot K_d'$ ) for a set of hypothetical hERG blockers  
 513 resulting in the pro-arrhythmic fractional channel occupancy levels predicted from our AP  
 514 simulations. Blocker  $K_d = 5$  μM in all cases, where  $k_{on}$  ranges between  $1 \times 10^4$  and  $1 \times 10^9$   
 515 M<sup>-1</sup> s<sup>-1</sup> and  $k_{off}$  between 0.005 and 5,000 (noting that the pro-arrhythmic occupancy level  
 516 increases as  $k_{off}$  speeds).  $n \cdot K_d$  was back-calculated from the predicted pro-arrhythmic  
 517 occupancy using equation 19.

|                                                         |                      |                      |                      |                      |                      |                      |
|---------------------------------------------------------|----------------------|----------------------|----------------------|----------------------|----------------------|----------------------|
| $k_{on}$ (M <sup>-1</sup> s <sup>-1</sup> )             | 1x10 <sup>4</sup>    | 1x10 <sup>5</sup>    | 1x10 <sup>6</sup>    | 1x10 <sup>7</sup>    | 1x10 <sup>8</sup>    | 1x10 <sup>9</sup>    |
| $k_{off}$ (s <sup>-1</sup> )                            | 5x10 <sup>-2</sup>   | 5x10 <sup>-1</sup>   | 5x10 <sup>0</sup>    | 5x10 <sup>1</sup>    | 5x10 <sup>2</sup>    | 5x10 <sup>3</sup>    |
| $k_{off}'$ (s <sup>-1</sup> )                           | 2                    | 2                    | 2                    | 2                    | 2                    | 2                    |
| <b>Fractional pro-arrhythmic hERG occupancy (%)</b>     | 42                   | 45                   | 53                   | 54                   | 55                   | 55                   |
| $n \cdot K_d' \rightarrow$ pro-arrhythmic occupancy (M) | 2.6x10 <sup>-4</sup> | 2.9x10 <sup>-5</sup> | 7.8x10 <sup>-6</sup> | 6.2x10 <sup>-6</sup> | 6.0x10 <sup>-6</sup> | 6.0x10 <sup>-6</sup> |
| $n \cdot K_d \rightarrow$ pro-arrhythmic occupancy (M)  | 3.6x10 <sup>-6</sup> | 4.1x10 <sup>-6</sup> | 5.7x10 <sup>-6</sup> | 5.9x10 <sup>-6</sup> | 6.1x10 <sup>-6</sup> | 6.1x10 <sup>-6</sup> |

518

### 519 *Implications of binding dynamics for drug discovery*

520 Both drug-target and endogenous time-dependent binding partner occupancy are described by  
 521 similar biodynamics principles. Namely:

- 522 1) Extrinsic rates: the rates of buildup and decay of the binding site and ligand, which may  
 523 vary with conditions.

- 524 2) Intrinsic rates:  $k_{on}$  and  $k_{off}$ , which may also vary with conditions.
- 525 3) Fractional occupancy at each instant of time ( $c(\tau)$ ). It is reasonable to assume that
- 526 molecular response (both efficacious and toxic) depends on  $c(\tau) \geq$  a fractional occupancy
- 527 threshold during each binding site buildup/decay cycle (in general, ranging from a small
- 528 fraction to nearly 100%, case-by-case).

529 Our results suggest the paramount importance of tuning  $k_{on}$  and  $k_{off}$  to the rates of binding site

530 buildup and decay, respectively, for achieving the Goldilocks zone of efficacious target occupancy

531 and target/off-target selectivity (Fig 15). Constant maximal fractional occupancy is maintained

532 under the SSO profile at the lowest possible  $L$  (where  $c(\tau)$  depends solely on  $L = n \cdot K_d$ ). On the

533 other hand, fractional occupancy in the qSSO regime approaches a constant level only under

534 saturating conditions (i.e. at  $n \gg 1$ ) (S3 Fig). Target/off-target selectivity may be compromised

535 with the nSSO profile, depending on the ratio of  $K_{d(target)}/K_{d(off-target)}$ , keeping in mind that

536 nSSO may exist for the target, and SSO for one or more off-targets and/or competing endogenous

537 substrates.

538 Fig 15. Hypothetical plot of drug  $L$  versus time (red), showing a series of buildup-decay

539 cycles (one per dose) culminating in a steady-state condition, together with the efficacious

540 threshold of  $L$  (green), the safe upper limit of  $L$  (orange), and the toxic level of  $L$  (red).  $L$

541 is maintained in the efficacious/sub-toxic “green zone” by overshooting and decaying back

542 to the efficacious level. Optimizing to the SSO regime affords the greatest chance of

543 achieving a therapeutic index in humans.

544 *Tuning kinetics to the qSSO profile*

545 Optimization of drug  $k_{off}$  or “residence time” (i.e.  $t_{1/2} = \ln(2)/k_{off}$ ) does not translate to  
546 increased occupancy when  $k_{off} < k_i$  (unless  $k_{-i}$  is slowed in the bound state). We used equation  
547 10 to test the effect of slowing  $k_{off}$  under qSSO versus SSO conditions (i.e.  $k_{on} < k_{on_{ss}}$  versus  
548  $k_{on} \geq k_{on_{ss}}$ ) at constant  $K_d$  (Fig 16).

549 Fig 16. Plot of  $B_{total}(\tau)$  (gray),  $c(\tau)$  at  $L_0 = k_{off}/k_{on} = 1$  nM and  $\Lambda = 5$  min ( $k_i = k_{-i} =$   
550  $1 \times 10^{-2}$  s $^{-1}$ ), in which  $k_{off}$  and  $k_{on}$  were sampled at  $5 \times 10^{-1}/5 \times 10^8$  M $^{-1}$  s $^{-1}$  (blue),  $5 \times 10^{-7}$  s $^{-1}/$   
551  $1/5 \times 10^5$  M $^{-1}$  s $^{-1}$  (magenta),  $5 \times 10^{-2}$  s $^{-1}/5 \times 10^8$  M $^{-1}$  s $^{-1}$  (cyan), and  $5 \times 10^{-5}$  s $^{-1}/5 \times 10^8$  M $^{-1}$  s $^{-1}$  (olive)  
552 (solid lines), and  $B_{free}(\tau)$  (dotted lines correspond to the  $c(\tau)$  color scheme).  $c(\tau)$  is unaffected  
553 by slowing  $k_{off}$  (magenta curve) when  $k_{on} < k_{on_{SS}}$ . However, when  $k_{on} \geq k_{on_{SS}}$ ,  $c(\tau)$   
554 increases when  $k_{off}$  is further slowed (e.g.  $5 \times 10^{-1}$  s $^{-1} \rightarrow 5 \times 10^{-2}$  s $^{-1}$  (cyan curve) and  $5 \times 10^{-1}$  s $^{-1}$   
555  $\rightarrow 5 \times 10^{-5}$  s $^{-1}$  (olive curve)).

556 Lastly, we used equation 10 to test the effect of increasing  $L_0$  toward the qSSO profile at  $k_{on}$   
557  $< k_{on_{ss}}$  (Fig 17 and S2 Fig).

558 Fig 17. (A) Plot of  $B_{total}(\tau)$  (black),  $B_{free}(\tau)$  (blue), and  $c(\tau)$  at  $L_0 = 0.5 \cdot K_d = 0.5$  nM  
559 and  $\Lambda = 5$  min ( $k_i = k_{-i} = 1 \times 10^{-3}$  s $^{-1}$ ,  $k_{on_{SS}} = 1 \times 10^8$  M $^{-1}$  s $^{-1}$ ), where  $k_{off} = 1 \times 10^{-1}$  s $^{-1}/k_{on}$   
560  $= 1 \times 10^8$  M $^{-1}$  s $^{-1}$  (gold). (B) Same as A, except at  $L_0 = K_d = 1$  nM, and  $k_{off} = 3 \times 10^{-4}$  s $^{-1}/$   
561  $1/k_{on} = 3 \times 10^5$  M $^{-1}$  s $^{-1}$ . Although  $c(\tau)$  reaches  $\sim c_{31}$  in both cases, the steady-state scenario  
562 in A reaches  $\sim c_{31}$  at all instants of time (an example of kinetically tuned binding), whereas  
563 the nSSO scenario results in considerably greater  $B_{free}(\tau)$  prior to  $c_{max}$  (an example of non-  
564 kinetically tuned binding). (C) Plot of  $B_{total}(\tau)$  (gray),  $c(\tau)$  at  $K_d = 1$  nM,  $\Lambda = 5$  min ( $k_i =$   
565  $k_{-i} = 1 \times 10^{-3}$  s $^{-1}$ ,  $k_{on_{SS}} = 1 \times 10^8$  M $^{-1}$  s $^{-1}$ ),  $k_{off} = 1 \times 10^{-5}$  s $^{-1}$ , and  $k_{on} = 1 \times 10^4$  M $^{-1}$  s $^{-1}$ , in

566 which  $L_0$  was sampled between 1 nM and 2  $\mu$ M (solid lines), and  $B_{free}(\tau)$  (dotted lines  
567 correspond to the  $c(\tau)$  color scheme). Slow  $k_{on}$  is only compensated at sufficiently high  $L_0$ ,  
568 which in this case, approaches SSO conditions at  $L_0 = 1 \mu$ M.

569

### 570 *The putative effects of competition and drug pharmacokinetics (PK) on drug-target occupancy*

571 Although we have not considered the effects of endogenous ligand competition and time-  
572 dependent drug concentration ( $L(t)$ ) on dynamic drug-target occupancy, these factors can only  
573 serve to further increase  $k_{on_{SS}}$ . The rates of binding site and drug buildup within the target-  
574 containing compartment (which may or may not be slower than the rate of drug buildup within the  
575 central compartment) should ideally be synchronized to ensure that  $L$  is always  $\geq K_d$ . Fractional  
576 drug-target occupancy is decreased by  $L_e \cdot K_i / K_e$  in the presence of endogenous ligand  
577 competition, as is apparent from the following equation [23]:

$$\gamma = L / \left( L + K_i + \left( \frac{K_i \cdot L_e}{K_e} \right) \right) \quad (20)$$

578

579 where  $L_e$ ,  $K_e$ , and  $K_i$  are the free endogenous ligand concentration and  $K_d$ , and inhibitory drug  $K_d$ ,  
580 respectively. For example, drug SSO = 50% is achieved at  $L_{50} = K_i + L_e$  when  $K_i = K_e$ , and  $L_{50}$   
581 further increases with increasing  $L_e$  (or synchronization with binding site buildup) and/or  
582 decreasing  $K_e$ . It is further apparent that qSSO is achieved at higher  $L$  than in the non-competitive  
583 case, and that competition between endogenous ligand binding via the SSO profile would be  
584 greatly favored over inhibitory drug binding via the nSSO profile (more the reason for optimizing  
585 to  $k_{on} \geq k_{on_{SS}}$ ).

586 *The binding kinetics profiles of marketed drugs are consistent with non-equilibrium drug-target*  
587 *binding*

588 We set about to test the relative importance of  $k_{on,ss}$  versus  $k_{off}$  in the human setting using  
589 measured  $k_{on}$  and  $K_d$  data curated by Dahl and Akrud for 32 marketed drugs [29] (reproduced in  
590 Table 3). We assume that marketed drugs observe steady-state or quasi-steady-state occupancy for  
591 targets with fast  $k_i$  and  $k_{-i}$ , or bind to targets that build and decay slowly (i.e. kinetics-agnostic  
592 occupancy). The data can be summarized as follows:

593 1)  $k_{on}$  ranges between  $1.4 \times 10^1$  and  $9.2 \times 10^7 \text{ M}^{-1} \text{ s}^{-1}$ , with  $k_{on} \geq 1 \times 10^5 \text{ M}^{-1} \text{ s}^{-1}$  occurring in  
594  $\sim 72\%$  of the cases, sufficient for achieving the SSO profile for binding site buildup times  
595 between  $1 \text{ m} \lesssim t_{1/2} \lesssim 19 \text{ h}$  (blue text in Table 3).

596 2)  $k_{off}$  ranges between  $4.8 \times 10^{-6}$  and  $2.8 \text{ s}^{-1}$ , with  $k_{off} < 3.9 \times 10^{-4} \text{ s}^{-1}$  ( $t_{1/2} \geq 30 \text{ min}$ ) occurring  
597 in  $\sim 47\%$  of the cases (green text in Table 3).

598 3)  $K_d < 1 \text{ nM}$  was achieved in  $\sim 44\%$  of the cases (red text in Table 3), which is due to  $k_{off} <$   
599  $3.9 \times 10^{-4} \text{ s}^{-1}$  in  $57\%$  of those cases (i.e. extreme potency is not driven by slow  $k_{off}$ ).

600 4)  $k_{off} > 3.9 \times 10^{-4} \text{ s}^{-1}$  and  $k_{on} > 1 \times 10^5 \text{ M}^{-1} \text{ s}^{-1}$  (i.e.  $k_{on}$ -driven occupancy) occurs in  $\sim 44\%$  of  
601 the cases.

602 5)  $k_{off} < 3.9 \times 10^{-4} \text{ s}^{-1}$  and  $k_{on} < 1 \times 10^5 \text{ M}^{-1} \text{ s}^{-1}$  (i.e.  $k_{off}$ -driven occupancy) occurs in only  
603  $\sim 19\%$  of the cases, of which 4 are receptors, 2 are NS3 protease, and 1 is HIV-1 RT (noting  
604 that  $k_{on}$  is near our cutoff in the receptor ligand telmisartan, and the NS3 inhibitor  
605 ciluprevir exhibits fast  $k_{on}$ ).



606 These observations (and numbers 4 and 5 in particular) are consistent with our claim that high  
 607 dynamic occupancy under non-equilibrium conditions found *in vivo* depends first and foremost on  
 608 fast  $k_{on}$ , and further suggest that the rates of buildup of many of the targeted binding sites are  $\geq$   
 609  $1 \times 10^{-5} \text{ s}^{-1}$  (based on Table 1), assuming that  $k_{on}$  was, in fact, wittingly or unwittingly optimized to  
 610  $k_{on_{ss}}$ . This contrasts with the claim of Dahl and Akrud [29] and Folmer [30] that the drugs were  
 611 optimized on the basis of  $K_d$  (noting that Folmer acknowledges the greater contribution of fast  $k_{on}$   
 612 over slow  $k_{off}$  to drug success [30]).

613 Table 3. Published  $k_{on}$ ,  $k_{off}$ , and  $K_d$  values for a set of marketed drugs [29]. The drugs are  
 614 grouped and color-coded by target. Cases of  $K_d < 1 \text{ nM}$  are color-coded with red text,  $k_{on} >$   
 615  $1 \times 10^5 \text{ M}^{-1} \text{ s}^{-1}$  are color-coded with blue text, and  $t_{1/2} > 30 \text{ min}$  are color-coded with green  
 616 text.

617

| Drug          | Target                               | $k_{on}$<br>( $\text{M}^{-1} \text{ s}^{-1}$ ) | $k_{off}$<br>( $\text{s}^{-1}$ ) | $t_{1/2}$<br>(min) | $K_d$<br>(M) |
|---------------|--------------------------------------|------------------------------------------------|----------------------------------|--------------------|--------------|
| Aliskiren     | Renin                                | 4.00E+05                                       | 1.1E-04                          | 105                | 3.00E-10     |
| Aclidinium    | Muscarinic M3 receptor               | 1.10E+06                                       | 2.0E-05                          | 578                | 1.80E-11     |
| Ipratropium   | Muscarinic M3 receptor               | 4.10E+06                                       | 1.1E-03                          | 11                 | 2.60E-10     |
| Tiotropium    | Muscarinic M3 receptor               | 7.60E+05                                       | 7.2E-06                          | 1604               | 9.50E-12     |
| Candesartan   | Human angiotensin II type 1 receptor | 2.60E+04                                       | 1.9E-04                          | 61                 | 7.40E-09     |
| Telmisartan   | Human angiotensin II type 1 receptor | 9.10E+04                                       | 1.5E-04                          | 77                 | 1.70E-09     |
| Granisetron   | 5-HT3                                | 7.50E+05                                       | 7.5e-04                          | 15                 | 1.00E-09     |
| Lapatinib     | ERBB2/EGFR                           | 1.30E+04                                       | 3.9e-05                          | 296                | 3.00E-09     |
| Desloratadine | Histamine H1 receptor                | 3.20E+04                                       | 3.2e-05                          | 361                | 1.00E-09     |
| Amlodipine    | L-type calcium channel               | 1.50E+05                                       | 3.0E-04                          | 39                 | 2.00E-09     |
| Verapamil     | L-type calcium channel               | 9.20E+07                                       | 2.8E0                            | 0.004              | 3.00E-08     |
| Phenytoin     | Na <sup>+</sup> channel              | 2.50E+04                                       | 5.0E-01                          | 0.02               | 2.00E-05     |

|                   |                                                |          |         |       |          |
|-------------------|------------------------------------------------|----------|---------|-------|----------|
| Amprenavir        | HIV-1 protease                                 | 4.40E+06 | 4.9E-03 | 2     | 1.10E-09 |
| Atazanavir        | HIV-1 protease                                 | 1.70E+06 | 6.9E-04 | 17    | 4.00E-10 |
| Indinavir         | HIV-1 protease                                 | 1.50E+06 | 1.6e-03 | 7     | 1.10E-09 |
| Lopinavir         | HIV-1 protease                                 | 6.60E+06 | 6.5E-04 | 18    | 1.00E-10 |
| Ritonavir         | HIV-1 protease                                 | 3.90E+06 | 2.2E-03 | 5     | 6.10E-10 |
| Saquinavir        | HIV-1 protease                                 | 8.20E+05 | 2.3E-04 | 50    | 3.20E-10 |
| Nelfinavir        | HIV-1 protease                                 | 6.60E+05 | 6.7E-04 | 17    | 1.60E-09 |
| Boceprevir        | Hepatitis C virus nonstructural protease (NS3) | 2.40E+03 | 4.9E-05 | 236   | 2.00E-08 |
| Ciluprevir        | Hepatitis C virus nonstructural protease (NS3) | 9.10E+05 | 7.3E-04 | 16    | 6.20E-09 |
| Telaprevir        | Hepatitis C virus nonstructural protease (NS3) | 2.20E+03 | 9.6E-05 | 120   | 4.30E-08 |
| Deoxy-conformycin | Adenosine deaminase                            | 2.40E+06 | 4.8E-06 | 2,406 | 2.00E-12 |
| Efavirenz         | HIV-1 reverse transcriptase                    | 1.40E+01 | 6.8E-05 | 170   | 5.00E-06 |
| Elvitegravir      | HIV integrase                                  | 2.10E+06 | 8.3e-03 | 1     | 4.00E-09 |
| Raltegravir       | HIV integrase                                  | 2.50E+05 | 2.5e-03 | 5     | 1.00E-08 |
| Methotrexate      | Chicken dihydrofolate reductase                | 3.70E+07 | 3.3e-04 | 35    | 9.00E-12 |
| Trimethoprim      | Escherichia coli dihydrofolate reductase       | 7.20E+07 | 1.4e-03 | 8     | 2.00E-11 |
| Oseltamivir       | Viral neuraminidase                            | 7.90E+05 | 2.5e-04 | 46    | 3.10E-10 |
| Saxagliptin       | Human dipeptidyl-peptidase IV                  | 1.60E+05 | 5.4e-05 | 214   | 3.50E-10 |
| Vildagliptin      | Human dipeptidyl-peptidase IV                  | 8.70E+04 | 9.8e-04 | 12    | 1.10E-08 |
| Triclosan         | Enoyl-ACP reductase and Francisella tularensis | 8.20E+06 | 4.2e-04 | 28    | 5.10E-11 |

618

## 619 Discussion

620 The fundamental mechanisms by which molecular properties are transduced into cellular structure-  
 621 function are poorly understood. Molecules are an unruly lot, whose states are distributed randomly  
 622 in the absence of transducible energy inputs to achieve maximal configurational entropy. The

623 relevant energy inputs consist largely of: 1) H-bond losses and gains among solvating water  
624 molecules (versus other liquid solvents); and 2) continual/continuous production and decay of the  
625 participating species needed to maintain non-equilibrium conditions. Furthermore, dynamic  
626 counter-balancing is essential for overcoming the inherent susceptibility of exponential molecular  
627 state transitions to under- and overshooting. Our biodynamics theory, in which cellular structure-  
628 function is predicated on a molecular form of analog computing, is well-aligned with these  
629 principles. Multiple levels of integrated dynamic contributions underlying cellular function,  
630 dysfunction, pharmacodynamics, and drug PK are addressed by our theory, the implications of  
631 which are summarized in the following sections.

632 ***The rates of change in binding partner levels/states are sensed via binding dynamics***

633 The bound fraction of binding or catalytic sites can be calculated under strictly equilibrium  
634 conditions using the Hill and Michaelis-Menten equations, respectively. However, binding sites  
635 undergo transient buildup and decay driven by synthesis/degradation, translocation, or  
636 conformational state transitions to/from their binding-competent states. The lifetimes of many  
637 proteins range from single-digit minutes to hours [21] (e.g. PCSK9 is on the order of 5 min [24],  
638 and tumor cell line-derived NIK ranges from ~5-30 min [31]). The lifetimes of binding competent  
639 states can range from  $\mu\text{s}$  (e.g. mRNA) or ms (e.g. voltage-gated ion channels) to the lifetime of the  
640 molecule itself. Here, we have shown that dynamic occupancy is greatly influenced by the time  
641 window of binding site availability, where the SSO profile is only achieved when  $k_{on}$  is on the  
642 order of  $k_i$ . We assume that the association and dissociation rate constants for endogenous partners  
643 are kinetically tuned to the dynamic ranges of  $B_{total}(t)$  and  $L(t)$ . Perturbations to partner  
644 states/levels can be sensed through binding dynamics, and specifically, kinetic tuning/de-tuning of  
645  $C(t)$  via:

- 646 1) Modulation of the maximum time-dependent binding partner levels ( $B_{total}(t)$ ) (the  
647 “extrinsic” rates [1]).
- 648 2) Slowing/speeding of  $k_i$  and  $k_{-i}$  thereby shifting the  $k_{on}$  threshold for achieving the SSO  
649 profile (i.e.  $k_{onSS}$ ) or the qSSO profile.
- 650 3) Modulation of partner-specific association and dissociation rate constants ( $k_{on}$  and  $k_{off}$ )  
651 (the “intrinsic” rates [1]).

652 Sensitivity of cellular function to the bound state depends on:

- 653 1) The dynamic range in  $B_{total}(t)$ :
- 654 a) Constitutively low  $B_{total}(t)$  levels may result in undetectable levels of the bound  
655 state.
- 656 b) Constitutively high  $B_{total}(t)$  levels may result in reduced sensitivity of the bound  
657 state to changes in concentration of the other partner(s).
- 658 2)  $k_{on}$  (subject to allosteric modulation, case-by-case).
- 659 a) Very fast  $k_{on}$  ( $\gg k_{onSS}$ ) diminishes the sensitivity of the bound state to changes in  
660 partner concentration.
- 661 b) Very slow  $k_{on}$  ( $\ll k_{onSS}$ ) may result in undetectable levels of the bound state at  
662 lower partner concentrations.

663 We assume that cellular systems operate within the binding sensitive regime, such that the buildup  
664 and decay of binding partners and the bound states thereof remain in phase over time. Although

665 we have assumed a constant free ligand concentration in constructing our analytical dynamic  
666 occupancy expressions, it is apparent that this condition rarely occurs *in vivo* (noting that buildup  
667 and decay of the binding partners may proceed at different rates, and in an in- or out-of-phase  
668 relationship). As such, variable ligand concentration introduces potentially far greater kinetic  
669 demands on dynamic occupancy, which is likely underestimated in our approach.

### 670 ***The implications of biodynamics for pharmacodynamics and drug discovery***

671 Efficacious and toxic drug levels are conventionally defined in terms of the equilibrium scenario  
672 (equation 20), which rests on the assumptions that drug-target occupancy, drug exposure within  
673 the target compartment (typically intra- or extracellular), and target level are quasi-time-  
674 independent quantities, when in fact, they are not:

- 675 1) Biomolecular species underlying cellular function undergo continuous  
676 production/degradation and state transitions (including drug targets).
- 677 2) Drug levels build and decay based on PK principles (S7 Fig).
- 678 3) Drug-target binding builds and decays based on binding dynamics principles.
- 679 4) Drug-target binding alters the rates of dysfunction promoting processes (i.e.  
680 pharmacodynamics).

681 Pharmacodynamics may be taken as the mitigation of Yin-Yang imbalances [1] via the insertion  
682 of one or more exogenous MDEs into afflicted system(s) (where inhibition and stimulation  
683 effectively slow and speed target buildup, respectively). As for endogenous complexes:

- 684 1) Buildup of drug-target occupancy is on-rate driven, and the bound state must rebuild with  
685 each target buildup/decay cycle due to loss of the bound drug-target population.

- 686 2) On-rate may be driven by  $k_{on}$  and/or free drug concentration.
- 687 3) The SSO profile is achievable, in practice, for kinetically tuned binding, in which  $k_{on}$  is  
688 optimized to  $\geq k_{onSS}$ , as dictated by the lifetime of the target or binding site (Fig 18). Under  
689 these conditions, efficacious or toxic occupancy, which can conceivably vary from  $\ll 50\%$   
690 to 95+% is expected at a free drug concentration  $= n \cdot K_d$  (e.g.  $n = 19$  yields 95%  
691 occupancy), noting that the putative safe range of trappable hERG blocker occupancy  
692 ranges between 0-3% [4]. Conversely, achieving the qSSO profile (converging to  $\sim 95\%$   
693 occupancy) may require considerably larger  $n$  than the SSO profile.
- 694 4) In the absence of kinetic tuning, the SSO profile is unachievable via escalation of drug  
695 concentration, although the qSSO profile is conceivable at sub-toxic exposures. This  
696 constitutes a potential source of *in vitro-in vivo* disconnects and clinical failures due to loss  
697 of the therapeutic index. The worst-case scenario consists of a drug that is kinetically  
698 mistuned to its target, while being kinetically tuned to one or more off-targets, and that  
699 competes for the target with an endogenous kinetically tuned partner.
- 700 5) Residence time (i.e.  $\ln(2)/k_{off}$  below the rate of binding site decay adds no benefit to  
701 occupancy (target dynamics are not considered by other workers advocating  $k_{off}$   
702 optimization [32,33]).

703 Fig 18. Optimization of dynamic occupancy is achieved by first speeding  $k_{on}$  to  $\geq k_{onSS}$   
704 (based on the binding site lifetime), followed by slowing  $k_{off}$  to  $k_{-i}$ , a process we refer to  
705 as “kinetic tuning.” The ultimate objective is to achieve the highest occupancy at the lowest

706 free drug concentration (i.e. the SSO profile), affording the greatest chance for achieving  
707 a therapeutic index in humans.

708

## 709 **Conclusion**

710 In our previous work [1], we outlined a first principles theoretical framework (referred to herein  
711 as biodynamics) that explains the general mechanisms of cellular analog computing on the basis  
712 of non-equilibrium biomolecular state transitions, as well as the key implications of our theory for:

713 1) The transformation of chemical systems into living cells capable of maintaining non-  
714 equilibrium conditions, harnessing exponential behavior, and exploiting water H-bond  
715 energy to generate state transition barriers.

716 2) The origin of disease-causing cellular dysfunction (Yin-Yang imbalances), and the  
717 pharmacological mitigation thereof (insertion of exogenous MDEs capable of fully or  
718 partially restoring the normal Yin-Yang balance).

719 The current work is focused on the interplay between two key biodynamics contributions  
720 consisting of molecular dynamics and binding dynamics. We used a simplified analytical model  
721 that qualitatively captures these contributions to explore the possible effects of non-equilibrium  
722 conditions (namely, binding site buildup and decay) on dynamic occupancy. Our results suggest  
723 that:

724 1) Achieving the SSO profile as a function of diminishing binding site lifetime depends on  
725 increasingly faster  $k_{on}$  (noting that nSSO  $\rightarrow$  the qSSO profile is achievable only at high  $L$   
726 compared with SSO).

727 2) Nature has likely tuned  $k_{on}$  to achieve SSO or qSSO binding for endogenous partners (i.e.  
728 maximal binding efficiency).

729 Our findings challenge the conventional equilibrium binding paradigm on which much of modern  
730 drug discovery is based, as follows:

731 1) Knowledge of target and binding site buildup and decay rates is essential for achieving the  
732 SSO profile on a non-trial-and-error basis.

733 2) Binding site lifetimes ranging from single-digit hours to milliseconds require increasingly  
734 faster  $k_{on}$  to achieve the SSO profile (i.e. kinetic tuning versus potency optimization).

735 3) Increased drug exposure (i.e. PK) is a poor substitute for kinetically tuned binding, in which  
736 the qSSO profile is only asymptotically approached. As such, dose escalation during  
737 clinical trials is an extremely risky proposition from the safety standpoint.

### 738 **Acknowledgements**

739 We gratefully acknowledge Xin Chen and Andrei Golosov for helpful discussions and comments  
740 on this manuscript.



741 **References**

- 742 1. Pearlstein RARA, McKay DJDDJJ, Hornak V, Dickson C, Golosov A, Harrison T, et al.  
743 Building New Bridges between In Vitro and In Vivo in Early Drug Discovery: Where  
744 Molecular Modeling Meets Systems Biology. *Curr Top Med Chem.* 2017;17: 1–1.  
745 doi:10.2174/1568026617666170414152311
- 746 2. Daniel R, Rubens JR, Sarpeshkar R, Lu TK. Synthetic analog computation in living cells.  
747 *Nature.* Nature Publishing Group; 2013;497: 619–623. doi:10.1038/nature12148
- 748 3. Howe RM. Fundamentals of the Analog Computer. *IEEE Control Syst Mag.* 2005; 29–36.
- 749 4. Pearlstein RA, MacCannell KA, Erdemli G, Yeola S, Helmlinger G, Hu Q-Y, et al.  
750 Implications of dynamic occupancy, binding kinetics, and channel gating kinetics for  
751 hERG blocker safety assessment and mitigation. *Curr Top Med Chem.* 2016;16.
- 752 5. O’Hara T, Virág L, Varró A, Rudy Y. Simulation of the undiseased human cardiac  
753 ventricular action potential: model formulation and experimental validation. *PLoS*  
754 *Comput Biol.* 2011;7: e1002061. doi:10.1371/journal.pcbi.1002061
- 755 6. Willis WT, Jackman MR, Messer JI, Kuzmiak-Glancy S, Glancy B. A simple hydraulic  
756 analog model of oxidative phosphorylation. *Med Sci Sports Exerc.* 2016;48: 990–1000.  
757 doi:10.1249/MSS.0000000000000884
- 758 7. Alon U. *An introduction to systems biology : design principles of biological circuits.*  
759 Chapman & Hall/CRC; 2007.
- 760 8. Keener J, Sneyd J, editors. *Mathematical Physiology [Internet].* New York, NY: Springer  
761 New York; 2009. doi:10.1007/978-0-387-75847-3

- 762 9. Keener JP. Mathematical physiology 2009 : systems physiology ii. 2nd revise. Springer;  
763 2008.
- 764 10. Beard DA. Biosimulation : simulation of living systems [Internet]. Cambridge University  
765 Press; 2012. Available:  
766 [https://books.google.com/books?id=PPI3yNpij9gC&pg=PR4&lpg=PR4&dq=Daniel+A.+](https://books.google.com/books?id=PPI3yNpij9gC&pg=PR4&lpg=PR4&dq=Daniel+A.+Beard.+Biosimulation:+Simulation+of+Living+Systems.+Cambridge+University+Press,+Cambridge,+UK.,+2012.+ISBN+978-0-521-76823-8.&source=bl&ots=RKhaR4C26H&sig=WXszESobIMh3VrWyH9lDX8nuZ)  
767 [Beard.+Biosimulation:+Simulation+of+Living+Systems.+Cambridge+University+Press,+](https://books.google.com/books?id=PPI3yNpij9gC&pg=PR4&lpg=PR4&dq=Daniel+A.+Beard.+Biosimulation:+Simulation+of+Living+Systems.+Cambridge+University+Press,+Cambridge,+UK.,+2012.+ISBN+978-0-521-76823-8.&source=bl&ots=RKhaR4C26H&sig=WXszESobIMh3VrWyH9lDX8nuZ)  
768 [Cambridge,+UK.,+2012.+ISBN+978-0-521-76823-](https://books.google.com/books?id=PPI3yNpij9gC&pg=PR4&lpg=PR4&dq=Daniel+A.+Beard.+Biosimulation:+Simulation+of+Living+Systems.+Cambridge+University+Press,+Cambridge,+UK.,+2012.+ISBN+978-0-521-76823-8.&source=bl&ots=RKhaR4C26H&sig=WXszESobIMh3VrWyH9lDX8nuZ)  
769 [8.&source=bl&ots=RKhaR4C26H&sig=WXszESobIMh3VrWyH9lDX8nuZ](https://books.google.com/books?id=PPI3yNpij9gC&pg=PR4&lpg=PR4&dq=Daniel+A.+Beard.+Biosimulation:+Simulation+of+Living+Systems.+Cambridge+University+Press,+Cambridge,+UK.,+2012.+ISBN+978-0-521-76823-8.&source=bl&ots=RKhaR4C26H&sig=WXszESobIMh3VrWyH9lDX8nuZ)
- 770 11. Voit EO. A first course in systems biology. Garland Science; 2013.
- 771 12. Pearlstein RA, Hu Q-Y, Zhou J, Yowe D, Levell J, Dale B, et al. New hypotheses about  
772 the structure-function of proprotein convertase subtilisin/kexin type 9: Analysis of the  
773 epidermal growth factor-like repeat A docking site using WaterMap. *Proteins Struct Funct*  
774 *Bioinforma*. Wiley-Blackwell; 2010;78: 2571–2586. doi:10.1002/prot.22767
- 775 13. Pearlstein RA, Sherman W, Abel R. Contributions of water transfer energy to protein-  
776 ligand association and dissociation barriers: Watermap analysis of a series of p38 $\alpha$  MAP  
777 kinase inhibitors. *Proteins Struct Funct Bioinforma*. 2013;81. doi:10.1002/prot.24276
- 778 14. Tran Q-T, Williams S, Farid R, Erdemli G, Pearlstein R. The translocation kinetics of  
779 antibiotics through porin OmpC: Insights from structure-based solvation mapping using  
780 WaterMap. *Proteins Struct Funct Bioinforma*. 2013;81. doi:10.1002/prot.24185
- 781 15. Velez-Vega C, McKay DJJ, Kurtzman T, Aravamuthan V, Pearlstein RA, Duca JS.  
782 Estimation of solvation entropy and enthalpy via analysis of water oxygen-hydrogen

- 783 correlations. *J Chem Theory Comput.* 2015;11. doi:10.1021/acs.jctc.5b00439
- 784 16. Pratt JM, Petty J, Riba-Garcia I, Robertson DHL, Gaskell SJ, Oliver SG, et al. Dynamics  
785 of Protein Turnover , a Missing Dimension in Proteomics. 2002; 579–591.  
786 doi:10.1074/mcp.M200046-MCP200
- 787 17. Hopper AK, Patel M, Furia BS, Peltz SW, Trotta CR, Trotta CR, et al. Proteome Half-Life  
788 Dynamics in Living Human Cells. 2011; 764–769.
- 789 18. Yen HS, Xu Q, Chou DM, Zhao Z, Elledge SJ. Global Protein Stability Profiling in  
790 Mammalian Cells. 2008;322: 918–924.
- 791 19. Rothman S. How is the balance between protein synthesis and degradation achieved ?  
792 2010; 1–11.
- 793 20. Jiang X, Coffino P, Li X. Development of a method for screening short-lived proteins  
794 using green fluorescent protein. 2004;
- 795 21. Loriaux PM, Hoffmann A, Haugh JM. A Protein Turnover Signaling Motif Controls the  
796 Stimulus-Sensitivity of Stress Response Pathways. *PLoS Comput Biol.* 2013;9.  
797 doi:10.1371/journal.pcbi.1002932
- 798 22. Hoor M ten. “ Are we there yet ?” ... Can Equilibrium ever be Achieved ? *ChemEd NZ.*  
799 2009; 7–8. Available: <http://nzic.org.nz/chemed-nz/issue-archive.html>
- 800 23. Invitrogen Corporation. Theory of Binding Data Analysis. *Fluoresc Polariz Tech Resour*  
801 *Guid Chapter 7.* 2008; 1–18. Available: [www.invitrogen.com/drugdiscovery](http://www.invitrogen.com/drugdiscovery)
- 802 24. Grefhorst A, Mcnutt MC, Lagace TA, Horton JD. Plasma PCSK9 preferentially reduces

- 803 liver LDL receptors in mice. 2008;49: 1303–1311. doi:10.1194/jlr.M800027-JLR200
- 804 25. Benjannet S, Rhainds D, Essalmani R, Mayne J, Wickham L, Jin W, et al. NARC-  
805 1/PCSK9 and Its Natural Mutants ZYMOGEN CLEAVAGE AND EFFECTS ON THE  
806 LOW DENSITY LIPOPROTEIN (LDL) RECEPTOR AND LDL CHOLESTEROL\*.  
807 2004; doi:10.1074/jbc.M409699200
- 808 26. Schulz R, Schluter KD, Laufs U. Molecular and cellular function of the proprotein  
809 convertase subtilisin/kexin type 9 (PCSK9). *Basic Res Cardiol.* 2015;110.  
810 doi:10.1007/s00395-015-0463-z
- 811 27. Gustafsen C, Olsen D, Vilstrup J, Lund S, Reinhardt A, Wellner N, et al. Heparan sulfate  
812 proteoglycans present PCSK9 to the LDL receptor. *Nat Commun.* Springer US; 2017;8:  
813 1–14. doi:10.1038/s41467-017-00568-7
- 814 28. Stork D, Timin EN, Berjukow S, Huber C, Hohaus a, Auer M, et al. State dependent  
815 dissociation of HERG channel inhibitors. *Br J Pharmacol.* 2007;151: 1368–1376.  
816 doi:10.1038/sj.bjp.0707356
- 817 29. Dahl G, Akerud T. Pharmacokinetics and the drug-target residence time concept. *Drug*  
818 *Discov Today.* 2013;18: 697–707. doi:10.1016/j.drudis.2013.02.010
- 819 30. Folmer RHAA. Drug target residence time: a misleading concept. *Drug Discov Today.*  
820 2017;00: 1–5. doi:10.1016/j.drudis.2017.07.016
- 821 31. Annunziata CM, Davis RE, Demchenko Y, Bellamy W, Zhan F, Lenz G, et al. Frequent  
822 engagement of the classical and alternative NF- $\kappa$ B pathways by diverse genetic  
823 abnormalities in multiple myeloma. *Cancer Cell.* 2007;12: 115–130.

824           doi:10.1016/j.ccr.2007.07.004.Frequent

825    32.    Copeland RA, Pompliano DL, Meek TD. Drug–target residence time and its implications

826           for lead optimization. *Nat Rev Drug Discov.* 2006;5: 730–739. doi:10.1038/nrd2082

827    33.    Schoop A, Dey F. On-rate based optimization of structure-kinetic relationship - Surfing

828           the kinetic map. *Drug Discov Today Technol.* Elsevier Ltd; 2015;17: 9–15.

829           doi:10.1016/j.ddtec.2015.08.003

830

$L_0 = 1e-11$  (M) ;  $k_{on} = 1000$  ( $M^{-1} \cdot s^{-1}$ ) ;  $k_{off} = 0.1$  ( $s^{-1}$ ) ;  $k_i = 1e-08$  ( $s^{-1}$ ) ;  $k_{-i} = 1e-08$  ( $s^{-1}$ ) ;

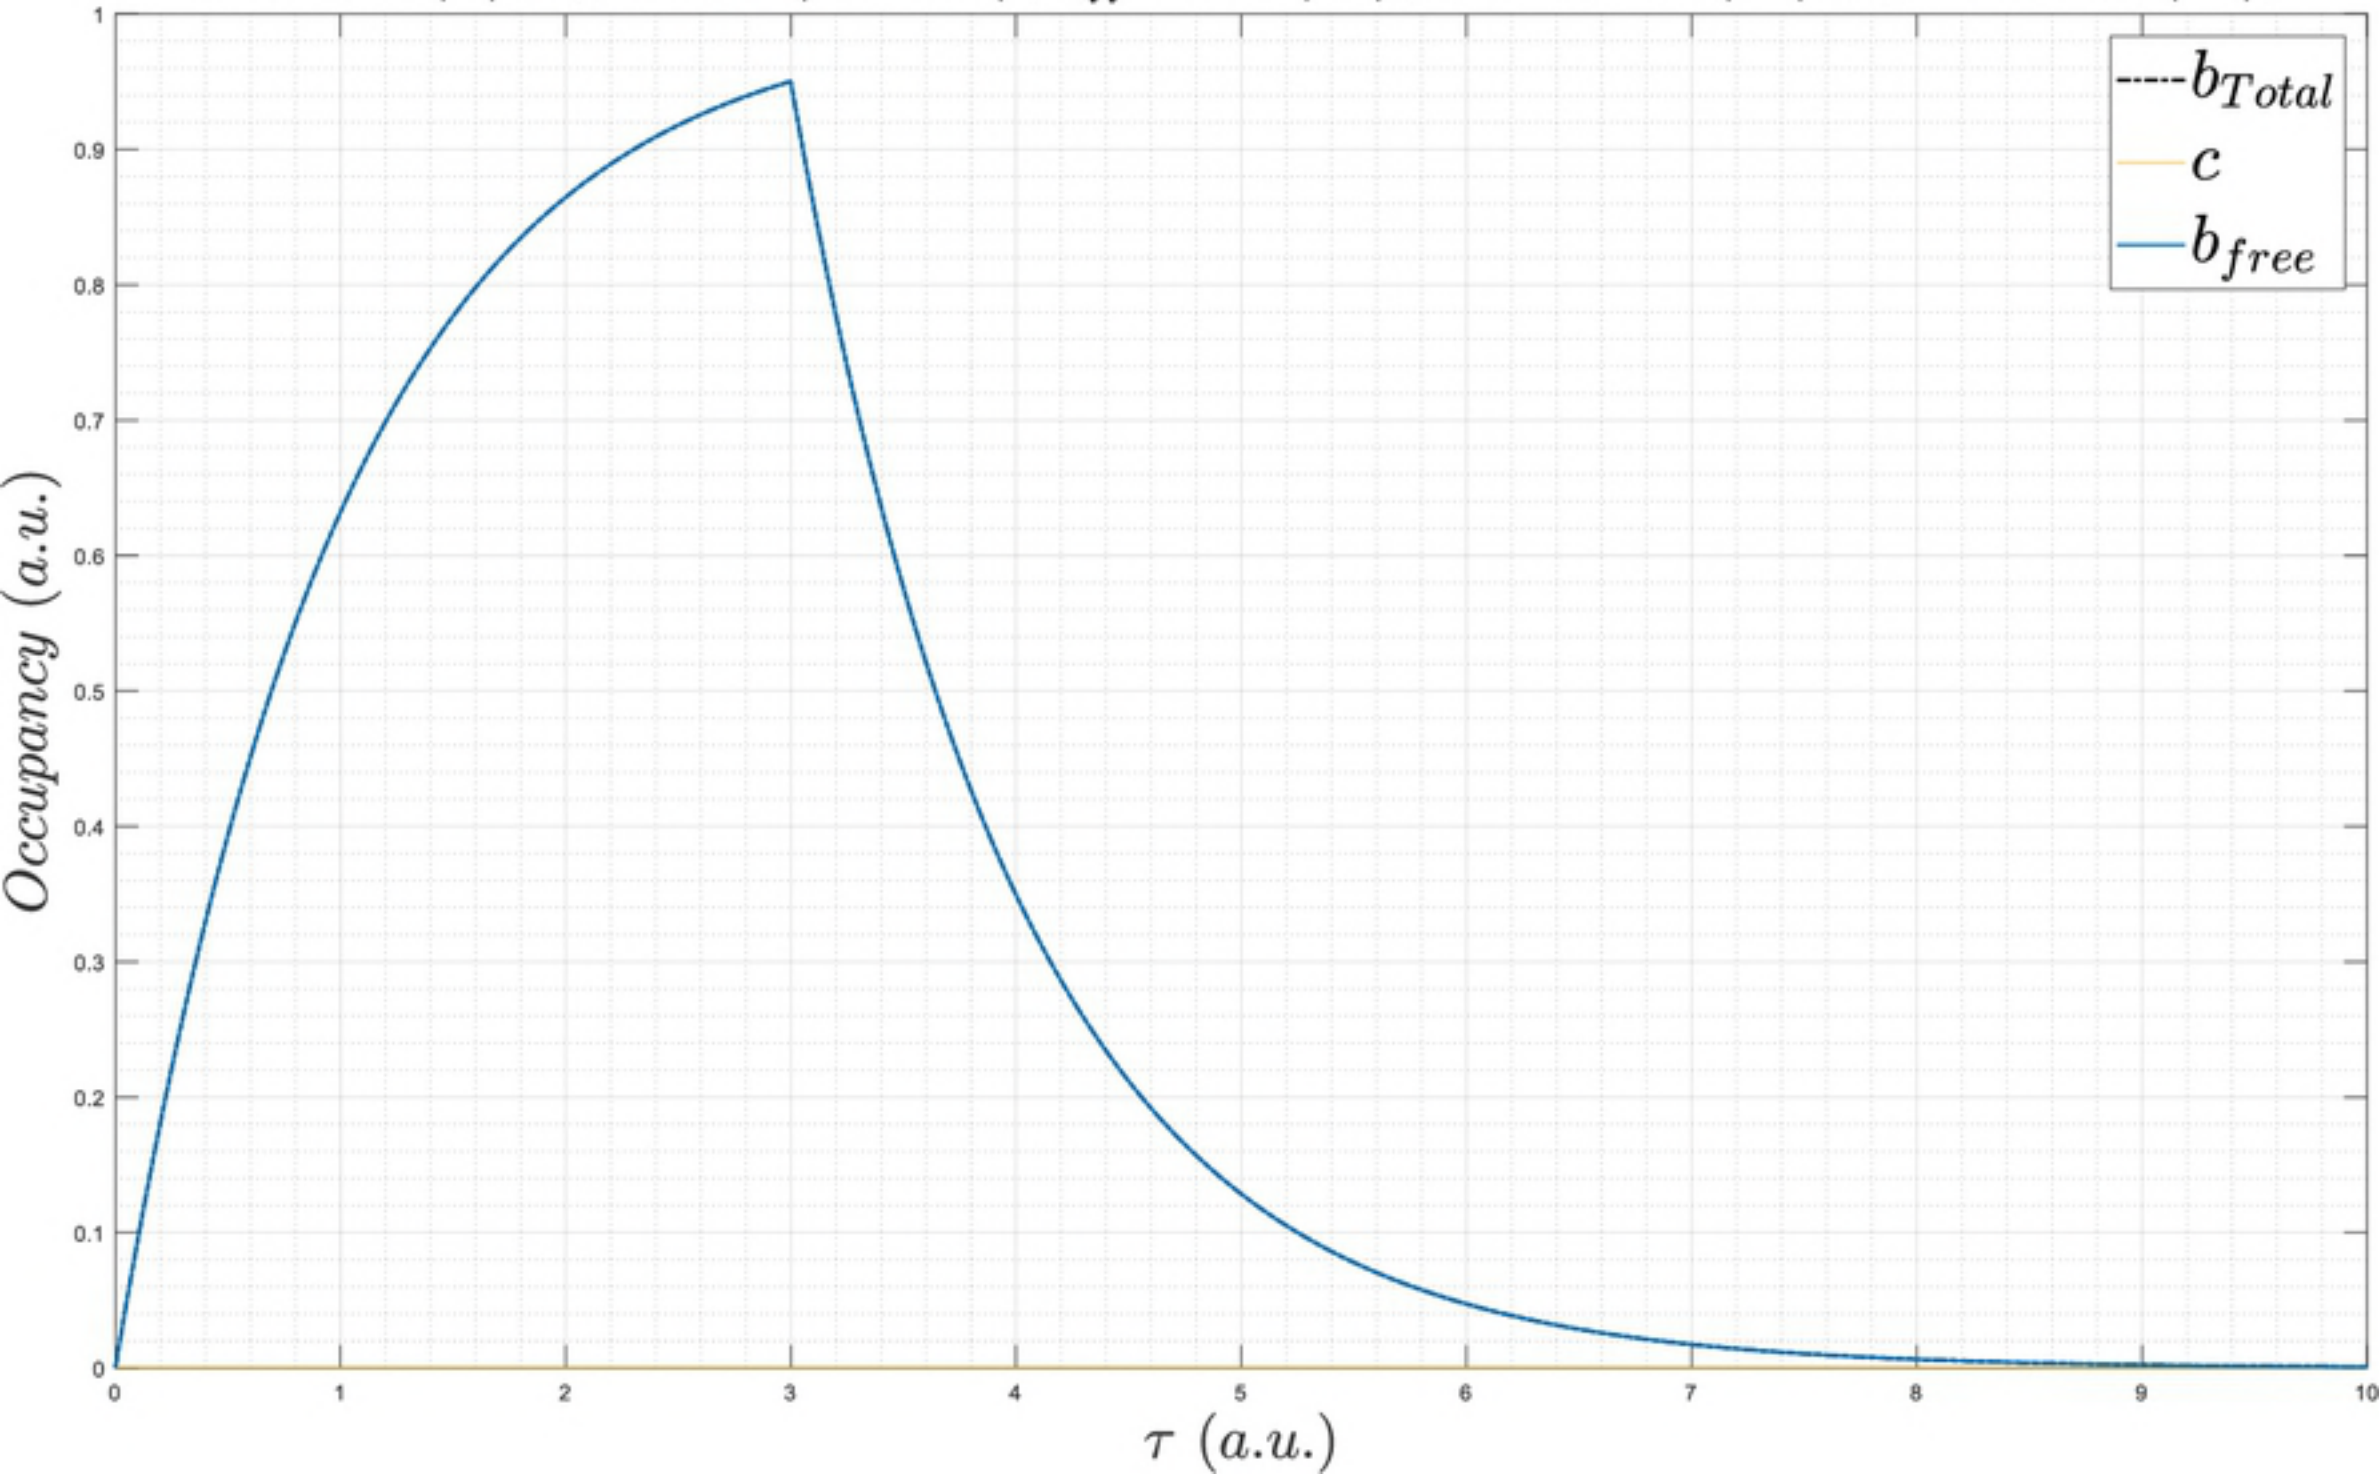

$$k_{on} = 10^0 (M^{-1} \cdot s^{-1}) ; k_{off} = 10^{-2} (s^{-1}) ; k_i = 10^{-3} (s^{-1}) ; k_{-i} = 10^{-3} (s^{-1}) ;$$

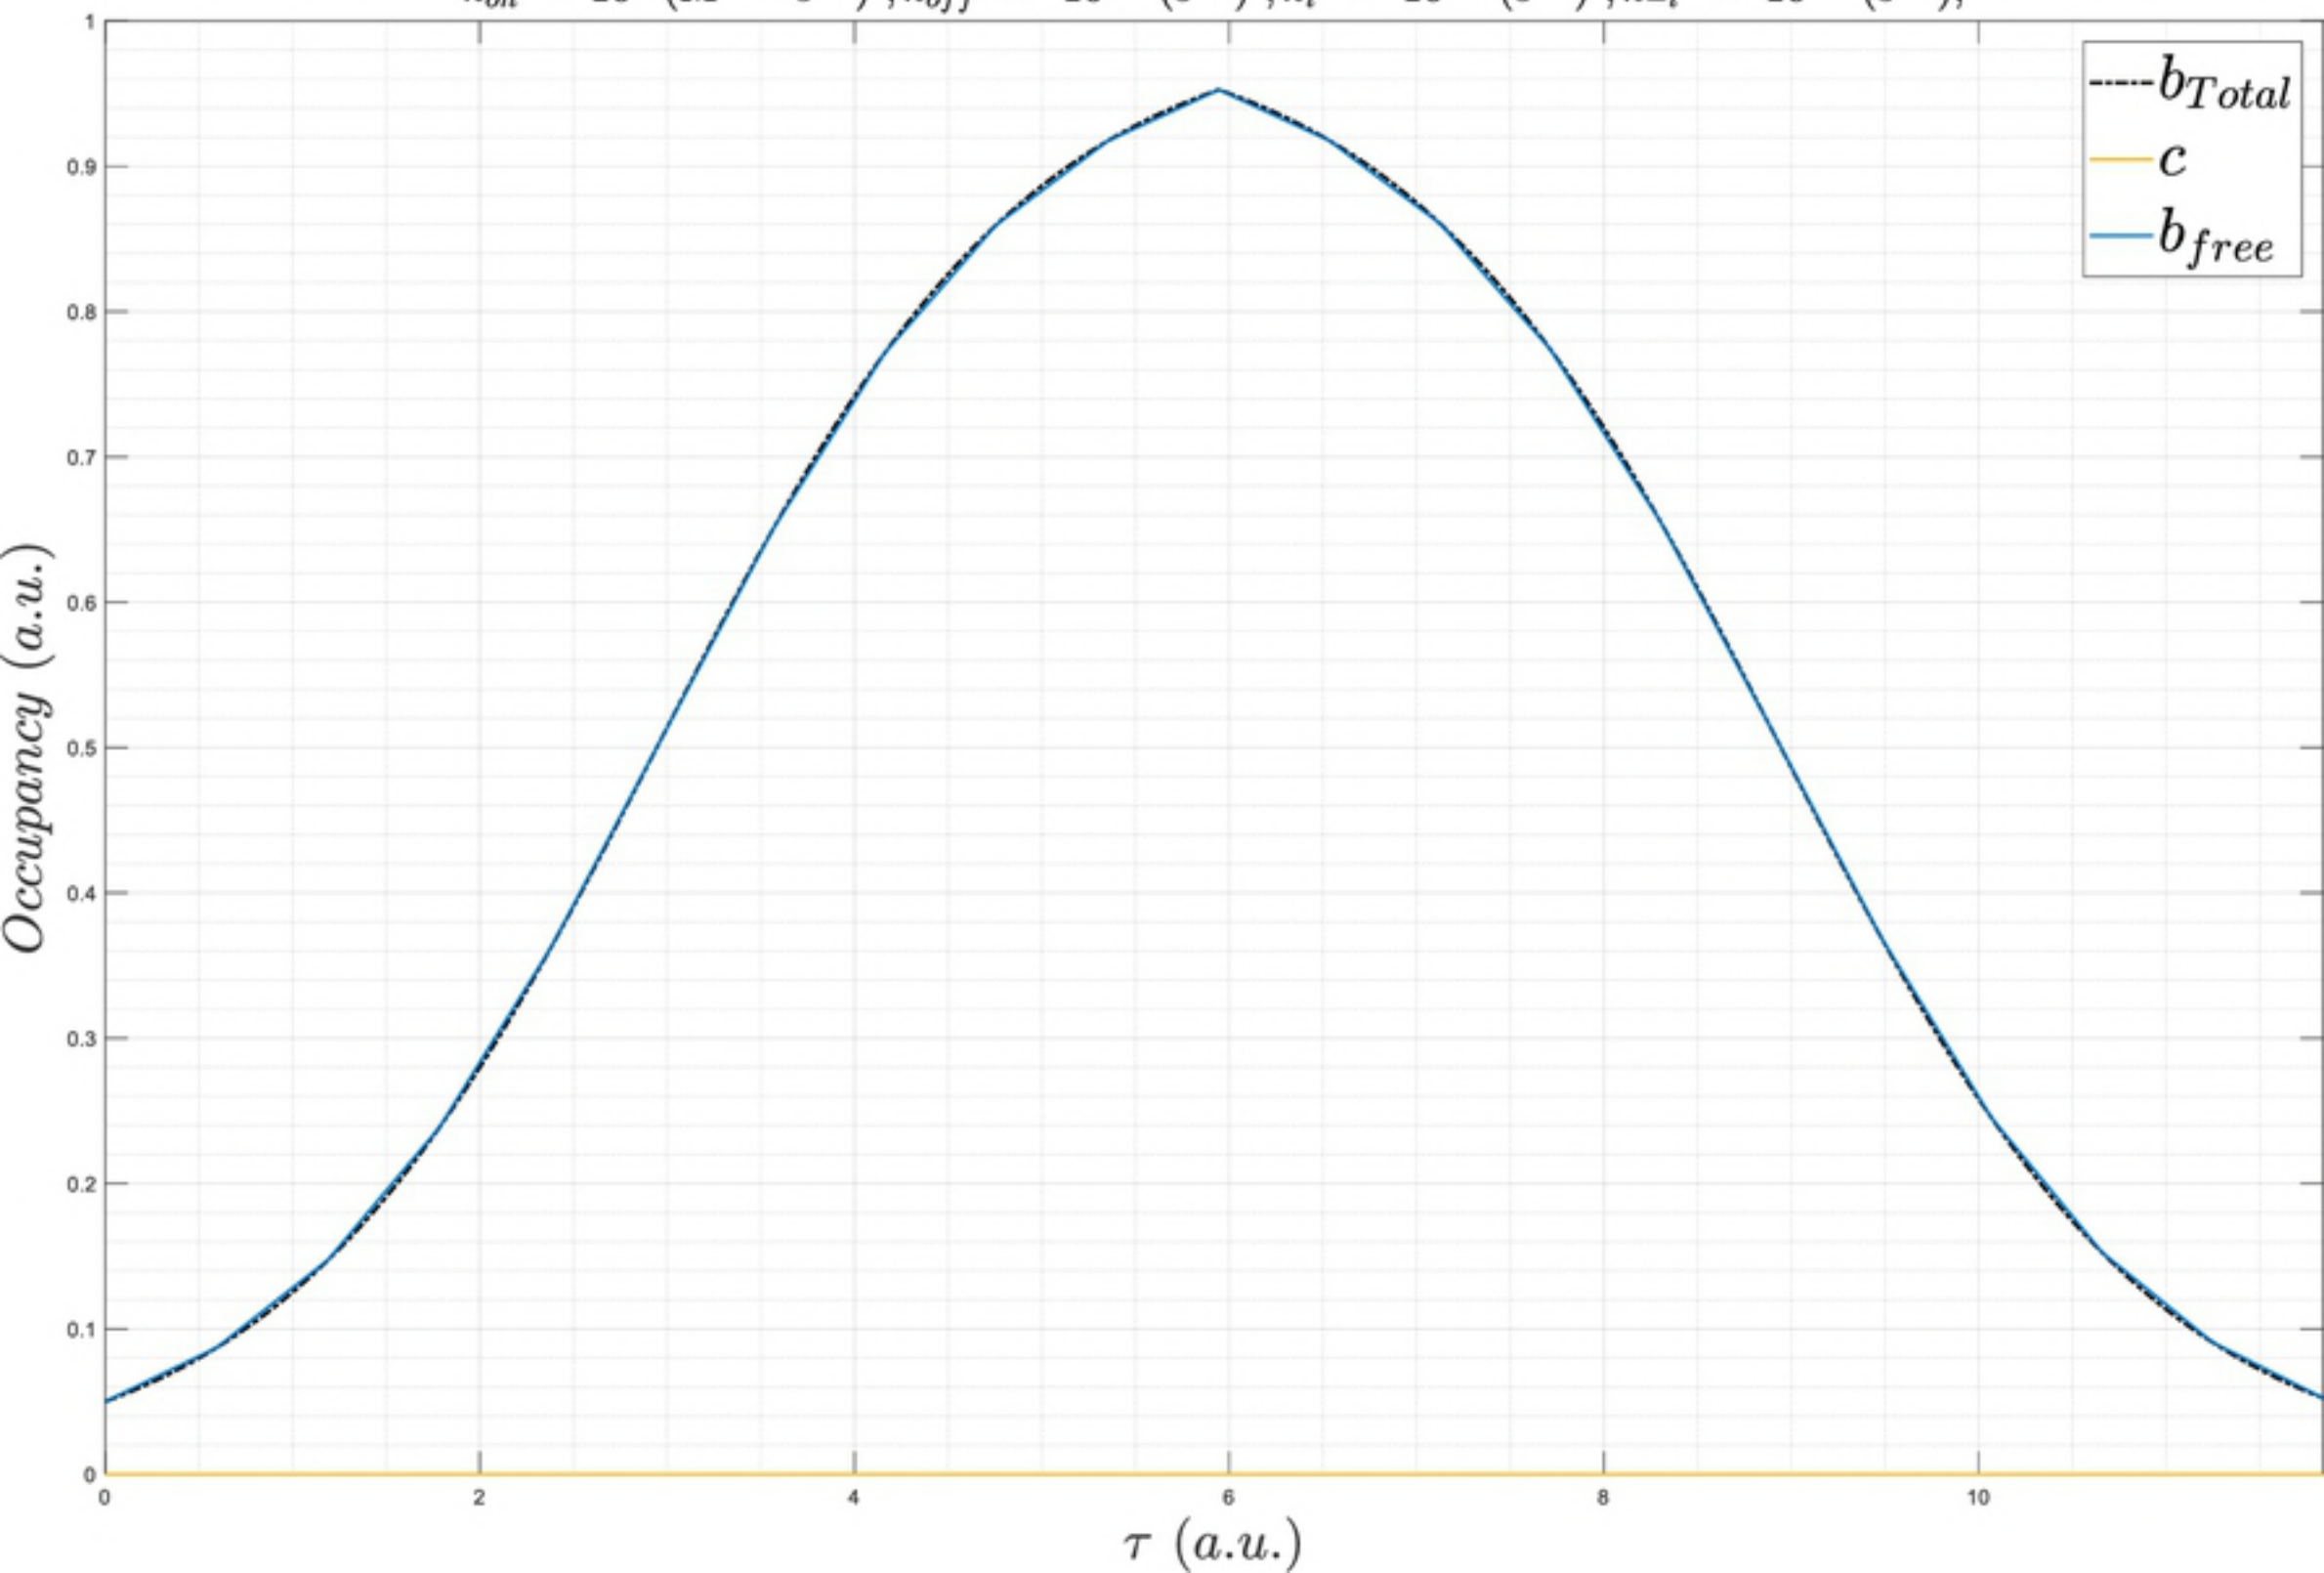



$L_0 = 1e-09$  (M) ;  $k_{on} = 1000000000$  ( $M^{-1} \cdot s^{-1}$ ) ;  $k_{off} = 1$  ( $s^{-1}$ ) ;  $k_i = 1e-08$  ( $s^{-1}$ ) ;  $k_{-i} = 1e-08$  ( $s^{-1}$ ) ;

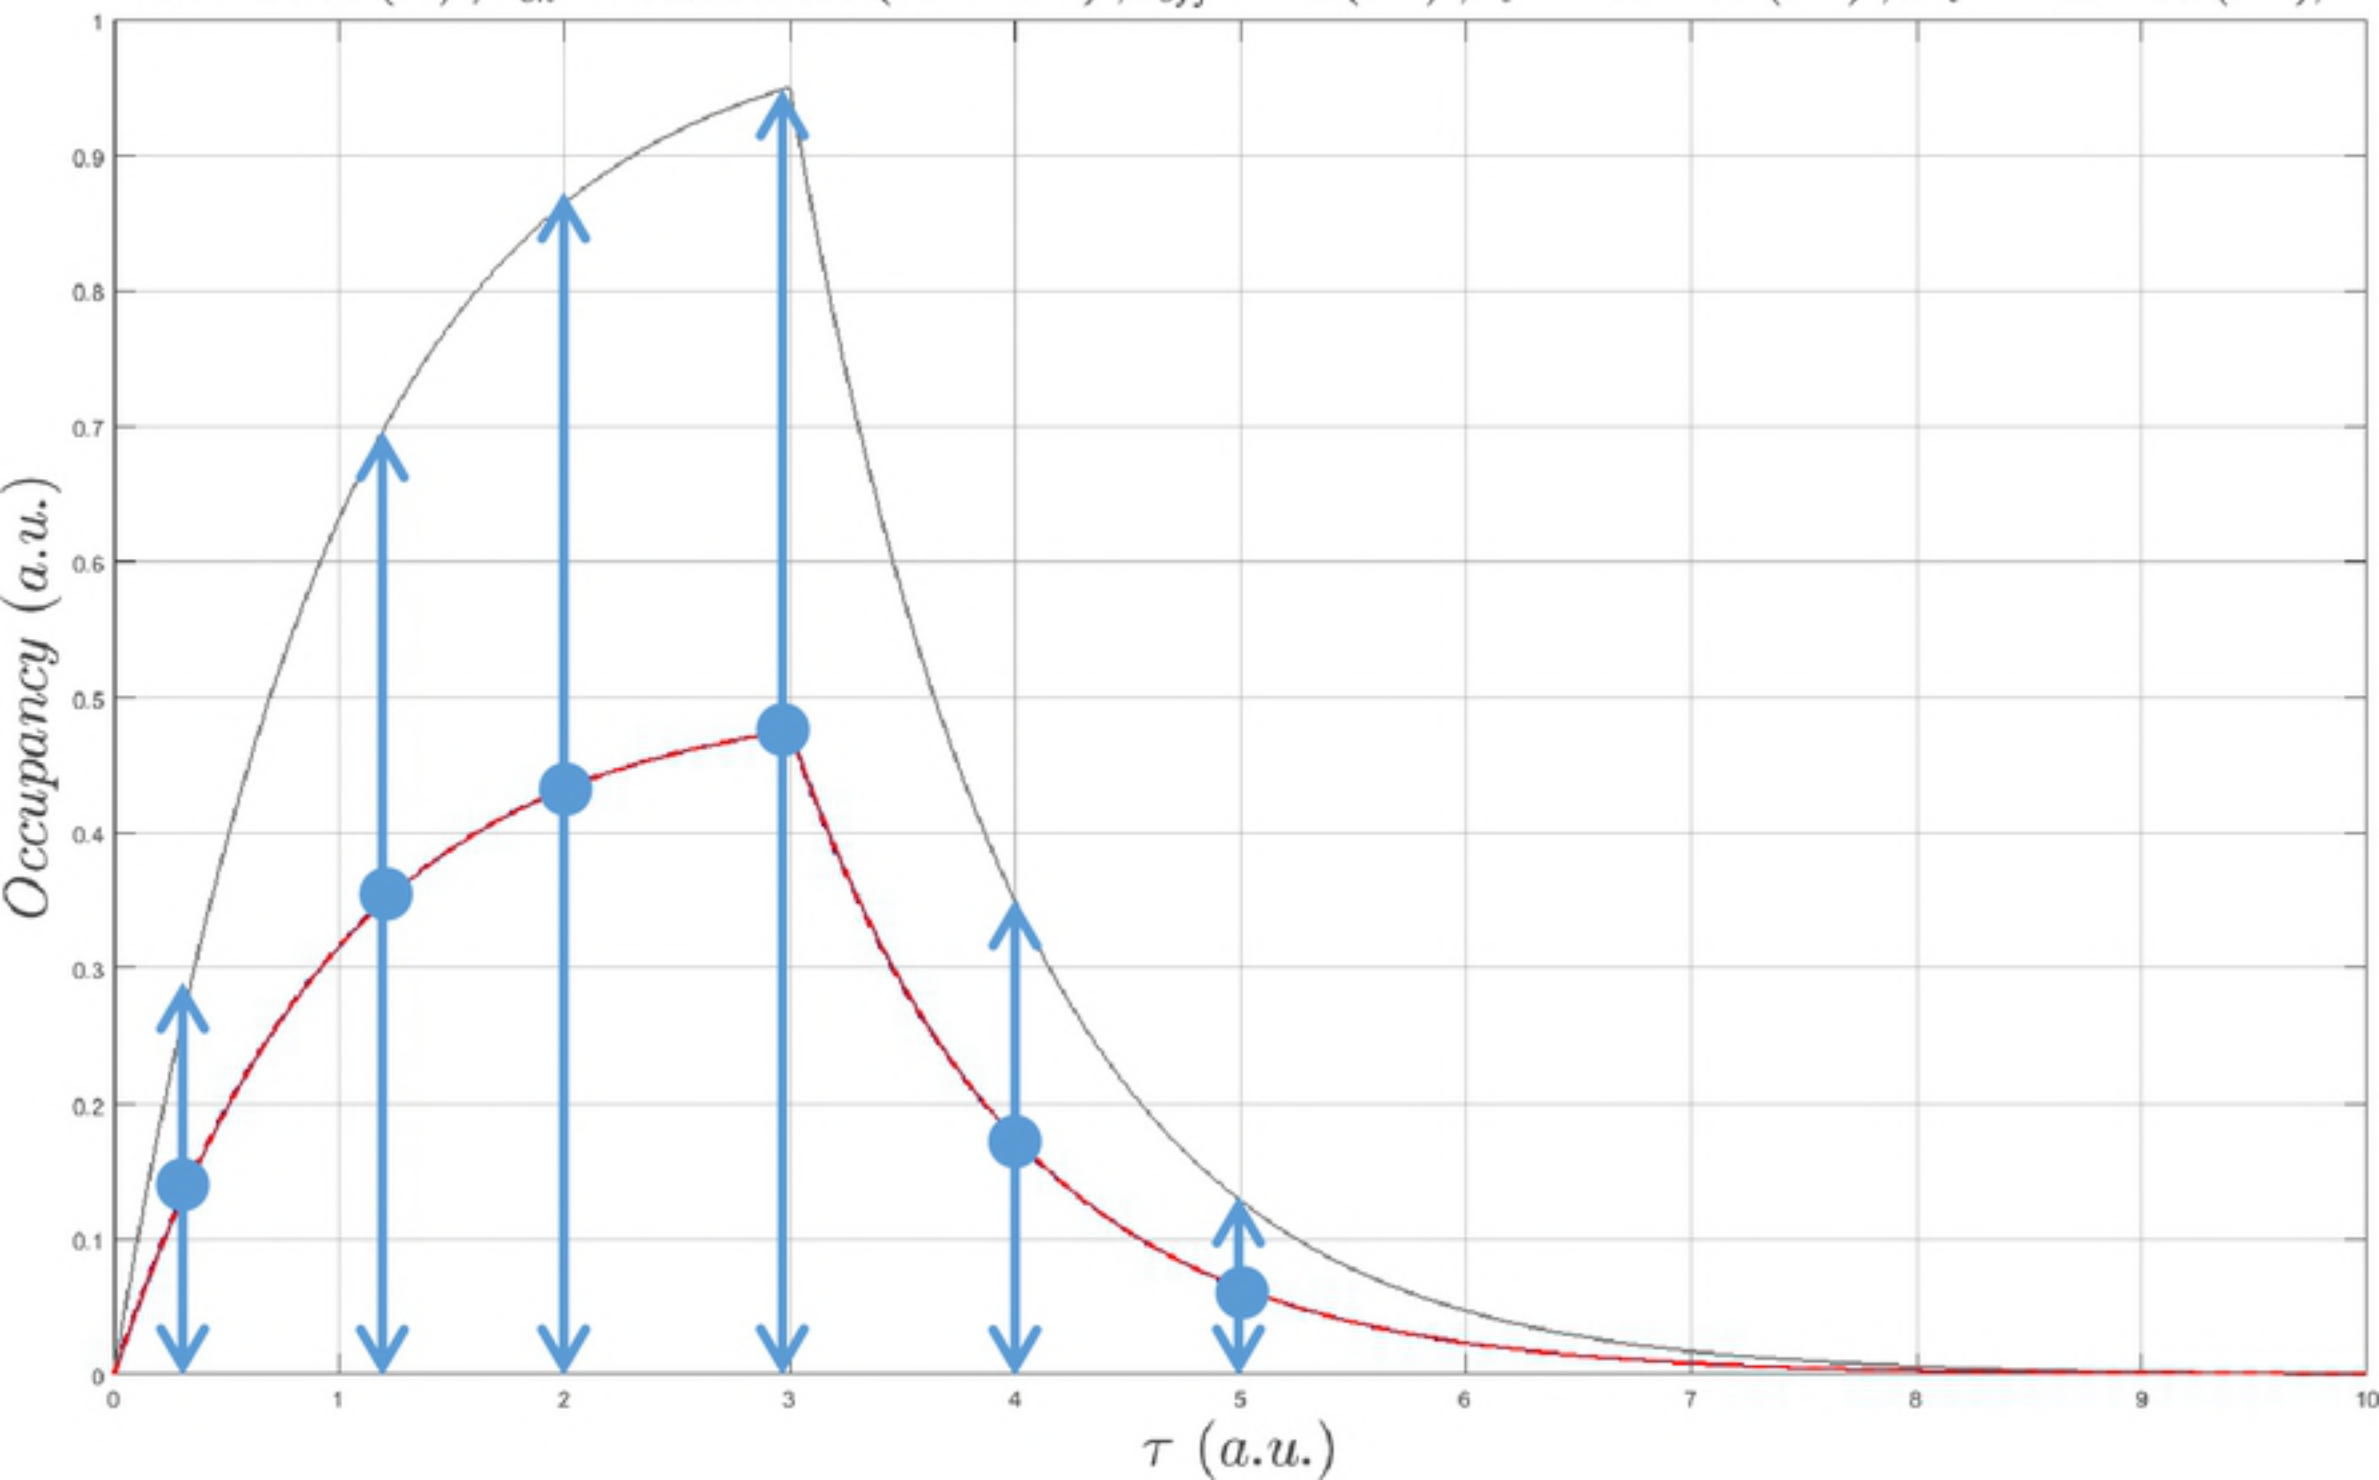



$L_0 = 1.9e-08$  (M) ;  $k_{on} = 1000000000$  ( $M^{-1} \cdot s^{-1}$ ) ;  $k_{off} = 1$  ( $s^{-1}$ ) ;  $k_i = 1e-08$  ( $s^{-1}$ ) ;  $k_{-i} = 1e-08$  ( $s^{-1}$ ) ;

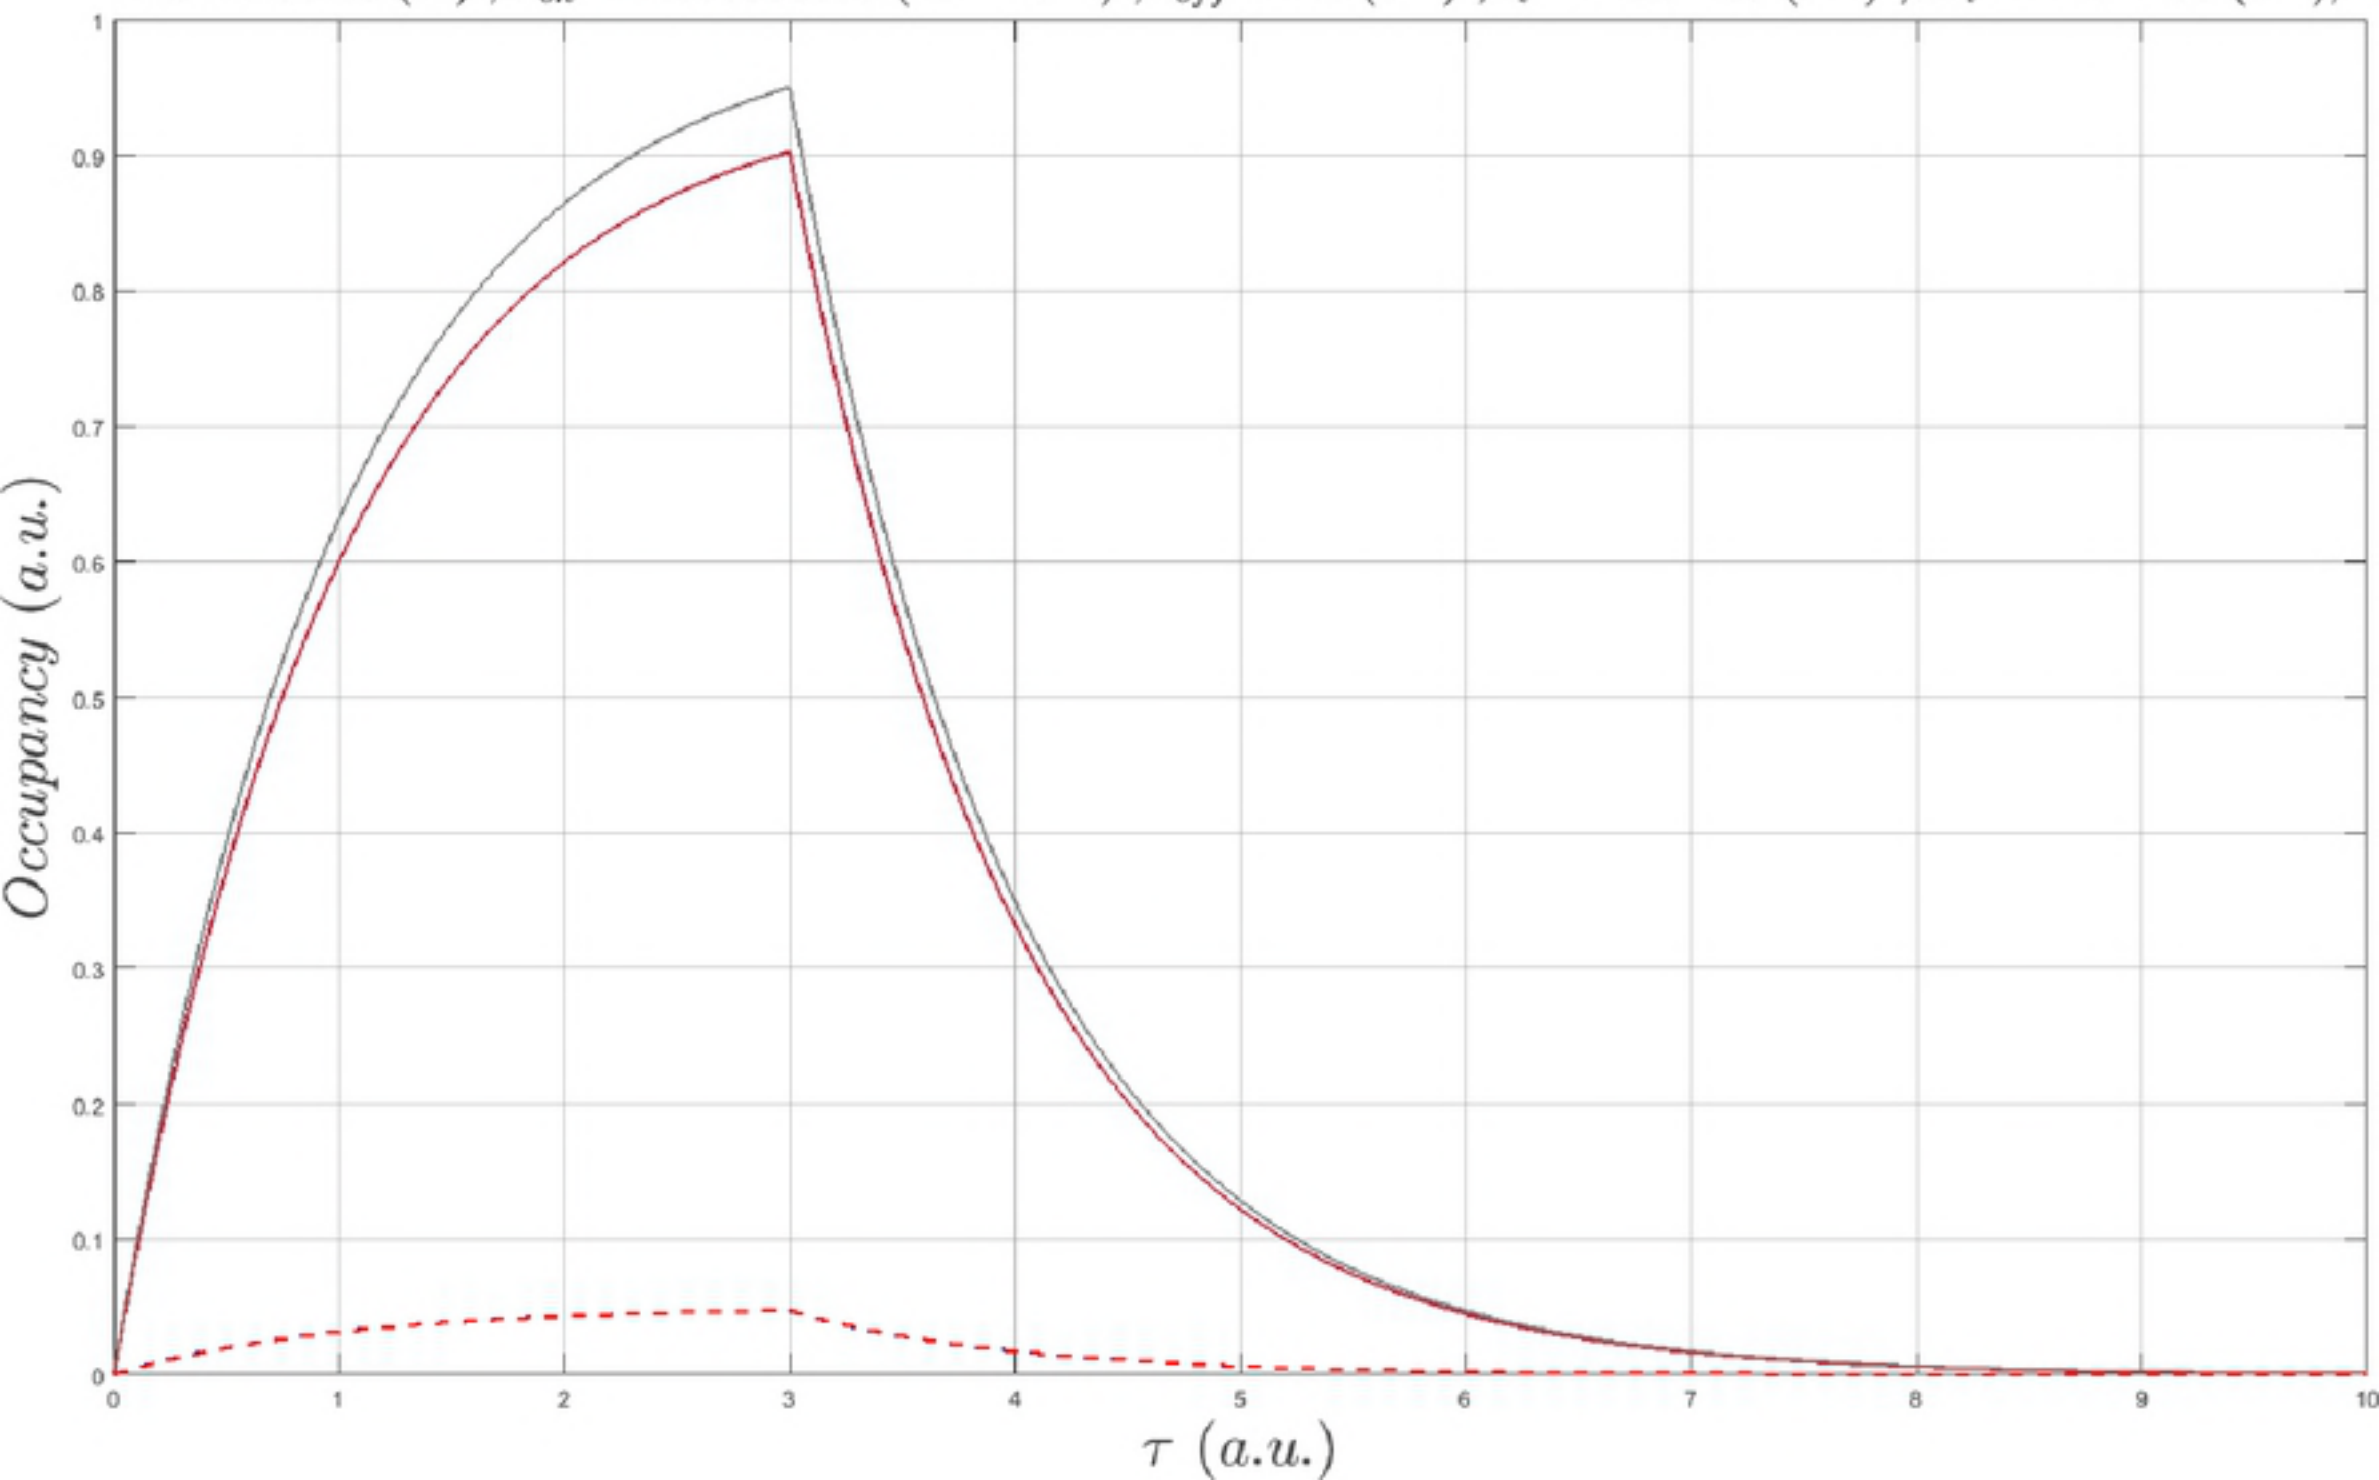

$Lo = 1e-09$  (M) ;  $k_{on} = 100000$  ( $M^{-1} \cdot s^{-1}$ ) ;  $k_{off} = 0.0001$  ( $s^{-1}$ ) ;  $k_i = 1e-07$  ( $s^{-1}$ ) ;  $k_{-i} = 1e-07$  ( $s^{-1}$ ) ;

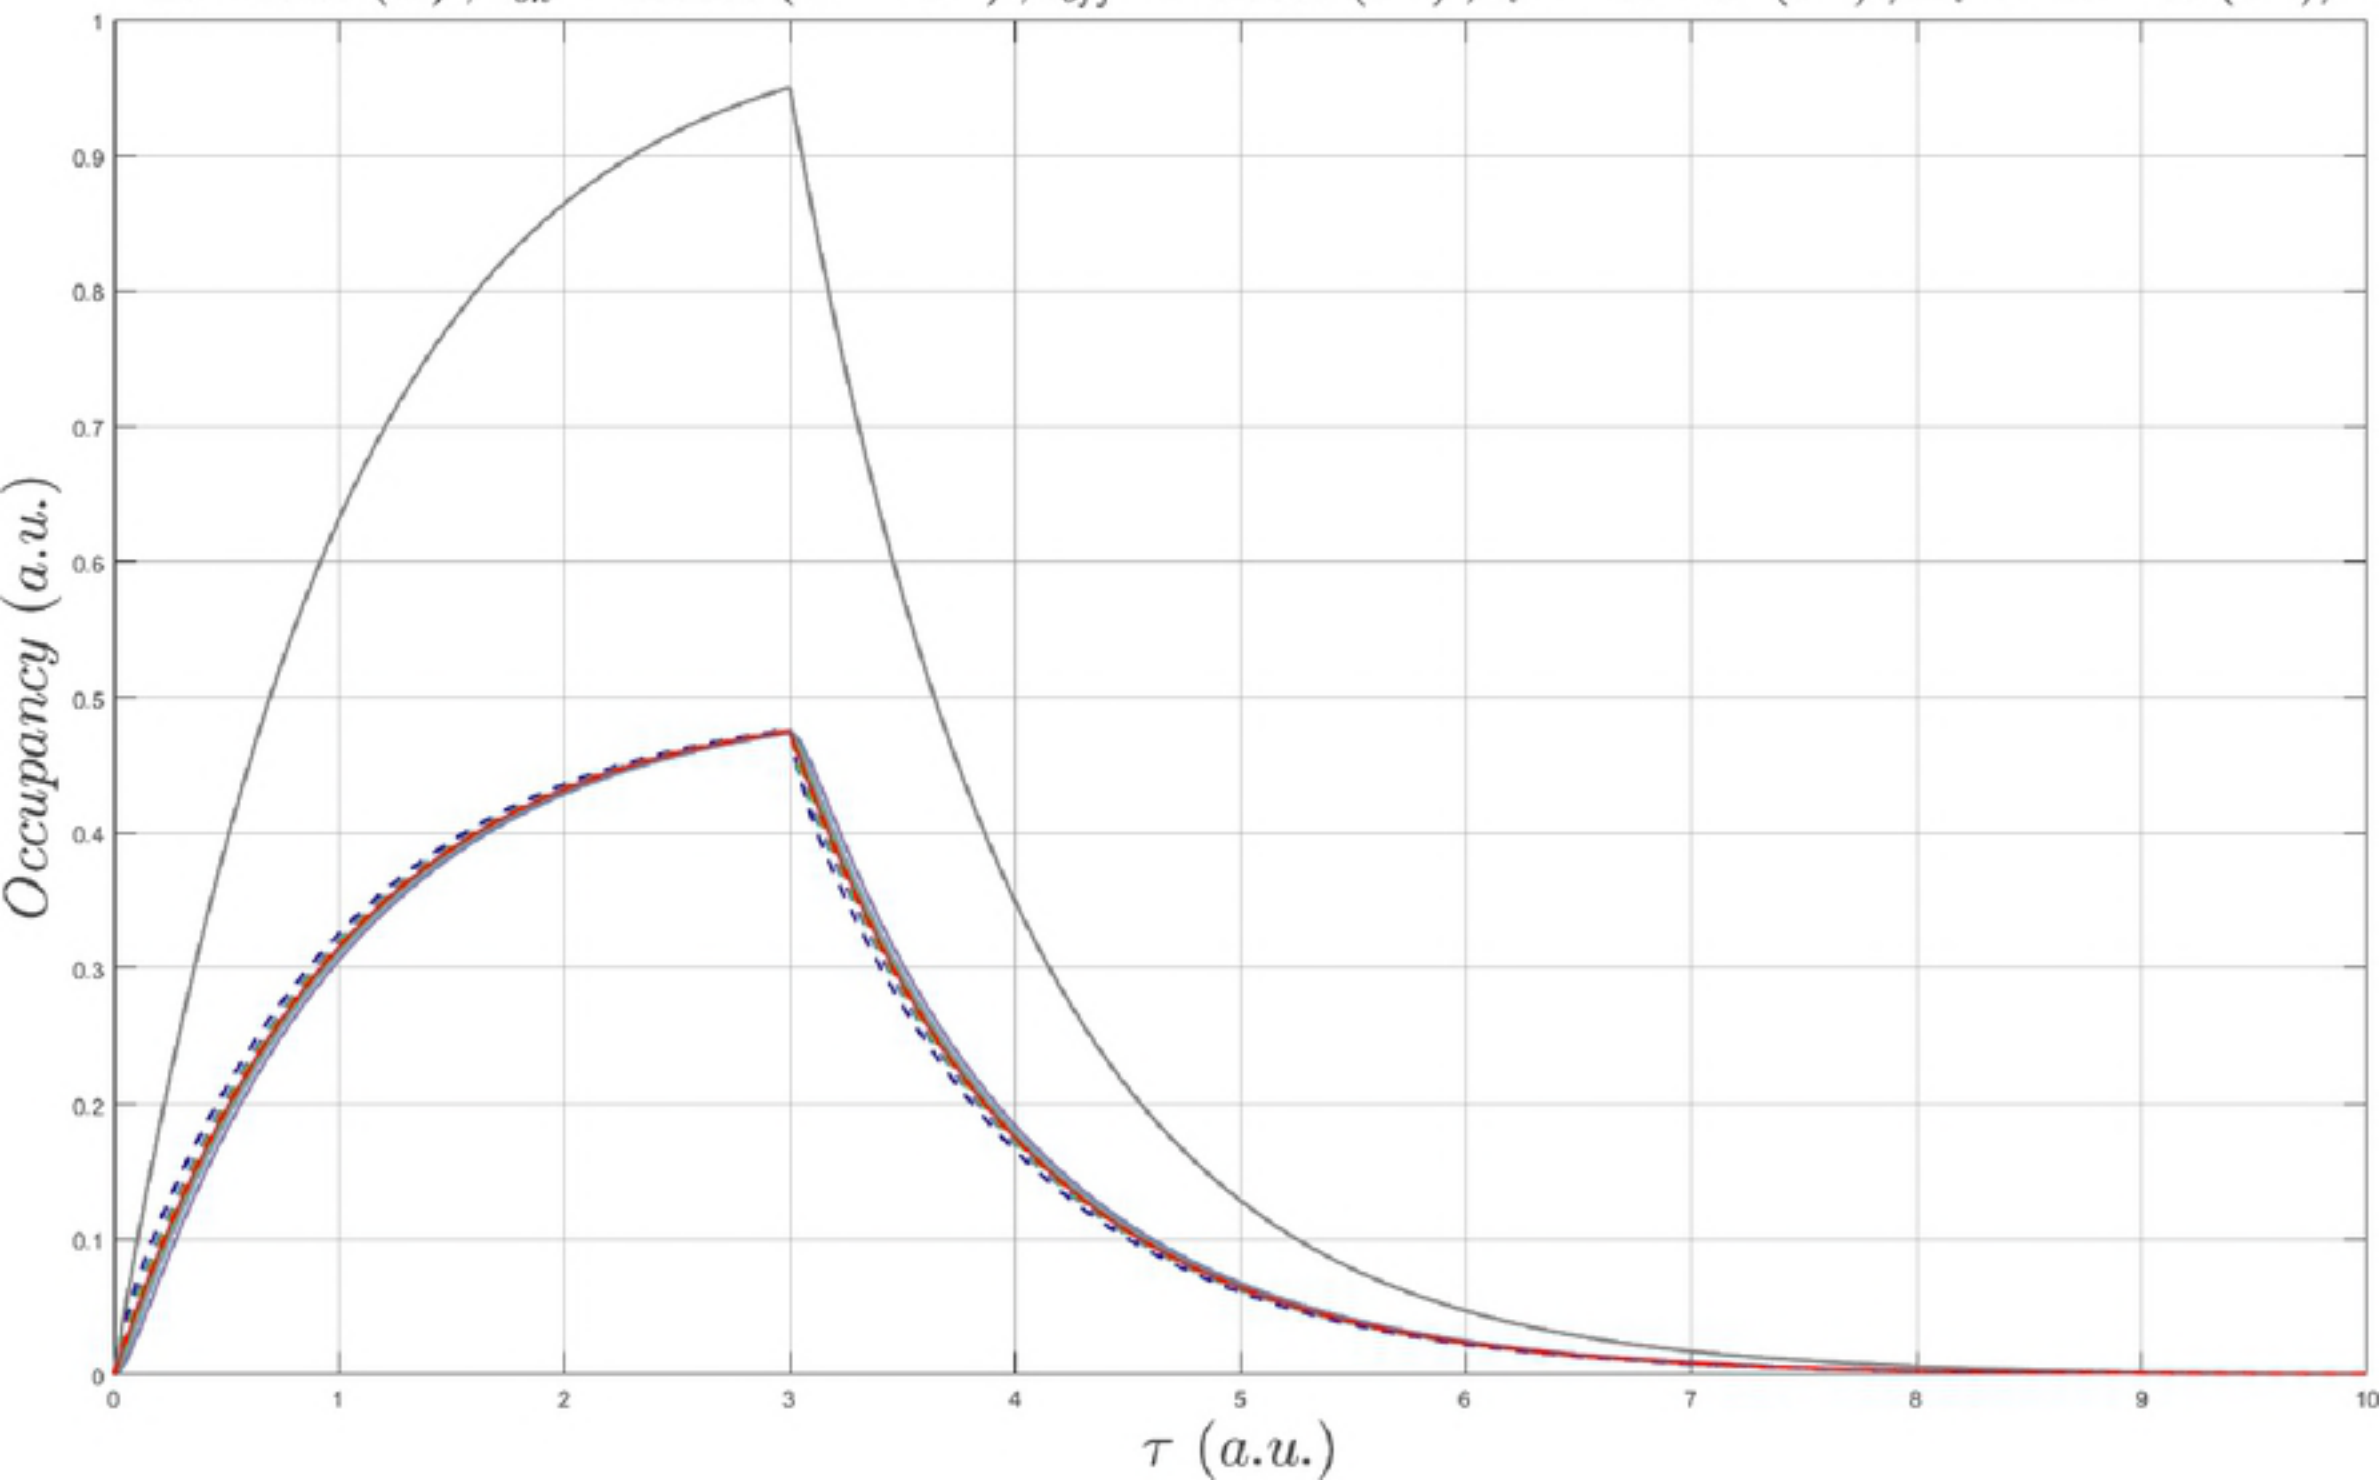



$Lo = 1e-09$  (M) ;  $k_{on} = 100000$  ( $M^{-1} \cdot s^{-1}$ ) ;  $k_{off} = 0.0001$  ( $s^{-1}$ ) ;  $k_i = 1e-06$  ( $s^{-1}$ ) ;  $k_{-i} = 1e-06$  ( $s^{-1}$ ) ;

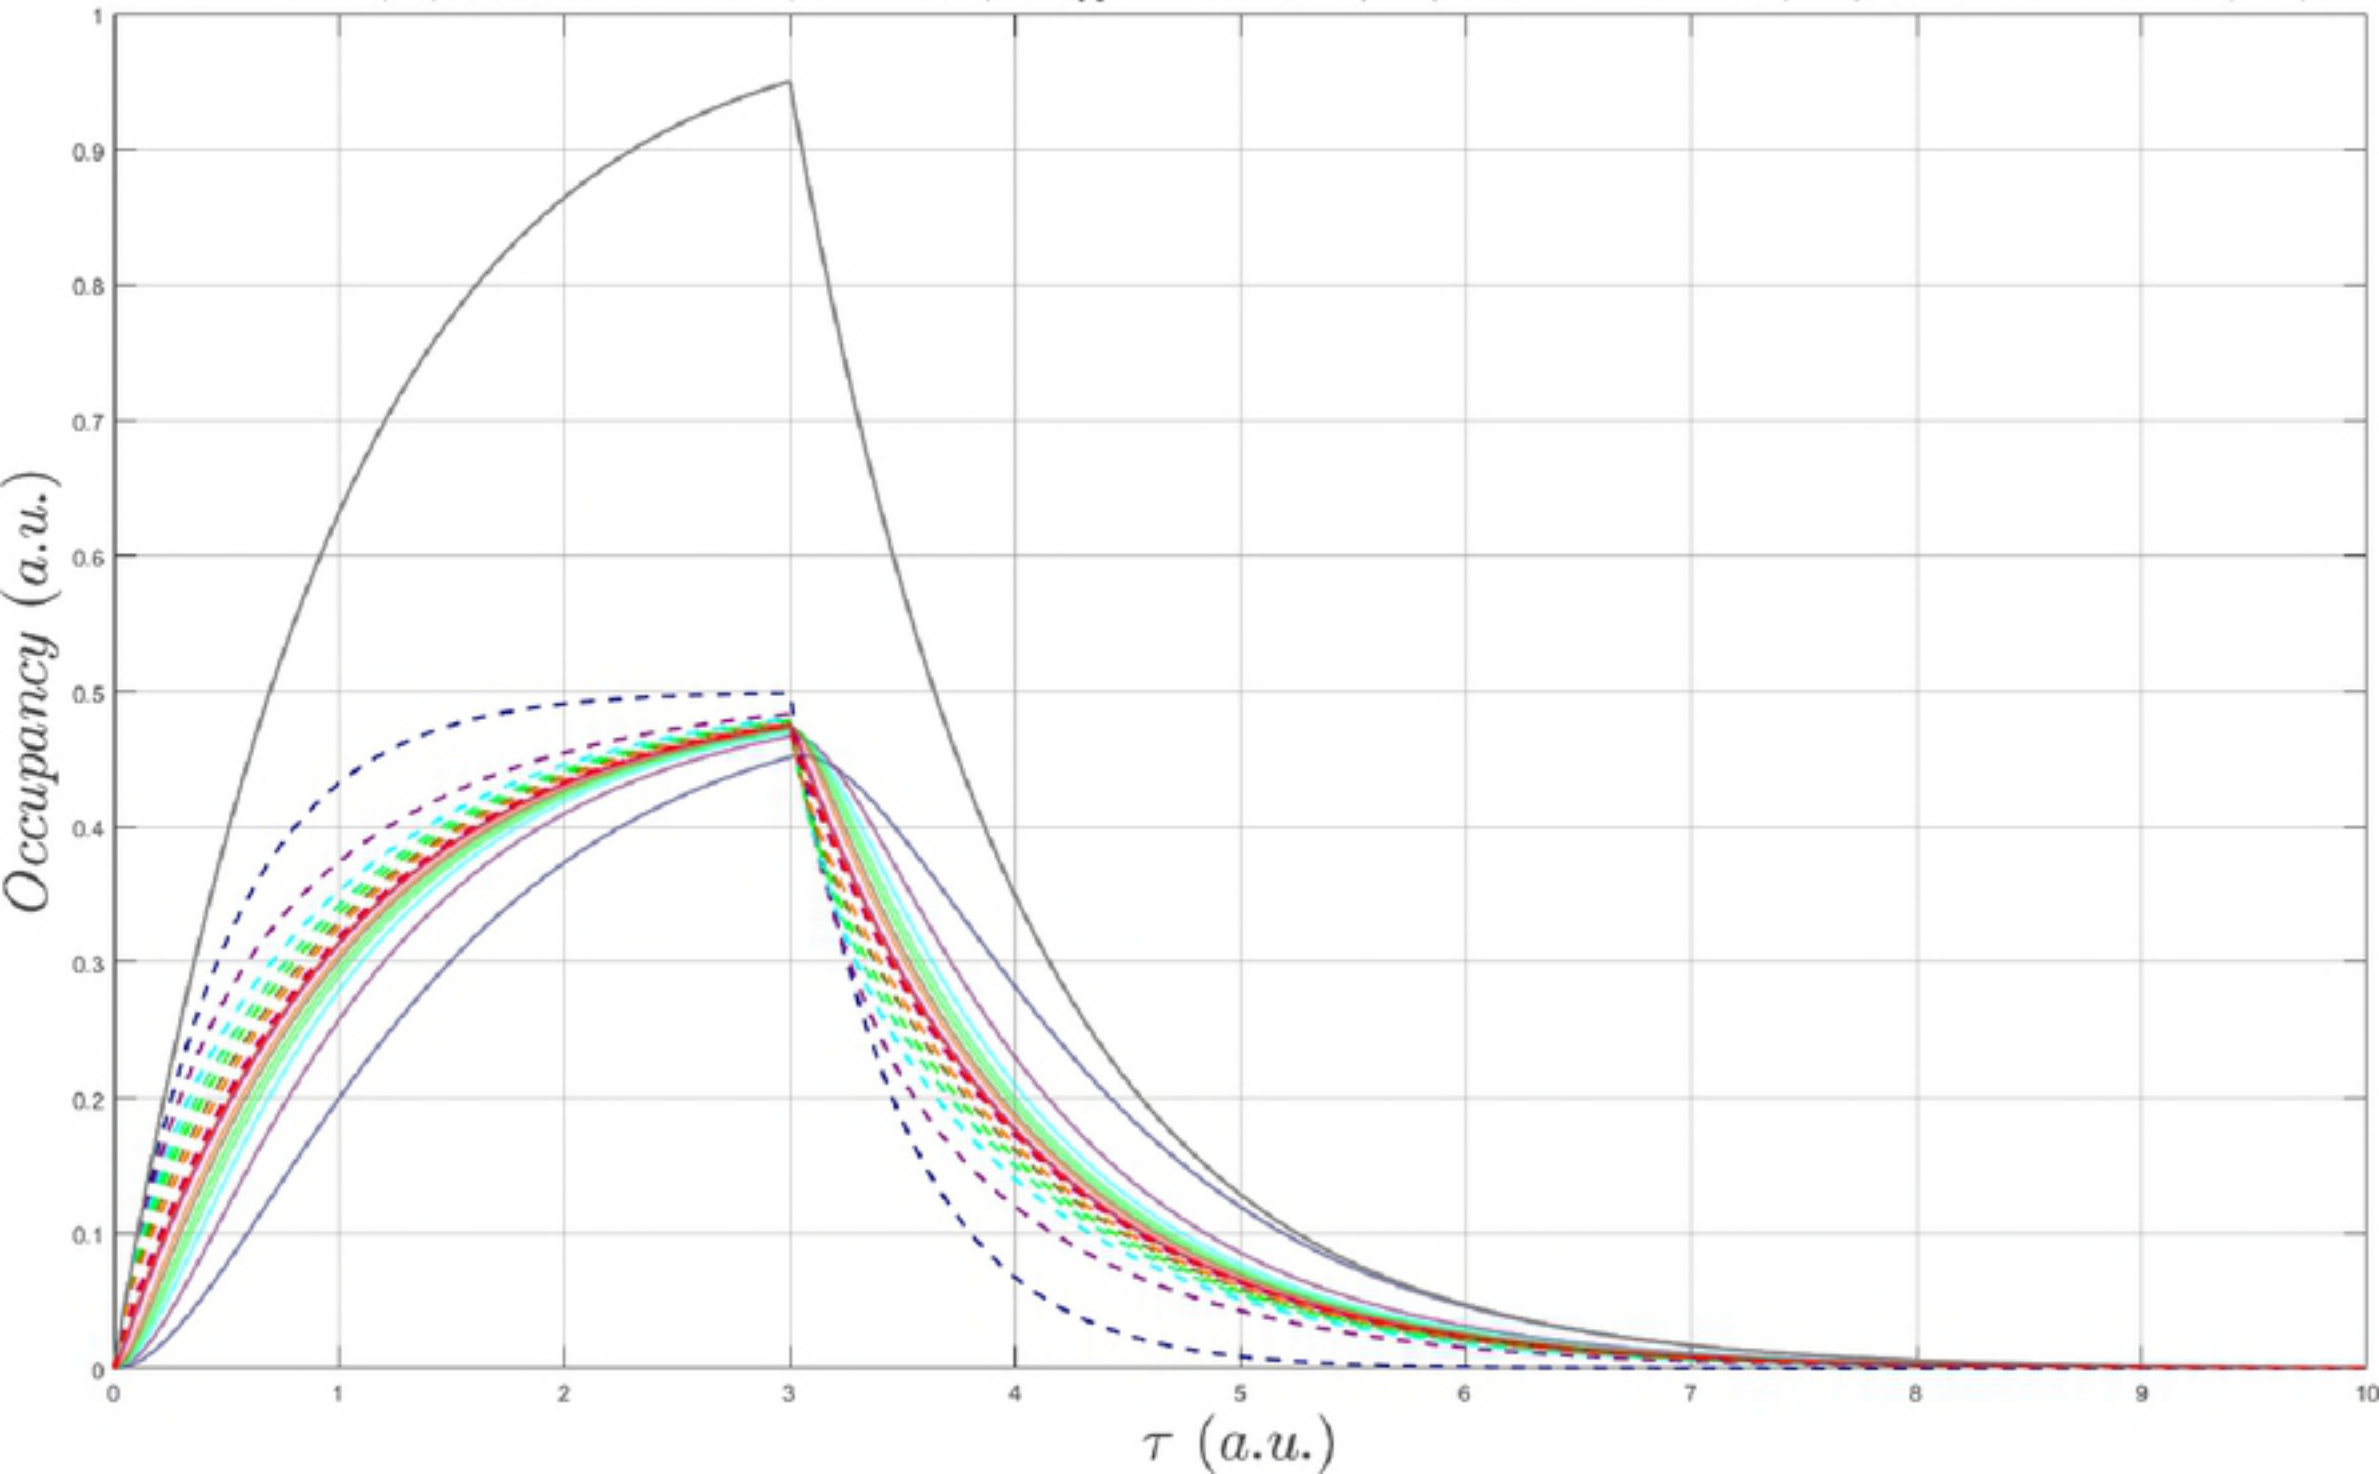

$Lo = 1e-09$  (M) ;  $k_{on} = 100000$  ( $M^{-1} \cdot s^{-1}$ ) ;  $k_{off} = 0.0001$  ( $s^{-1}$ ) ;  $k_i = 5e-06$  ( $s^{-1}$ ) ;  $k_{-i} = 5e-06$  ( $s^{-1}$ ) ;

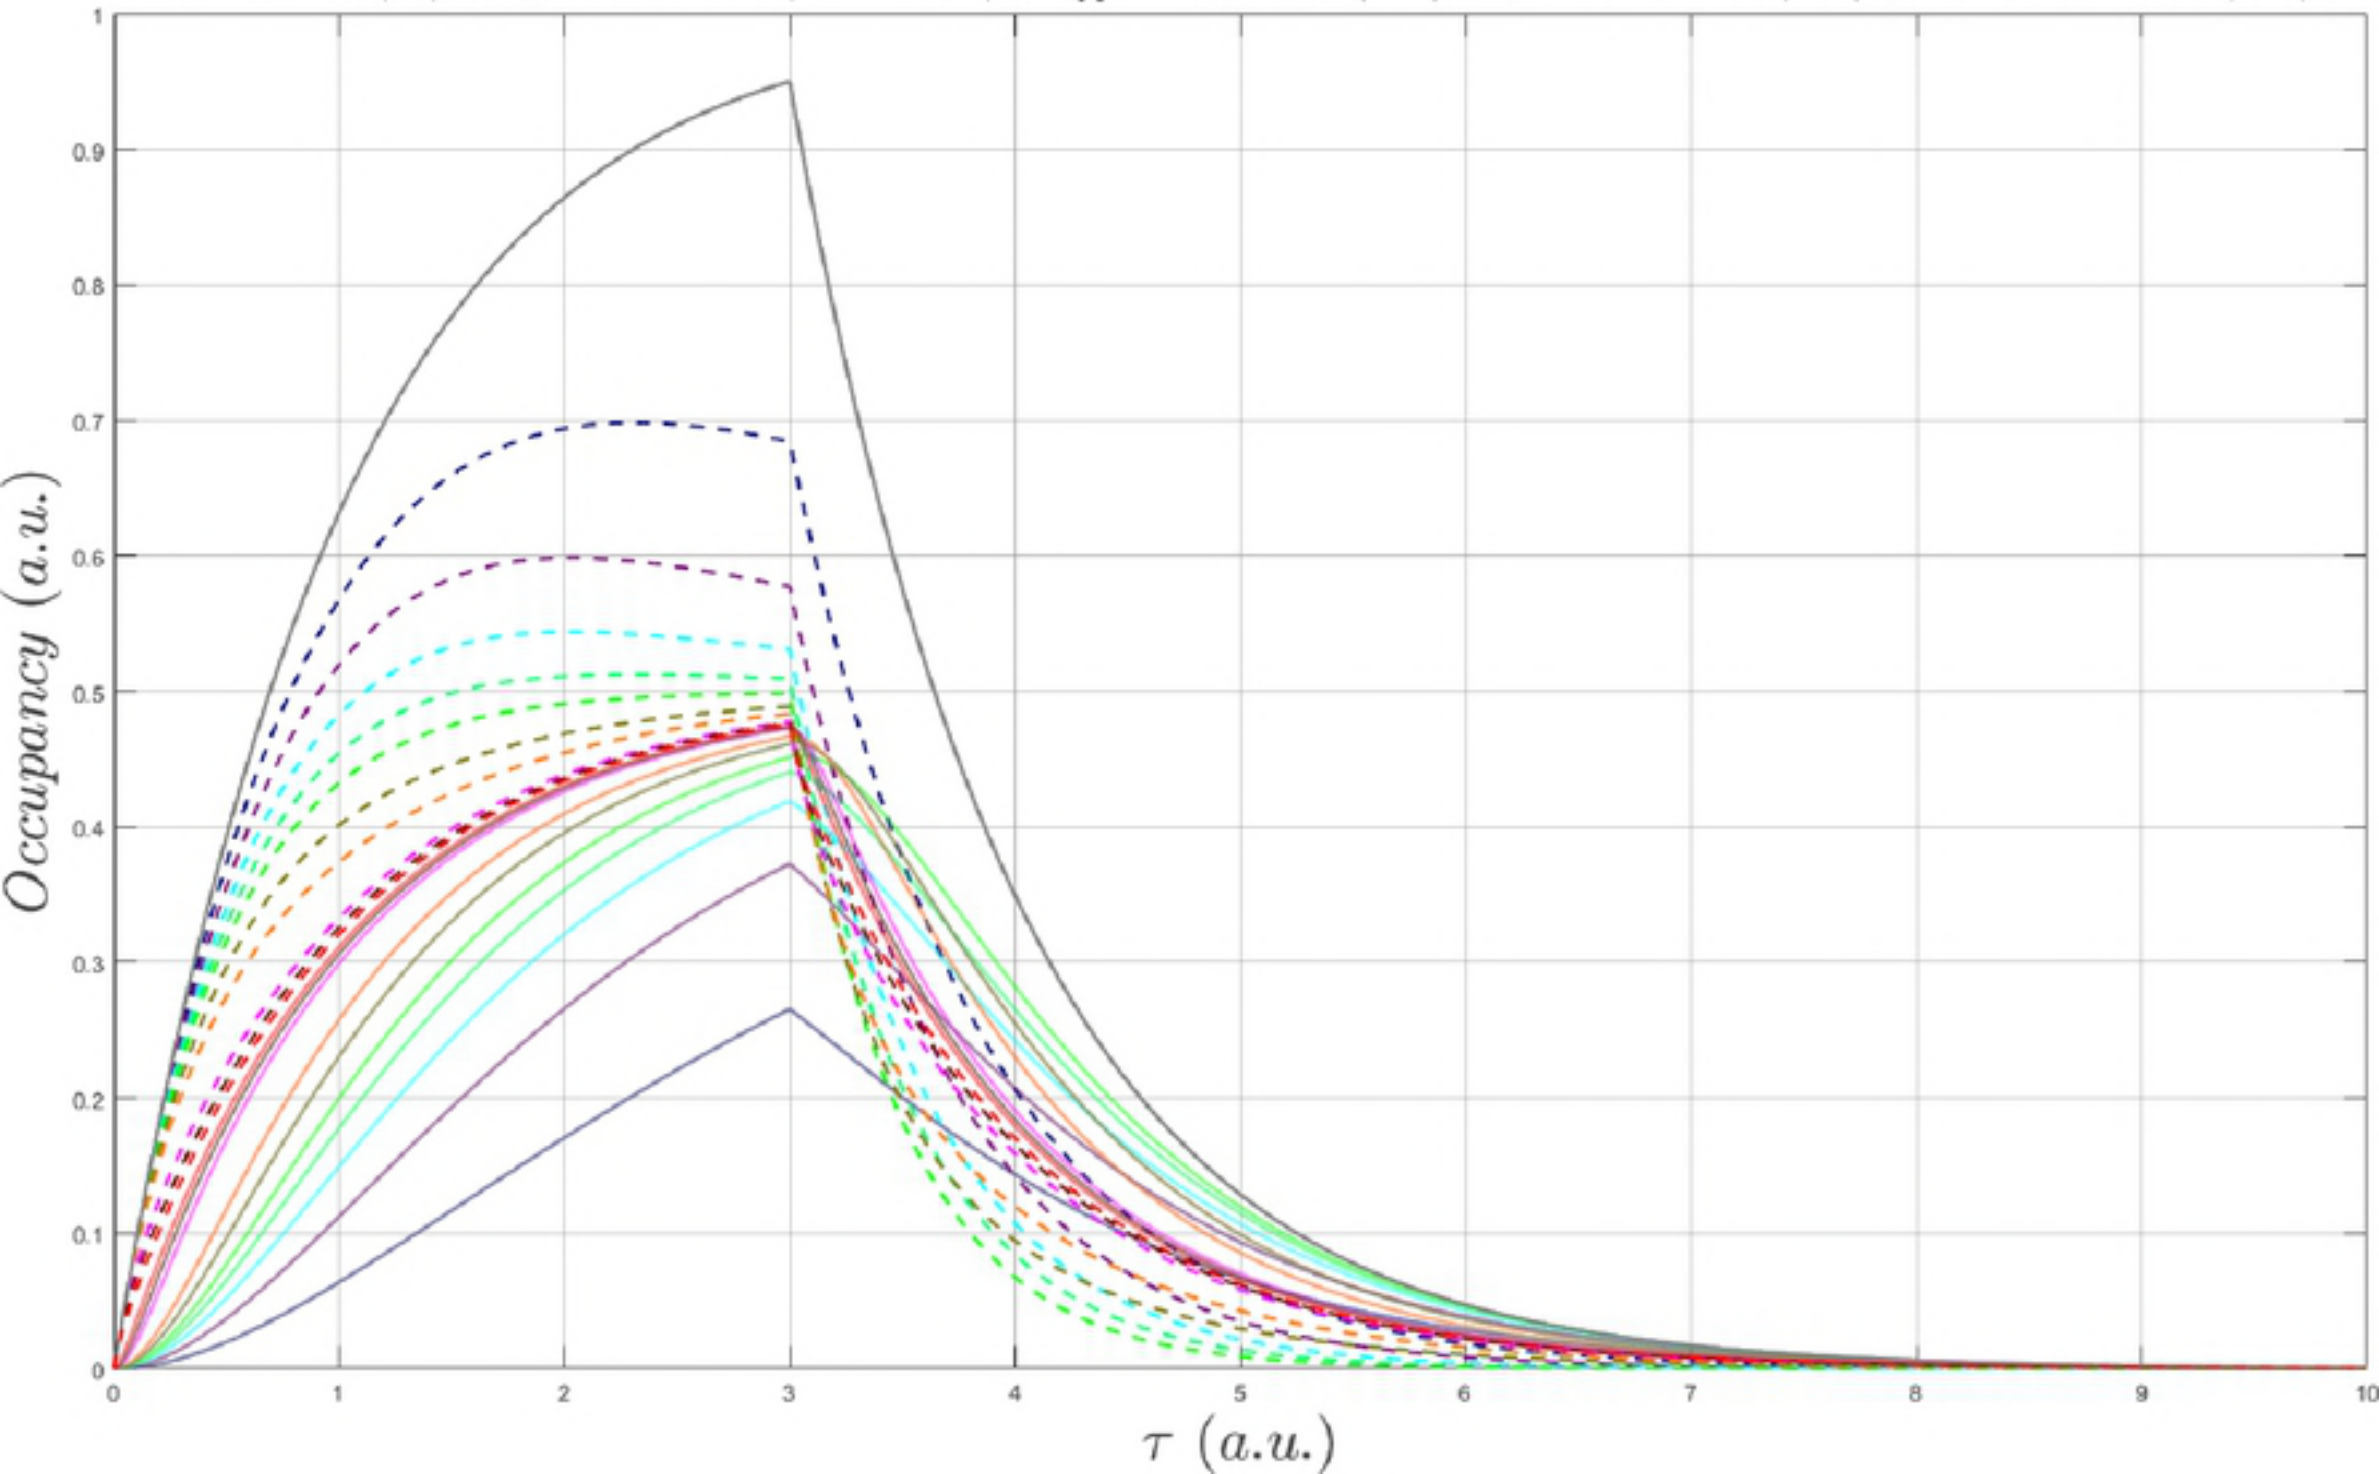



$Lo = 1e-09$  (M) ;  $k_{on} = 100000$  ( $M^{-1} \cdot s^{-1}$ ) ;  $k_{off} = 0.0001$  ( $s^{-1}$ ) ;  $k_i = 1e-05$  ( $s^{-1}$ ) ;  $k_{-i} = 1e-05$  ( $s^{-1}$ ) ;

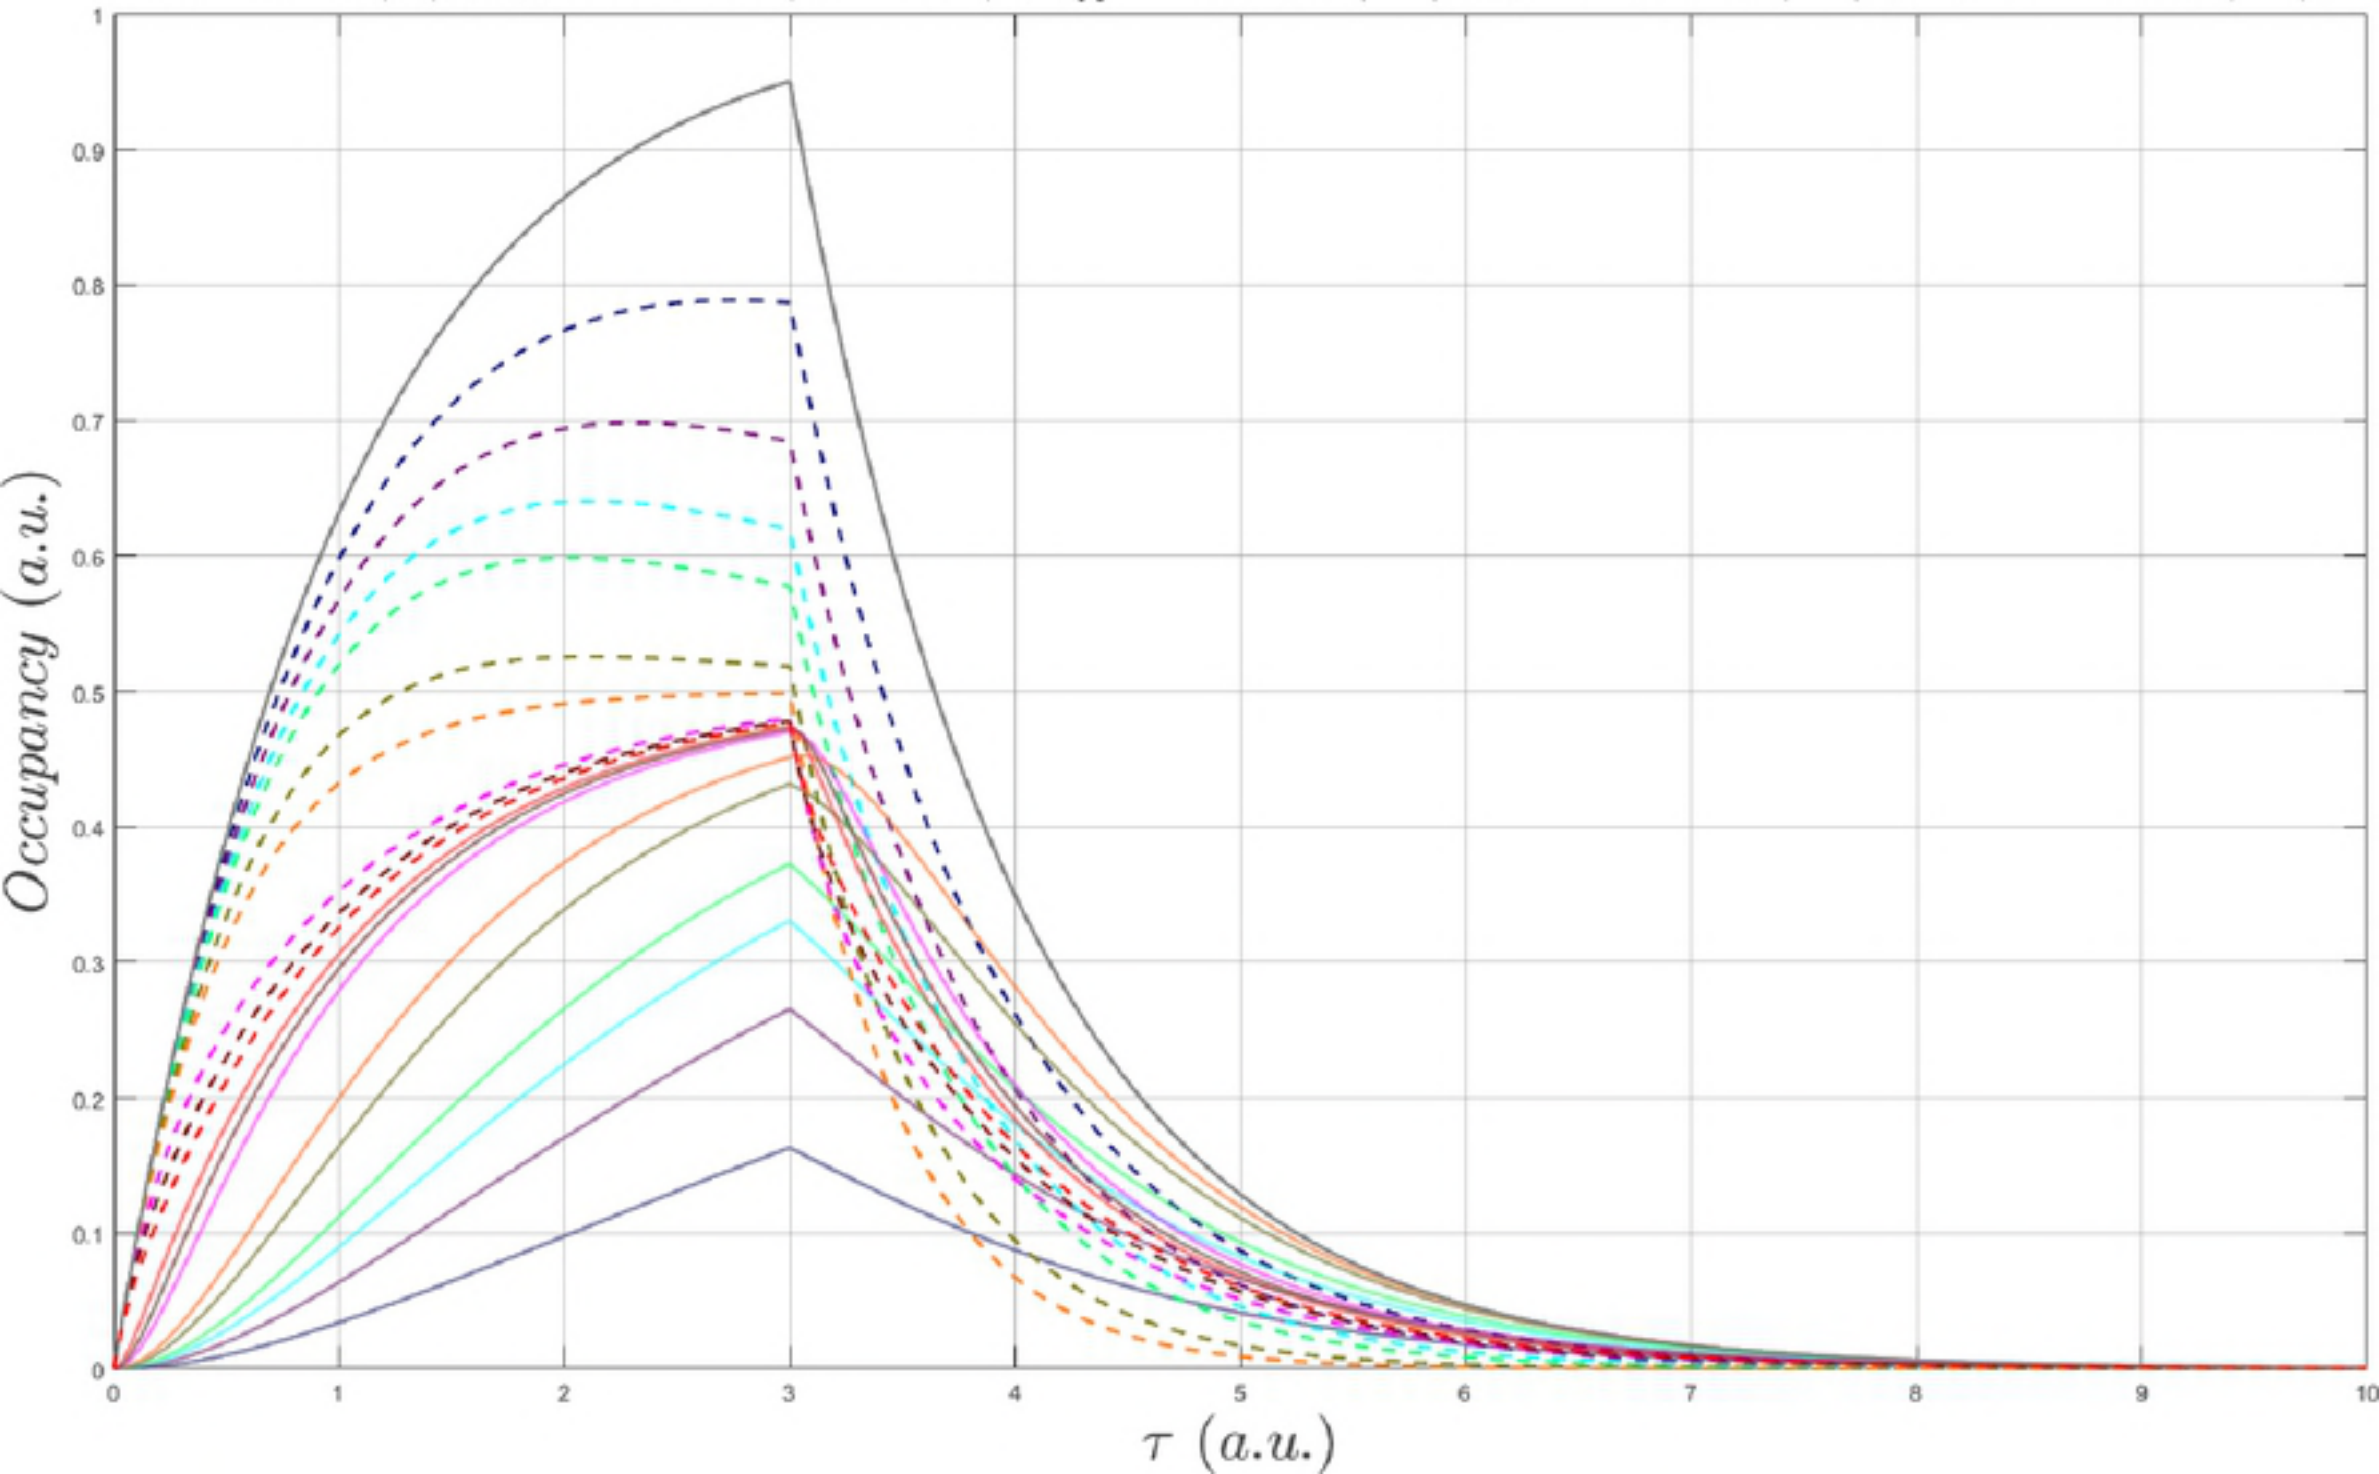

$Lo = 1e-09$  (M) ;  $k_{on} = 100000$  ( $M^{-1} \cdot s^{-1}$ ) ;  $k_{off} = 0.0001$  ( $s^{-1}$ ) ;  $k_i = 0.0001$  ( $s^{-1}$ ) ;  $k_{-i} = 0.0001$  ( $s^{-1}$ );

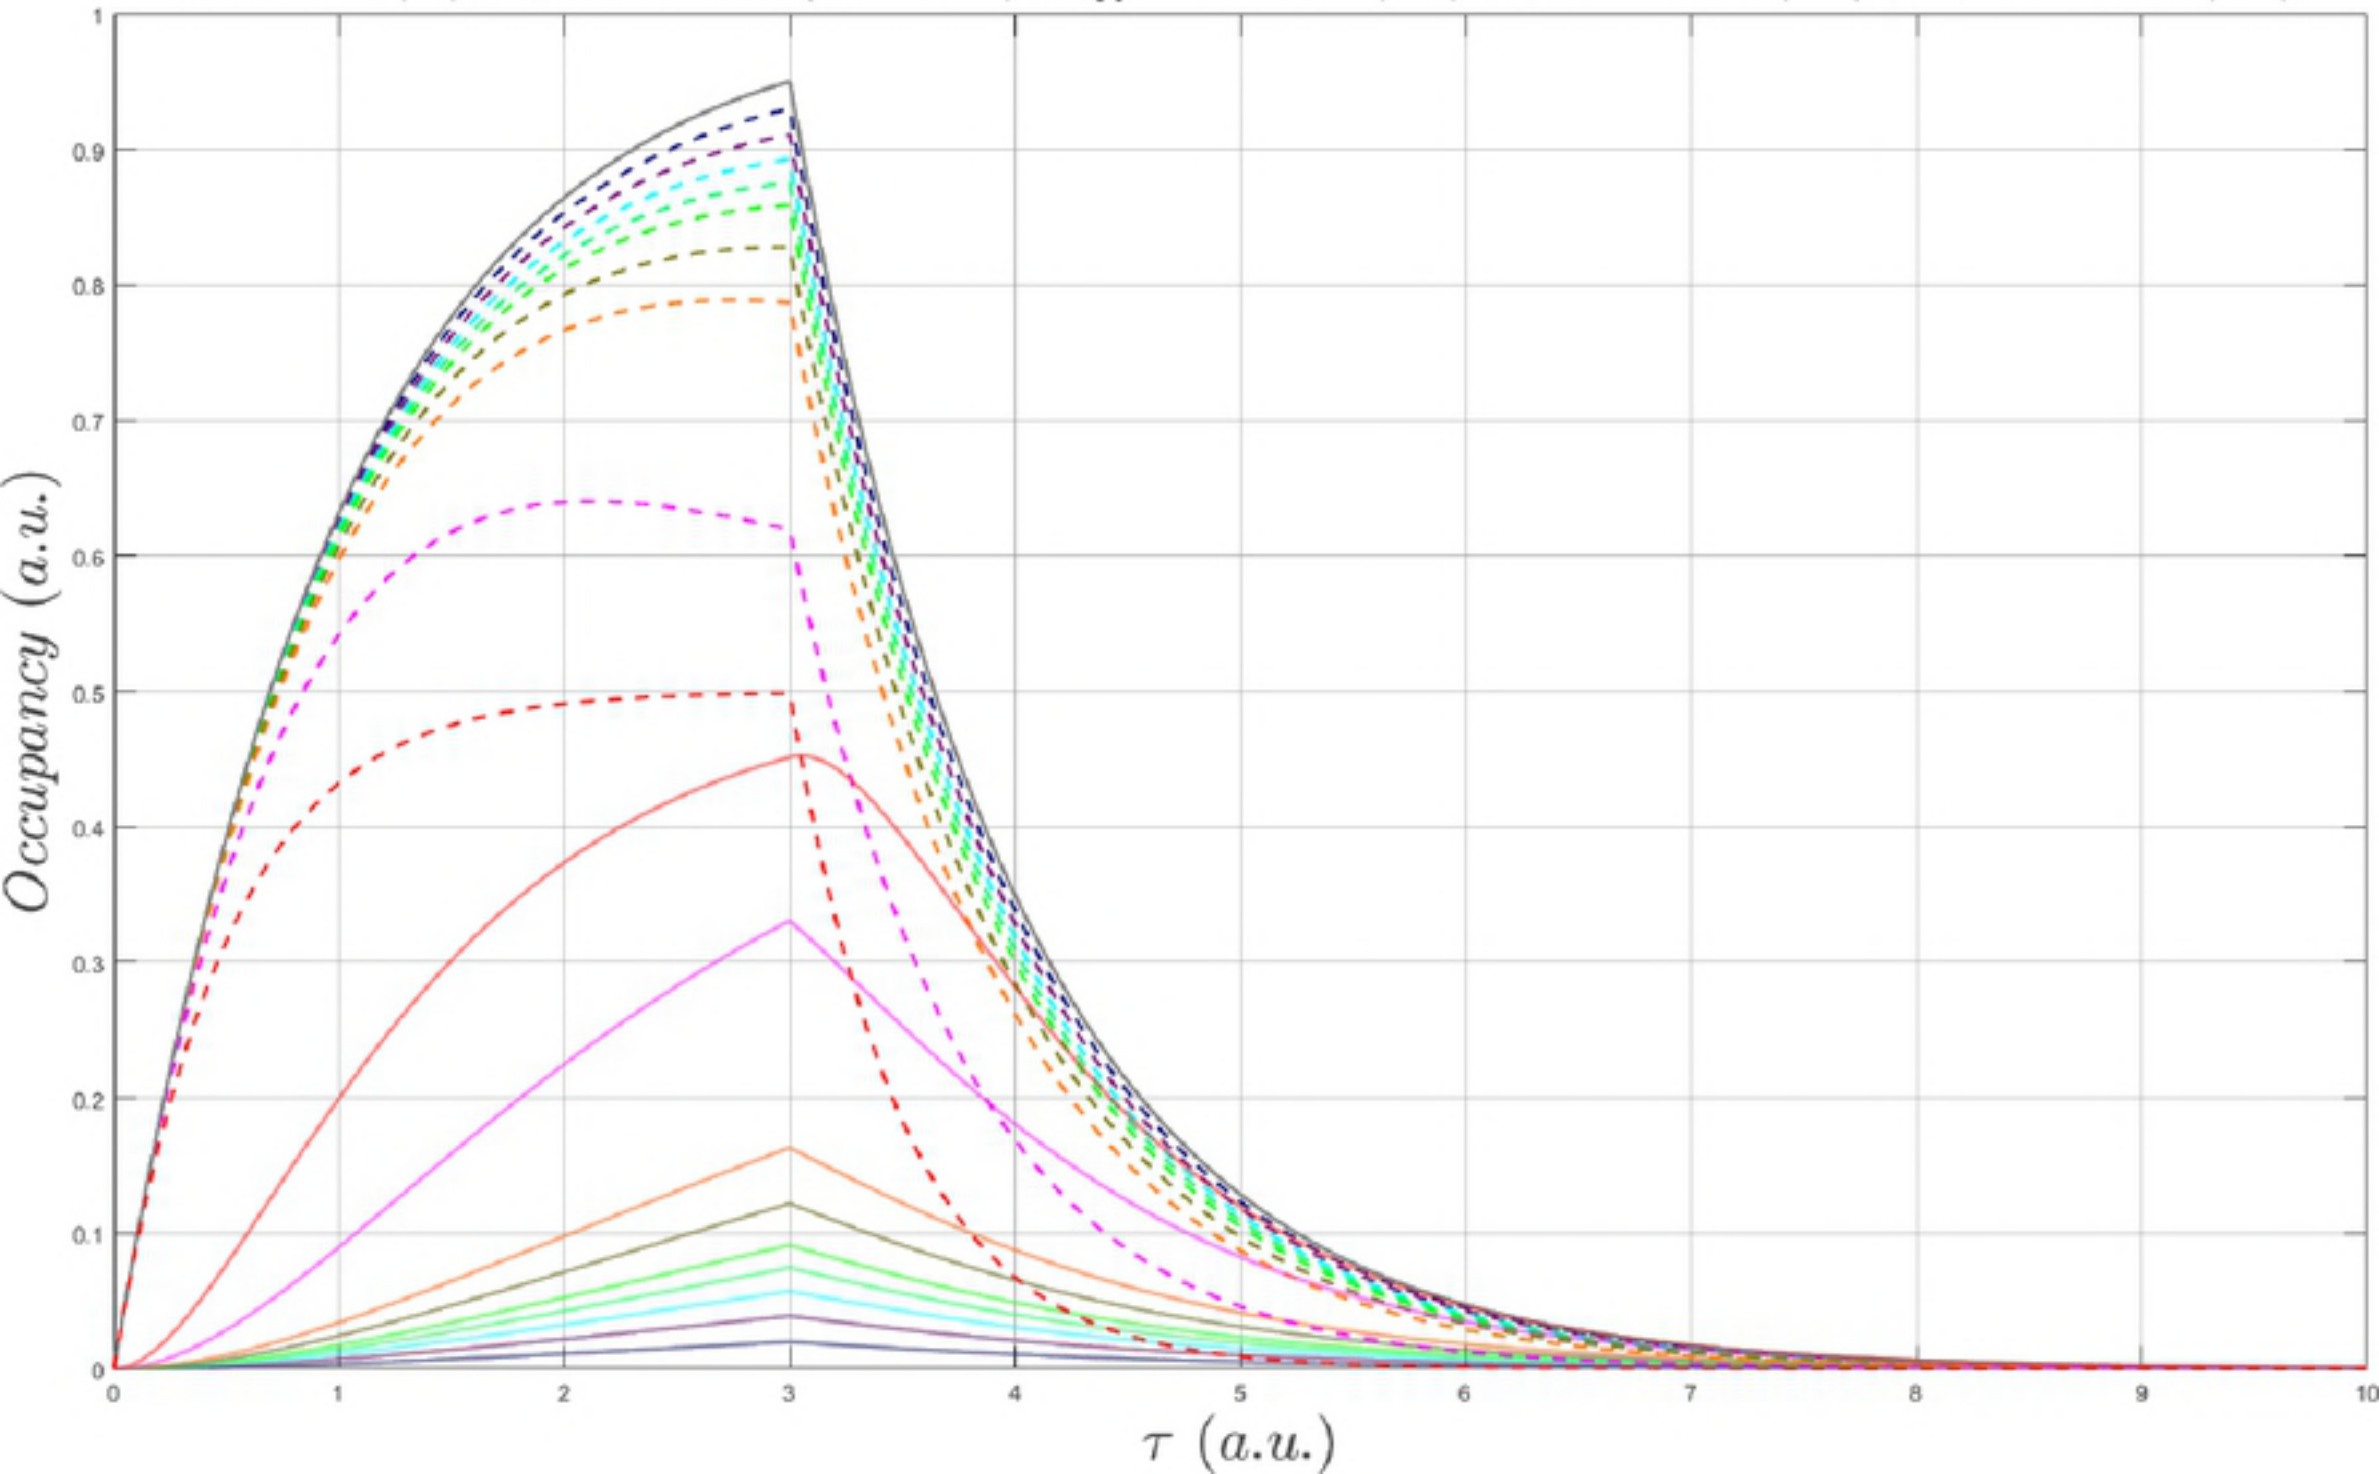

$\text{Lo} = 1\text{e-}09 \text{ (M)} ; k_{on} = 100000 \text{ (M}^{-1} \cdot \text{s}^{-1}) ; k_{off} = 0.0001 \text{ (s}^{-1}) ; k_i = 0.001 \text{ (s}^{-1}) ; k_{-i} = 0.001 \text{ (s}^{-1}) ;$

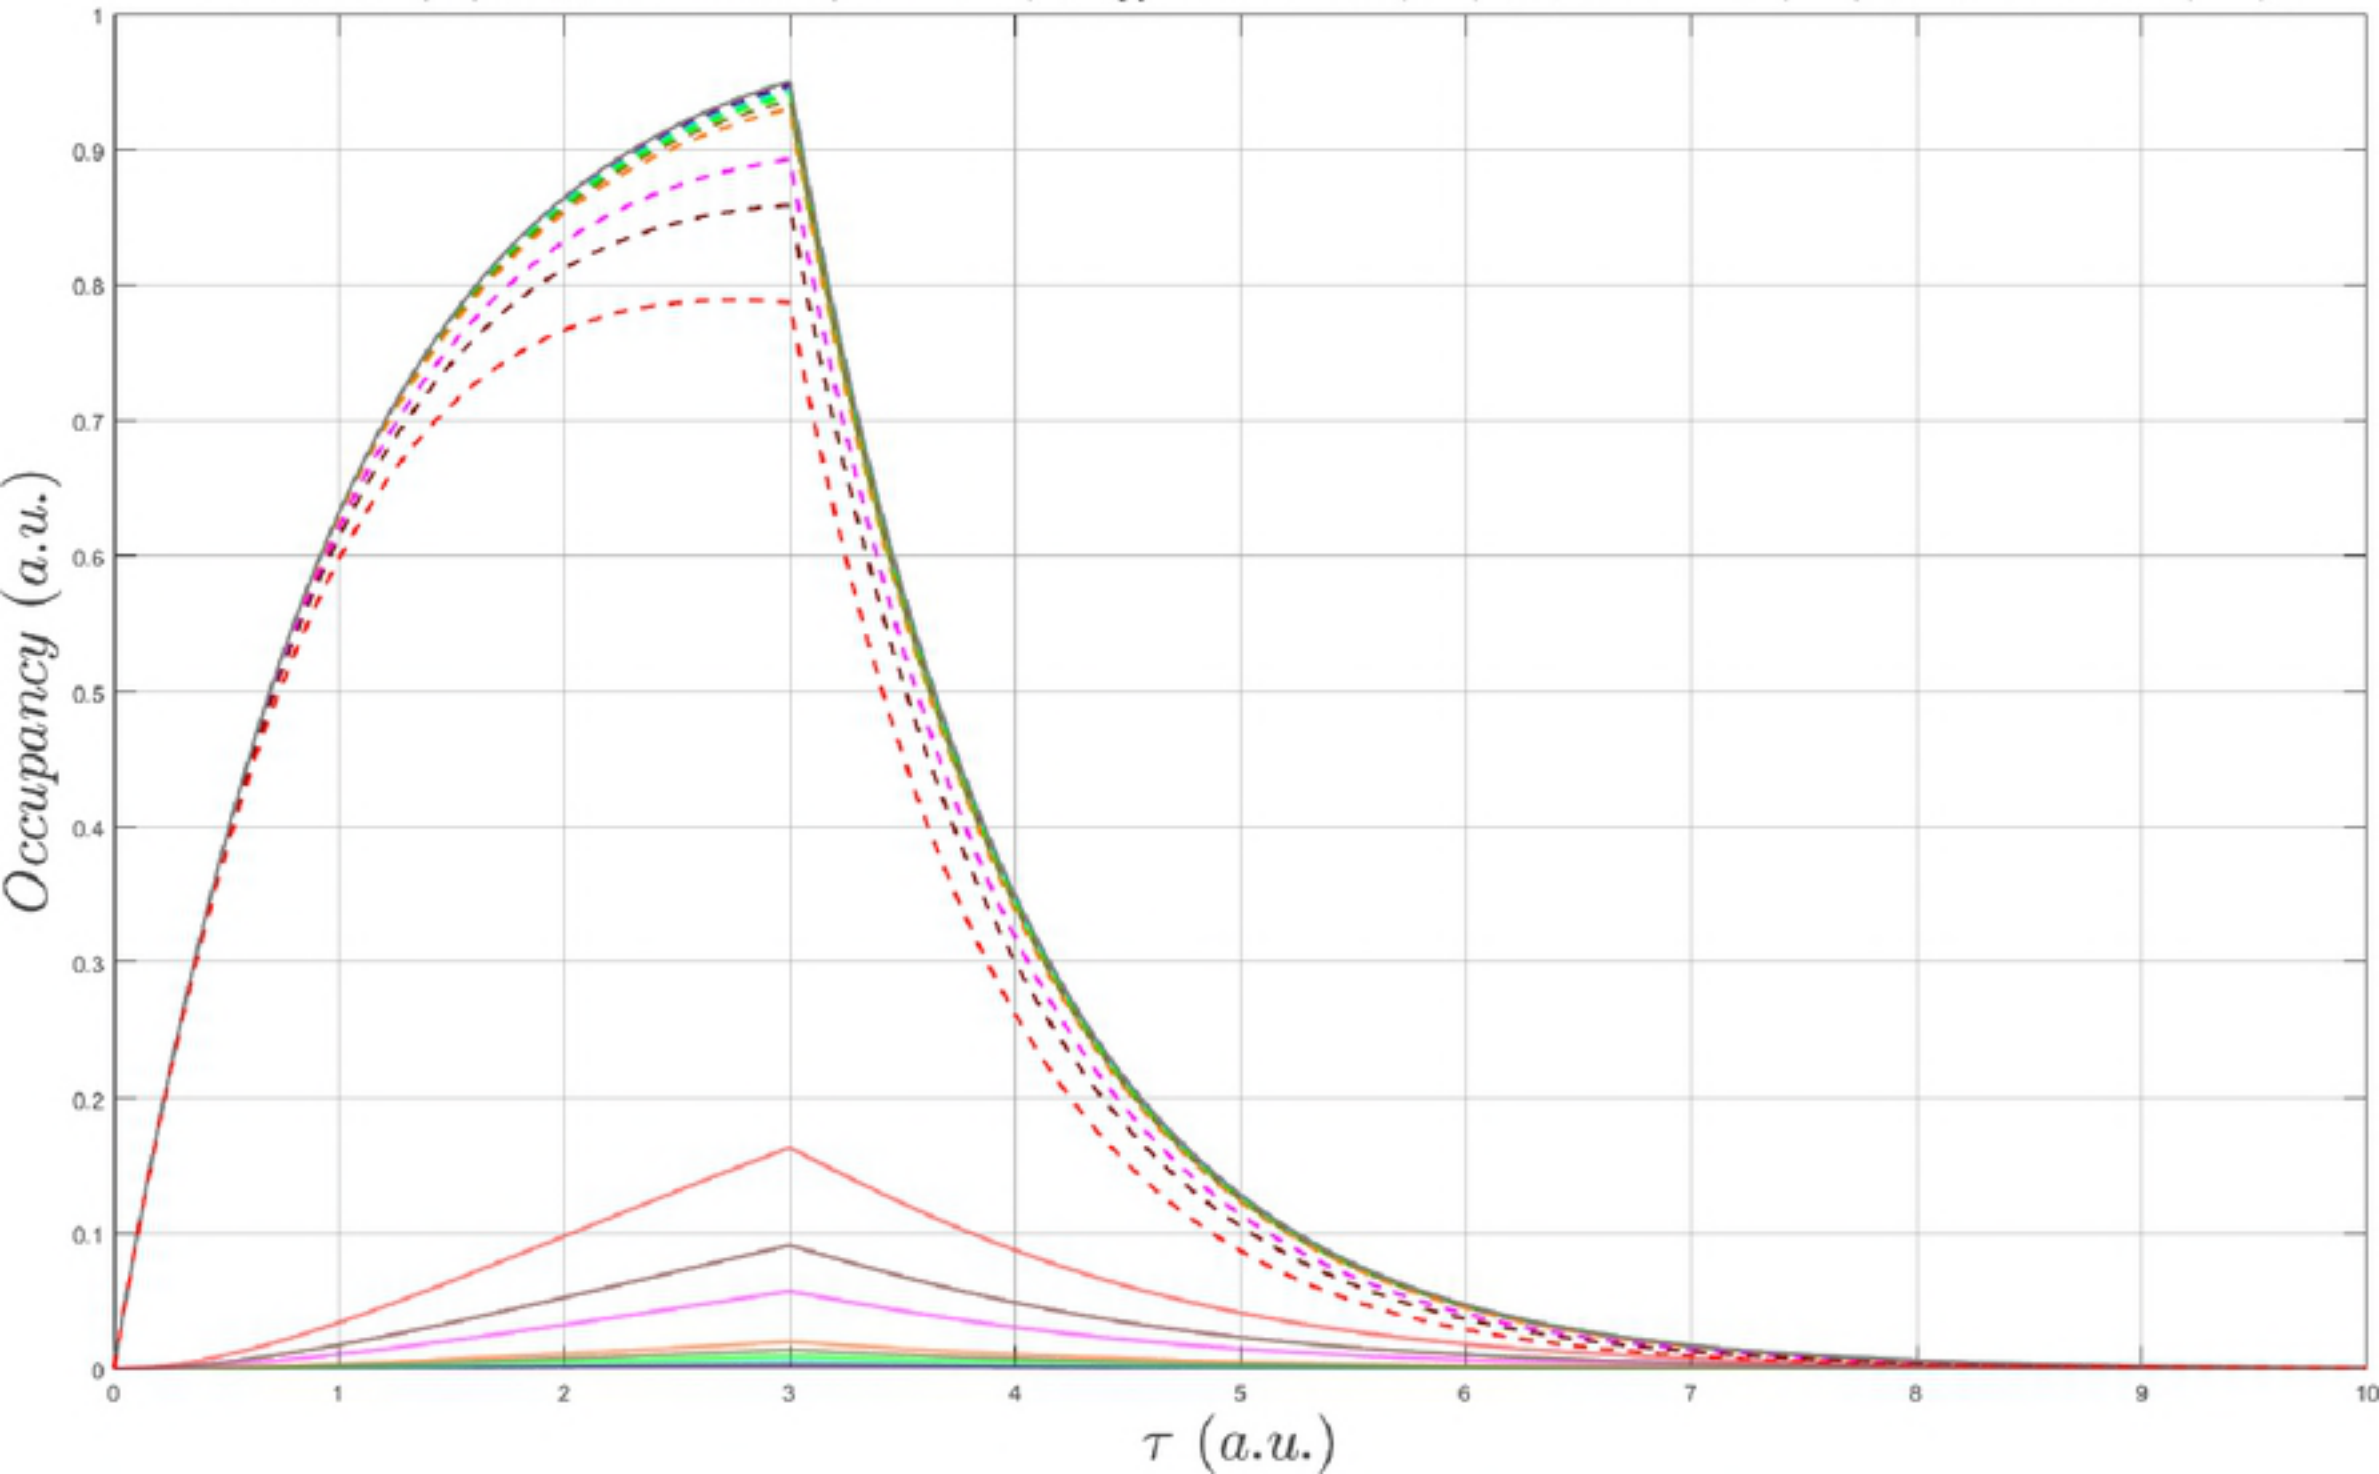



$Lo = 1e-09$  (M) ;  $k_{on} = 100000$  ( $M^{-1} \cdot s^{-1}$ ) ;  $k_{off} = 0.0001$  ( $s^{-1}$ ) ;  $k_i = 0.01$  ( $s^{-1}$ ) ;  $k_{-i} = 0.01$  ( $s^{-1}$ );

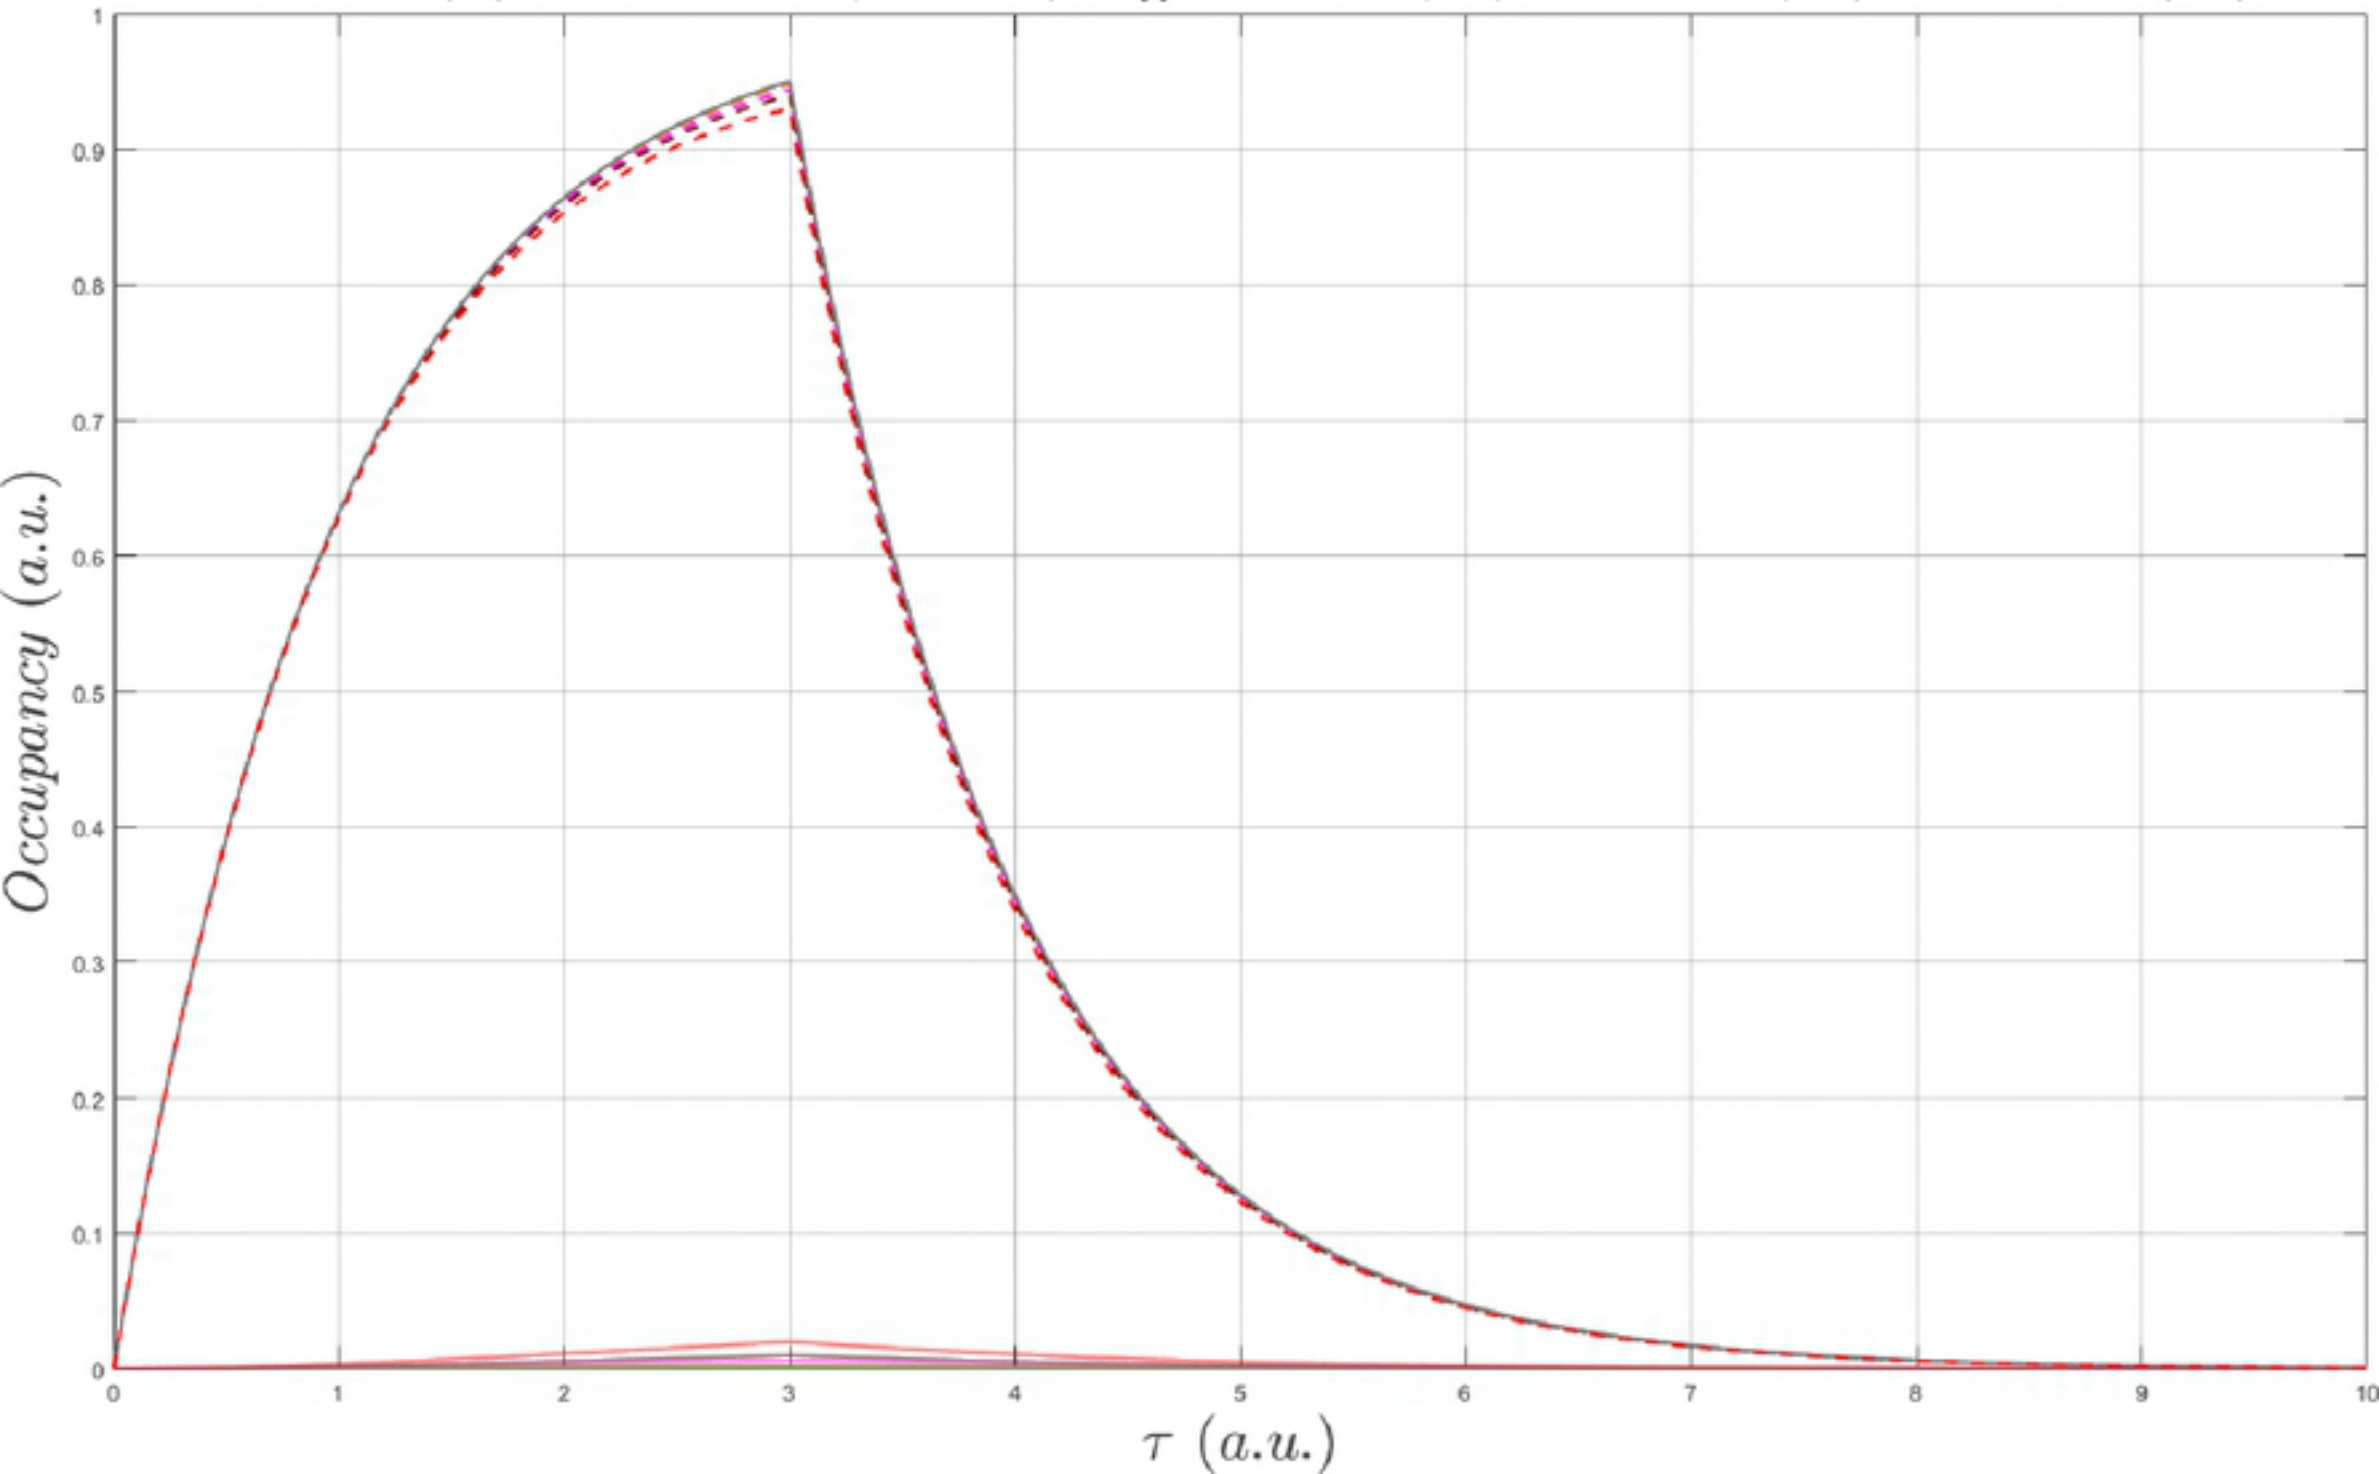

$L_0 = 1e-09$  (M) ;  $k_{on} = 10000000$  ( $M^{-1} \cdot s^{-1}$ ) ;  $k_{off} = 0.01$  ( $s^{-1}$ ) ;  $k_i = 0.0001$  ( $s^{-1}$ ) ;  $k_{-i} = 0.0001$  ( $s^{-1}$ );

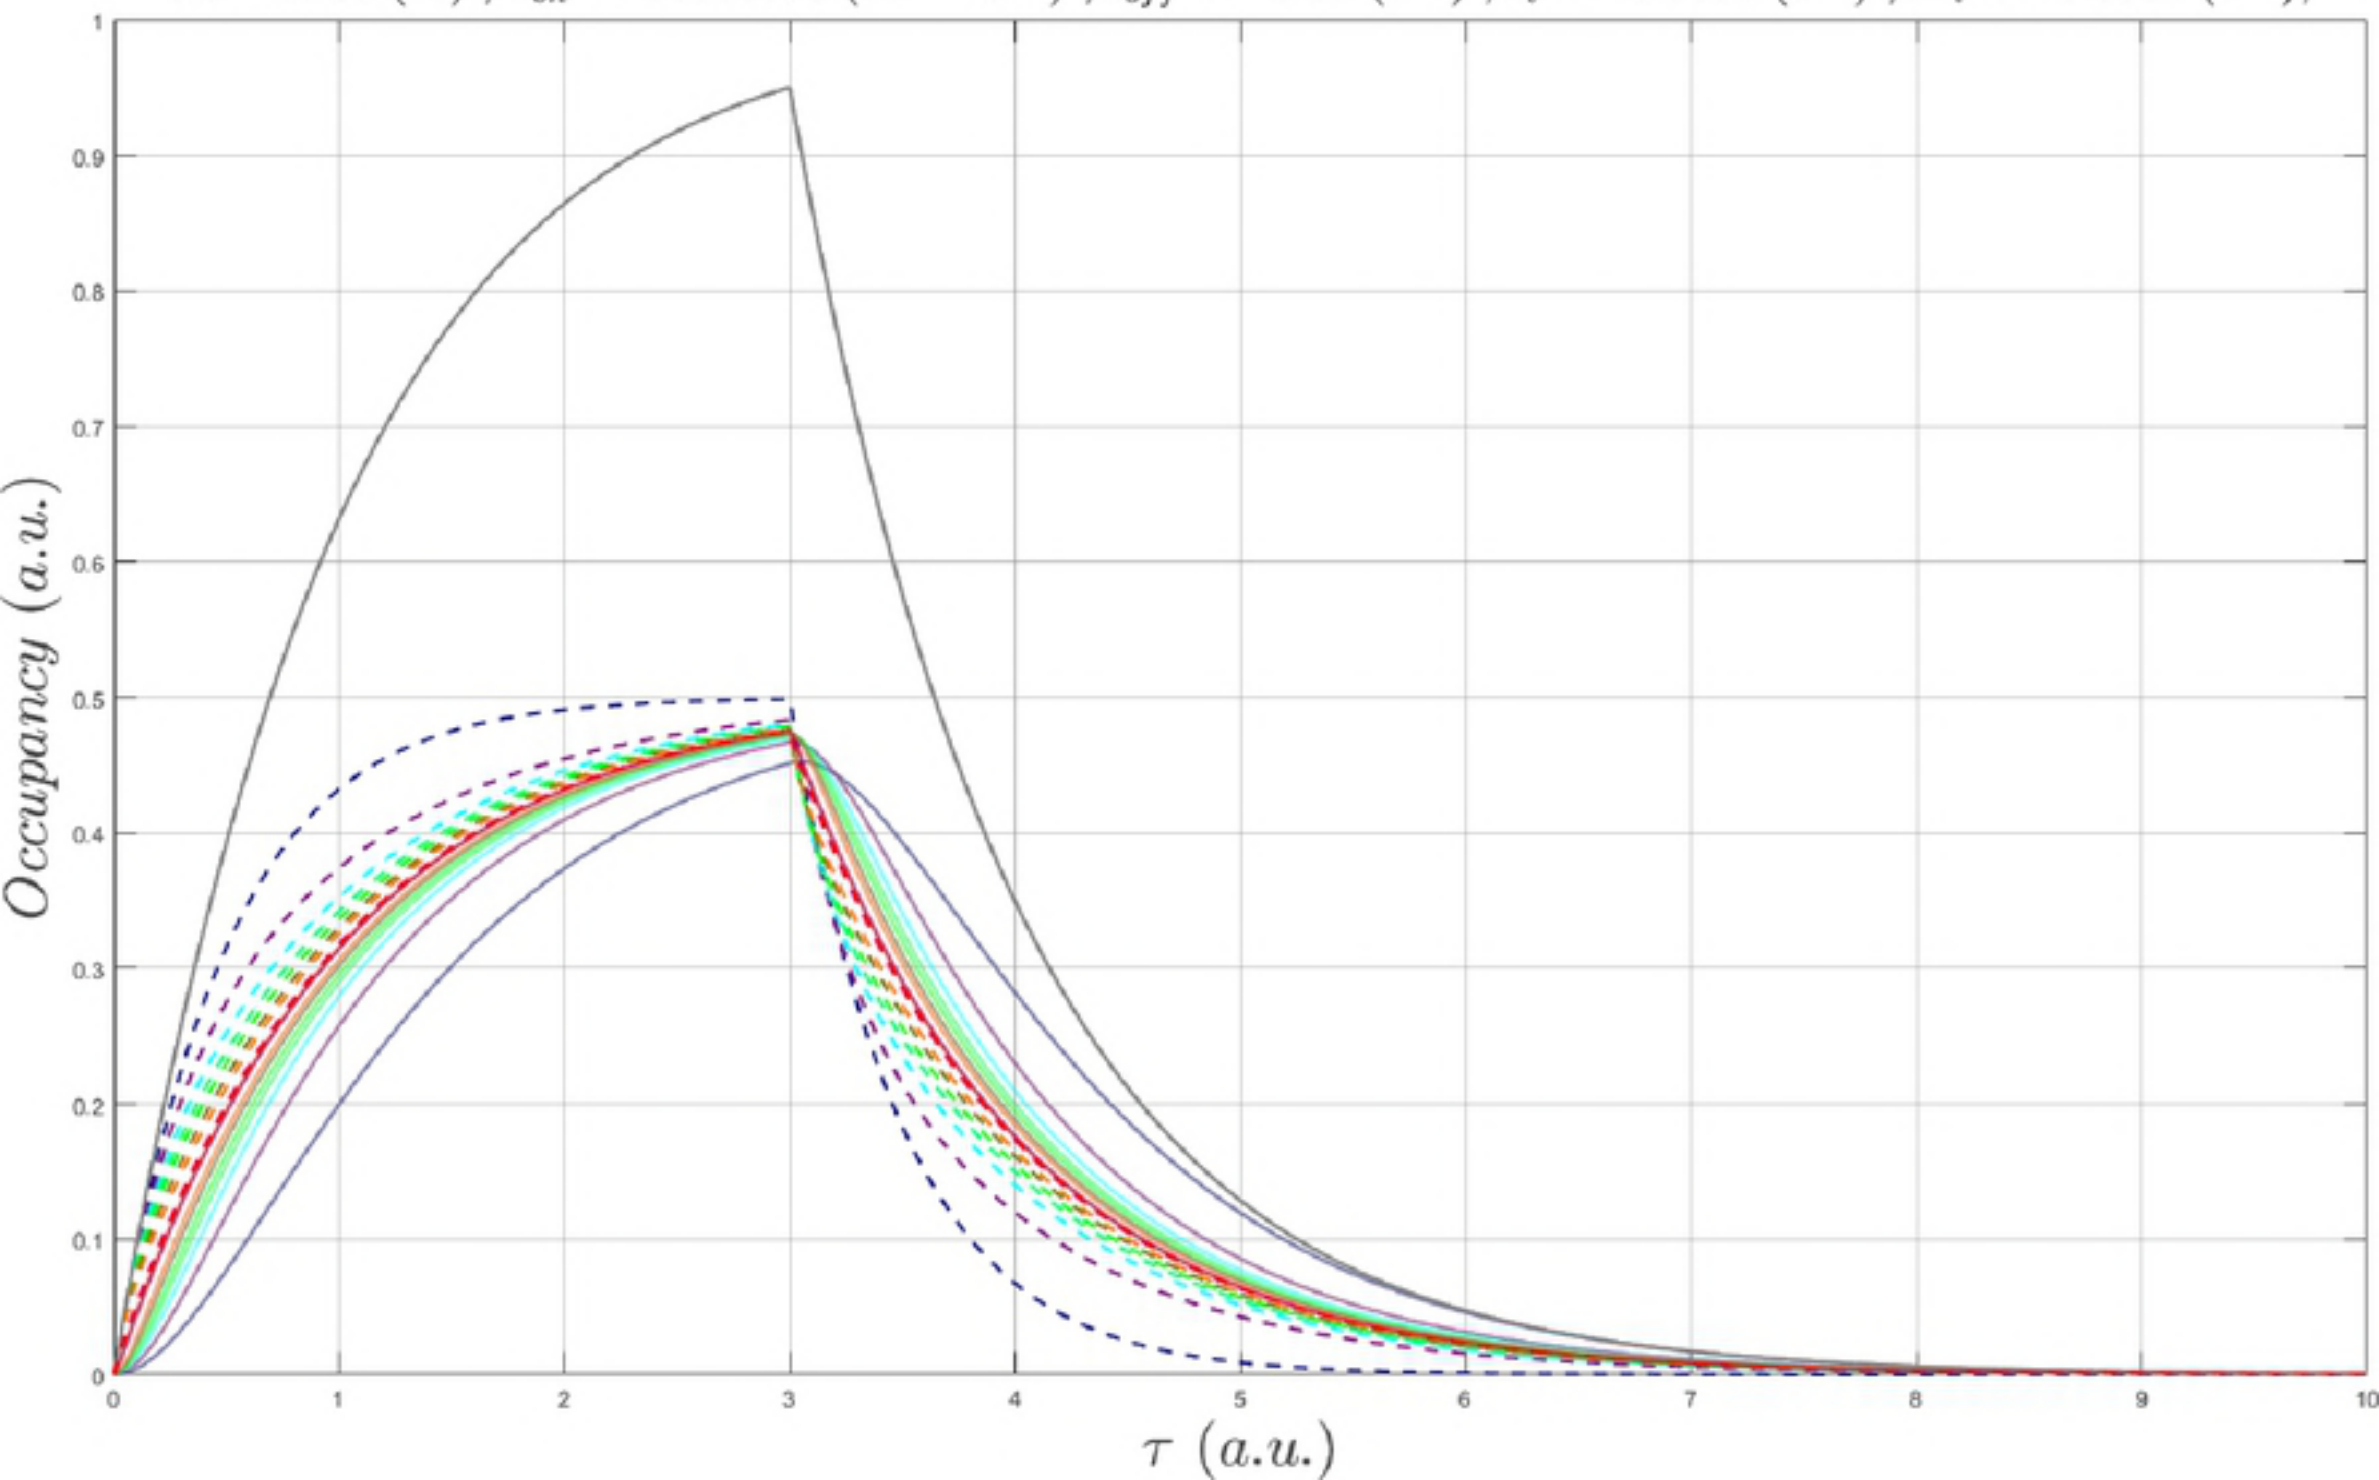

$L_0 = 1e-09$  (M) ;  $k_{on} = 10000000$  ( $M^{-1} \cdot s^{-1}$ ) ;  $k_{off} = 0.01$  ( $s^{-1}$ ) ;  $k_i = 0.001$  ( $s^{-1}$ ) ;  $k_{-i} = 0.001$  ( $s^{-1}$ ) ;

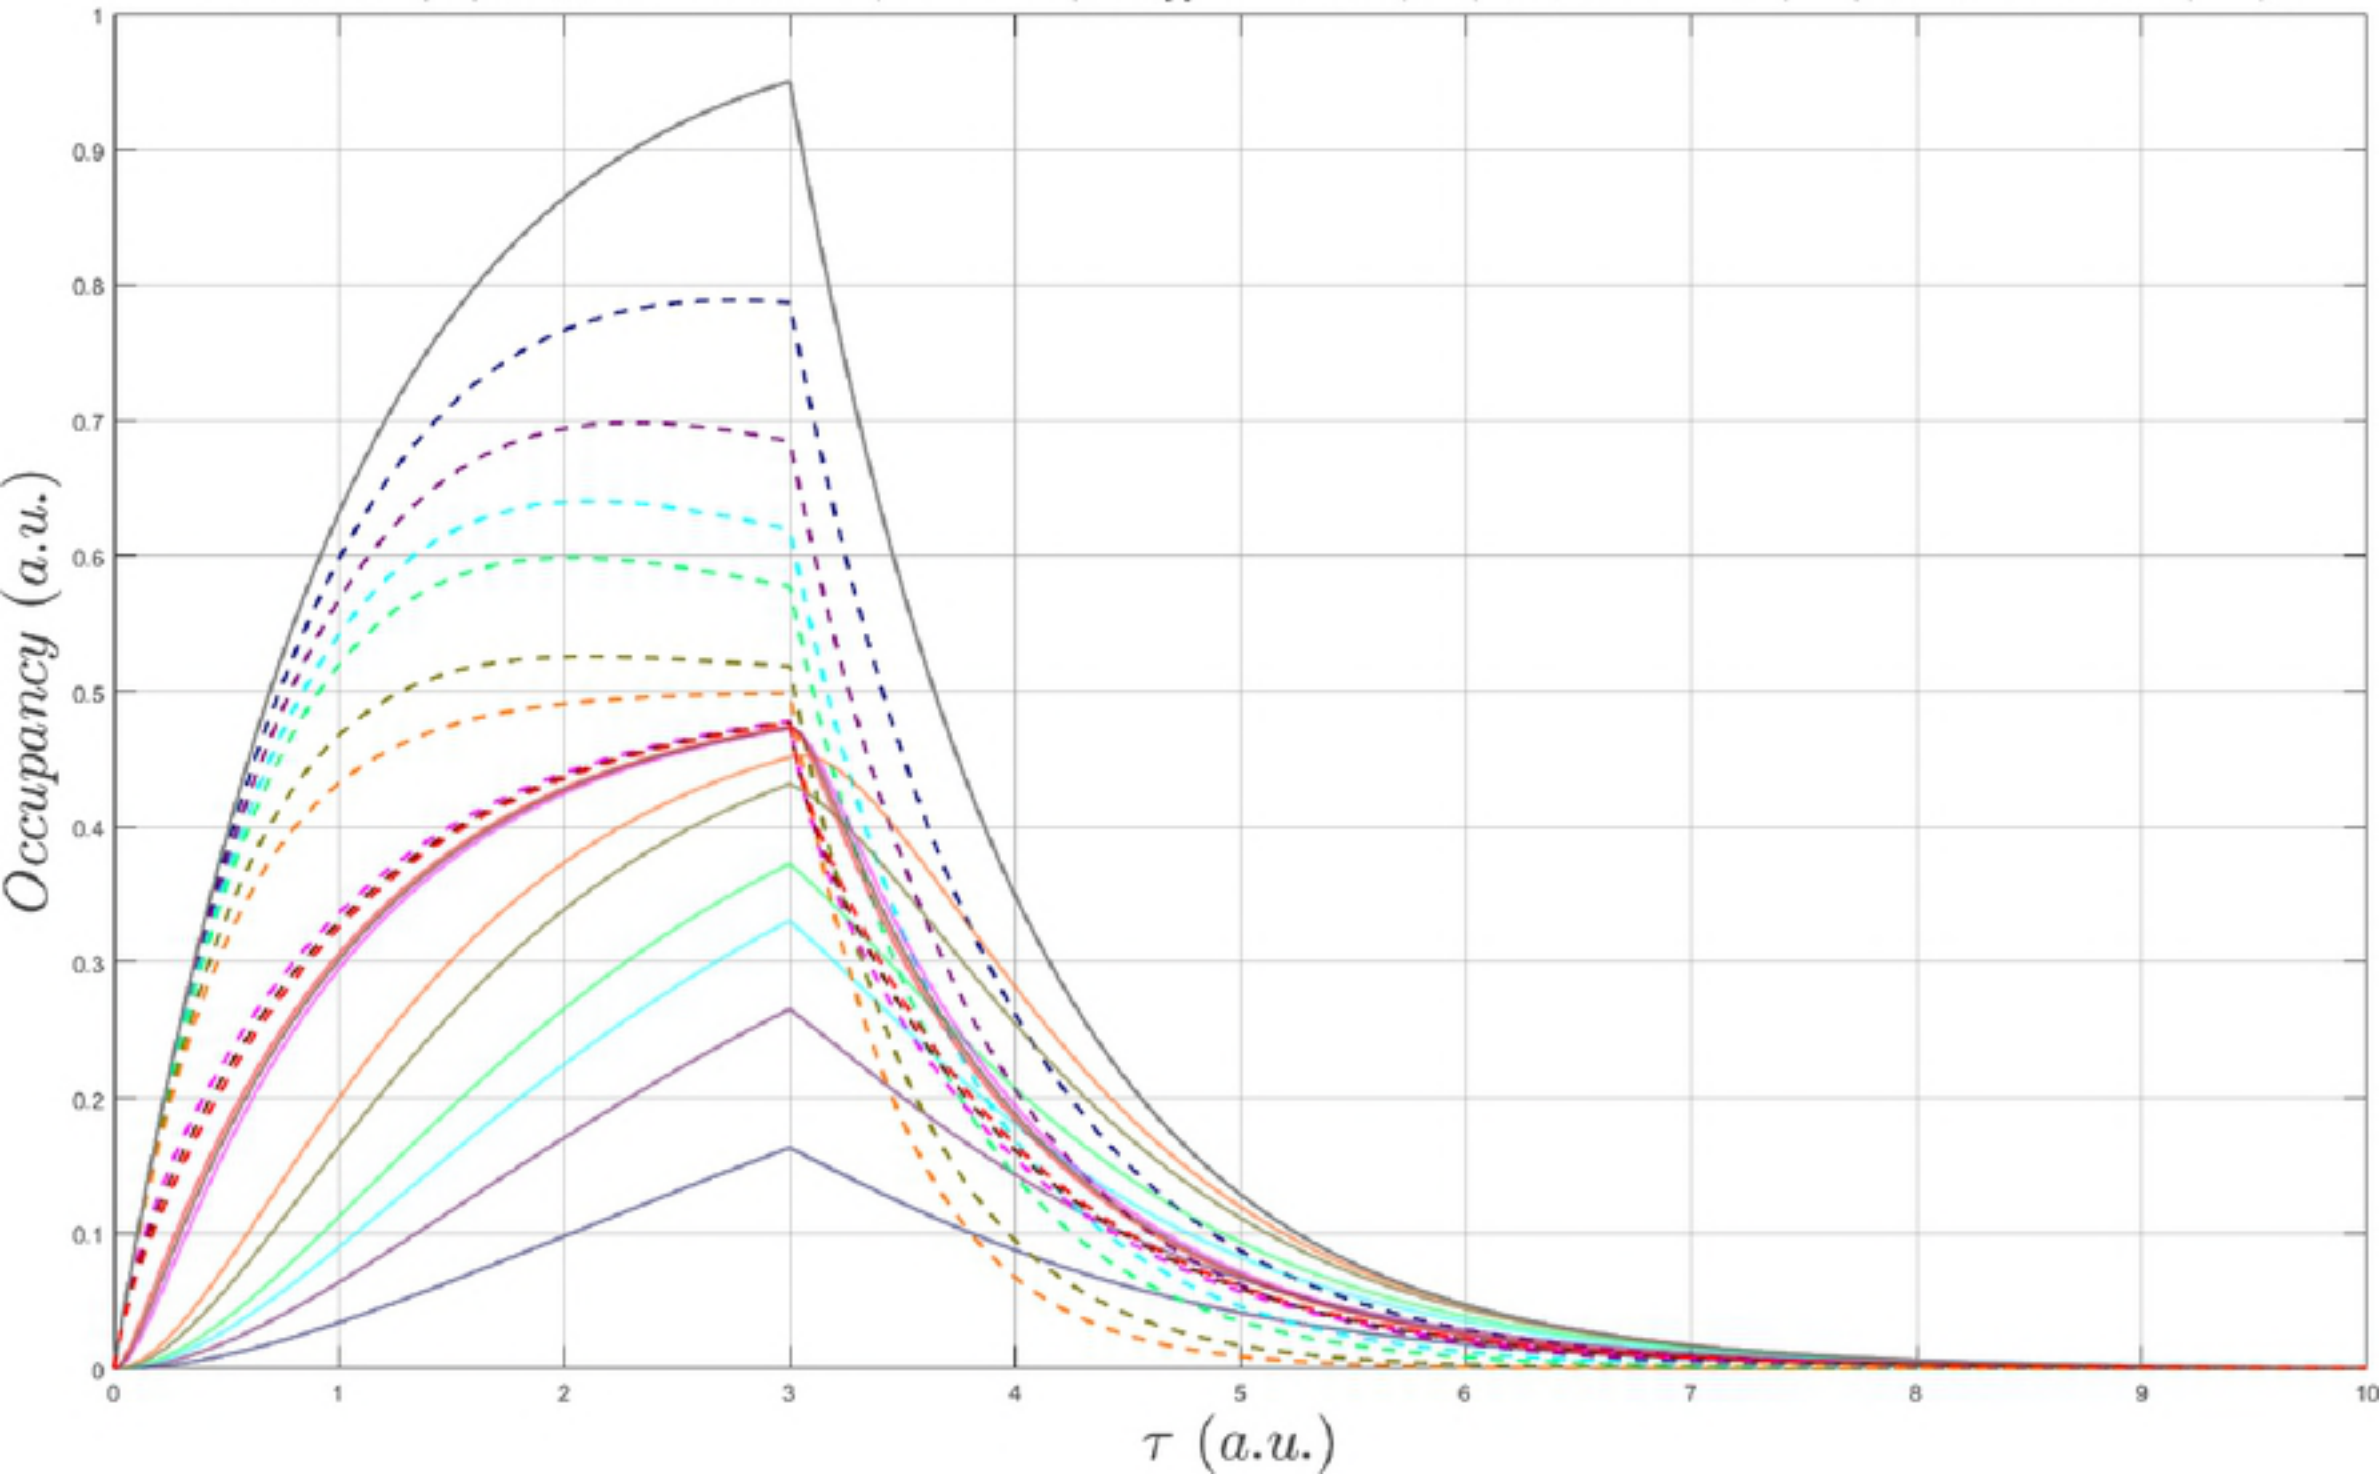

$Lo = 1e-09$  (M) ;  $k_{on} = 10000000$  ( $M^{-1} \cdot s^{-1}$ ) ;  $k_{off} = 0.01$  ( $s^{-1}$ ) ;  $k_i = 0.01$  ( $s^{-1}$ ) ;  $k_{-i} = 0.01$  ( $s^{-1}$ );

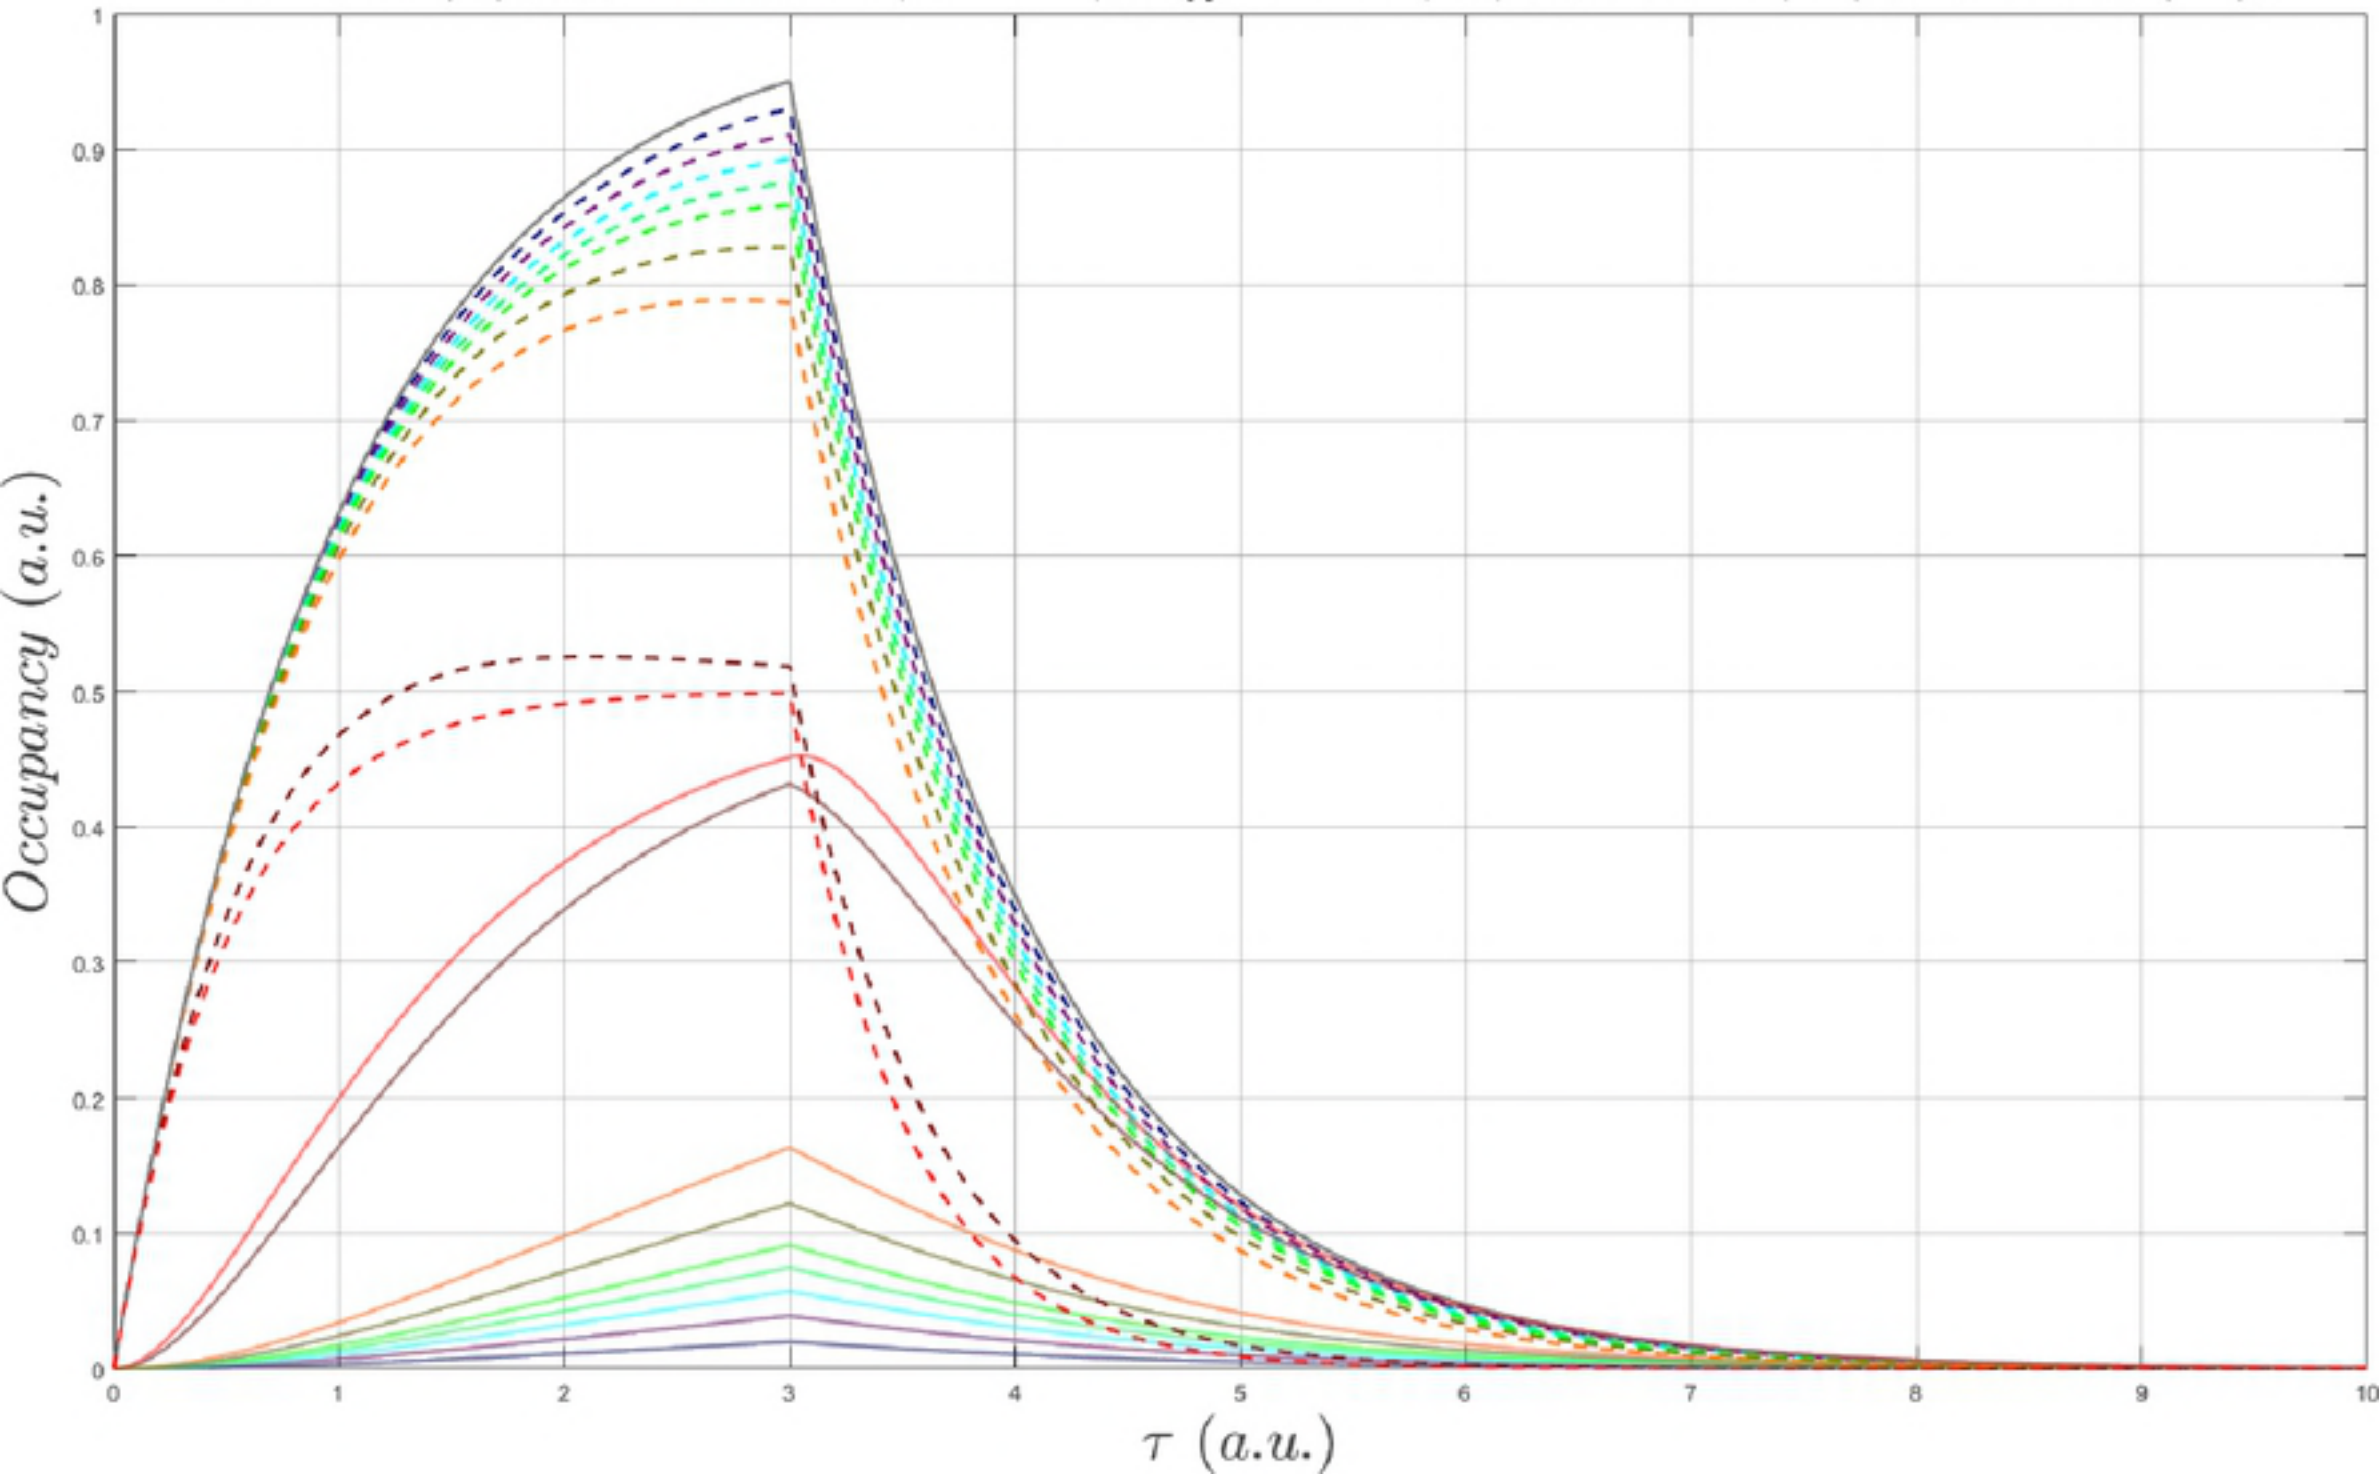





$L_0 = 1e-09$  (M) ;  $k_{on} = 10000000$  ( $M^{-1} \cdot s^{-1}$ ) ;  $k_{off} = 0.01$  ( $s^{-1}$ ) ;  $k_i = 1$  ( $s^{-1}$ ) ;  $k_{-i} = 1$  ( $s^{-1}$ );

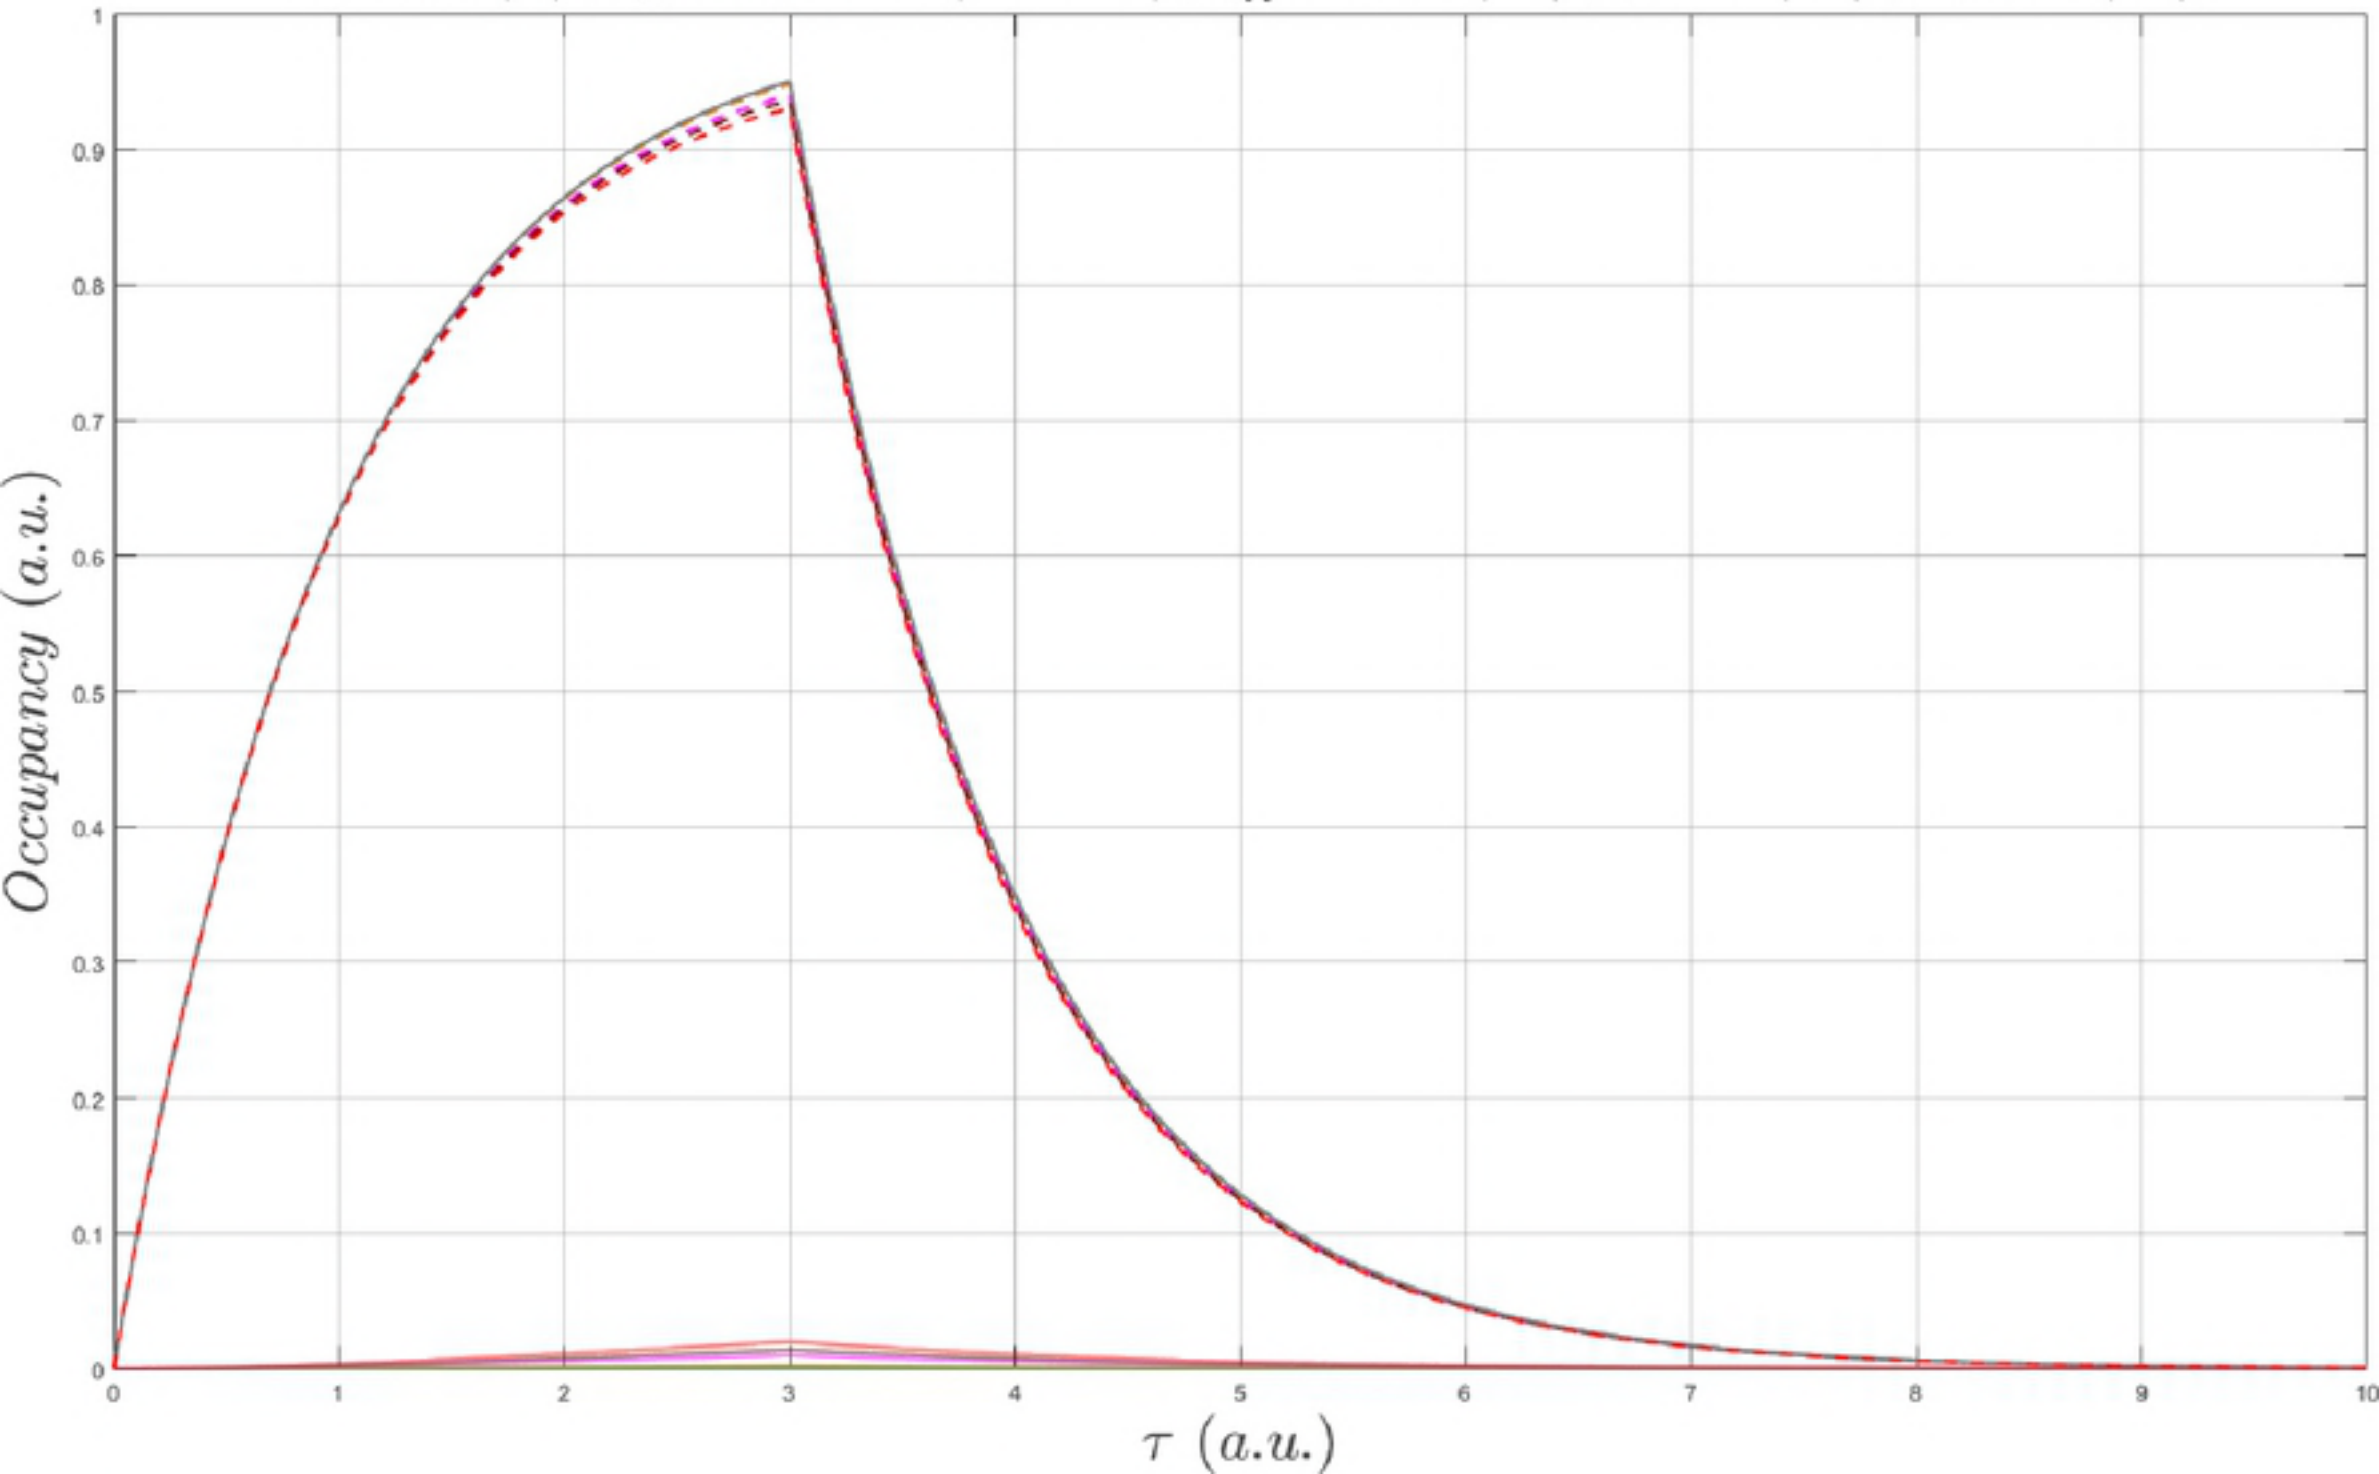

$L_0 = 1e-09$  (M) ;  $k_{on} = 10000$  ( $M^{-1} \cdot s^{-1}$ ) ;  $k_{off} = 1e-05$  ( $s^{-1}$ ) ;  $k_i = 0.0001$  ( $s^{-1}$ ) ;  $k_{-i} = 1e-06$  ( $s^{-1}$ ) ;

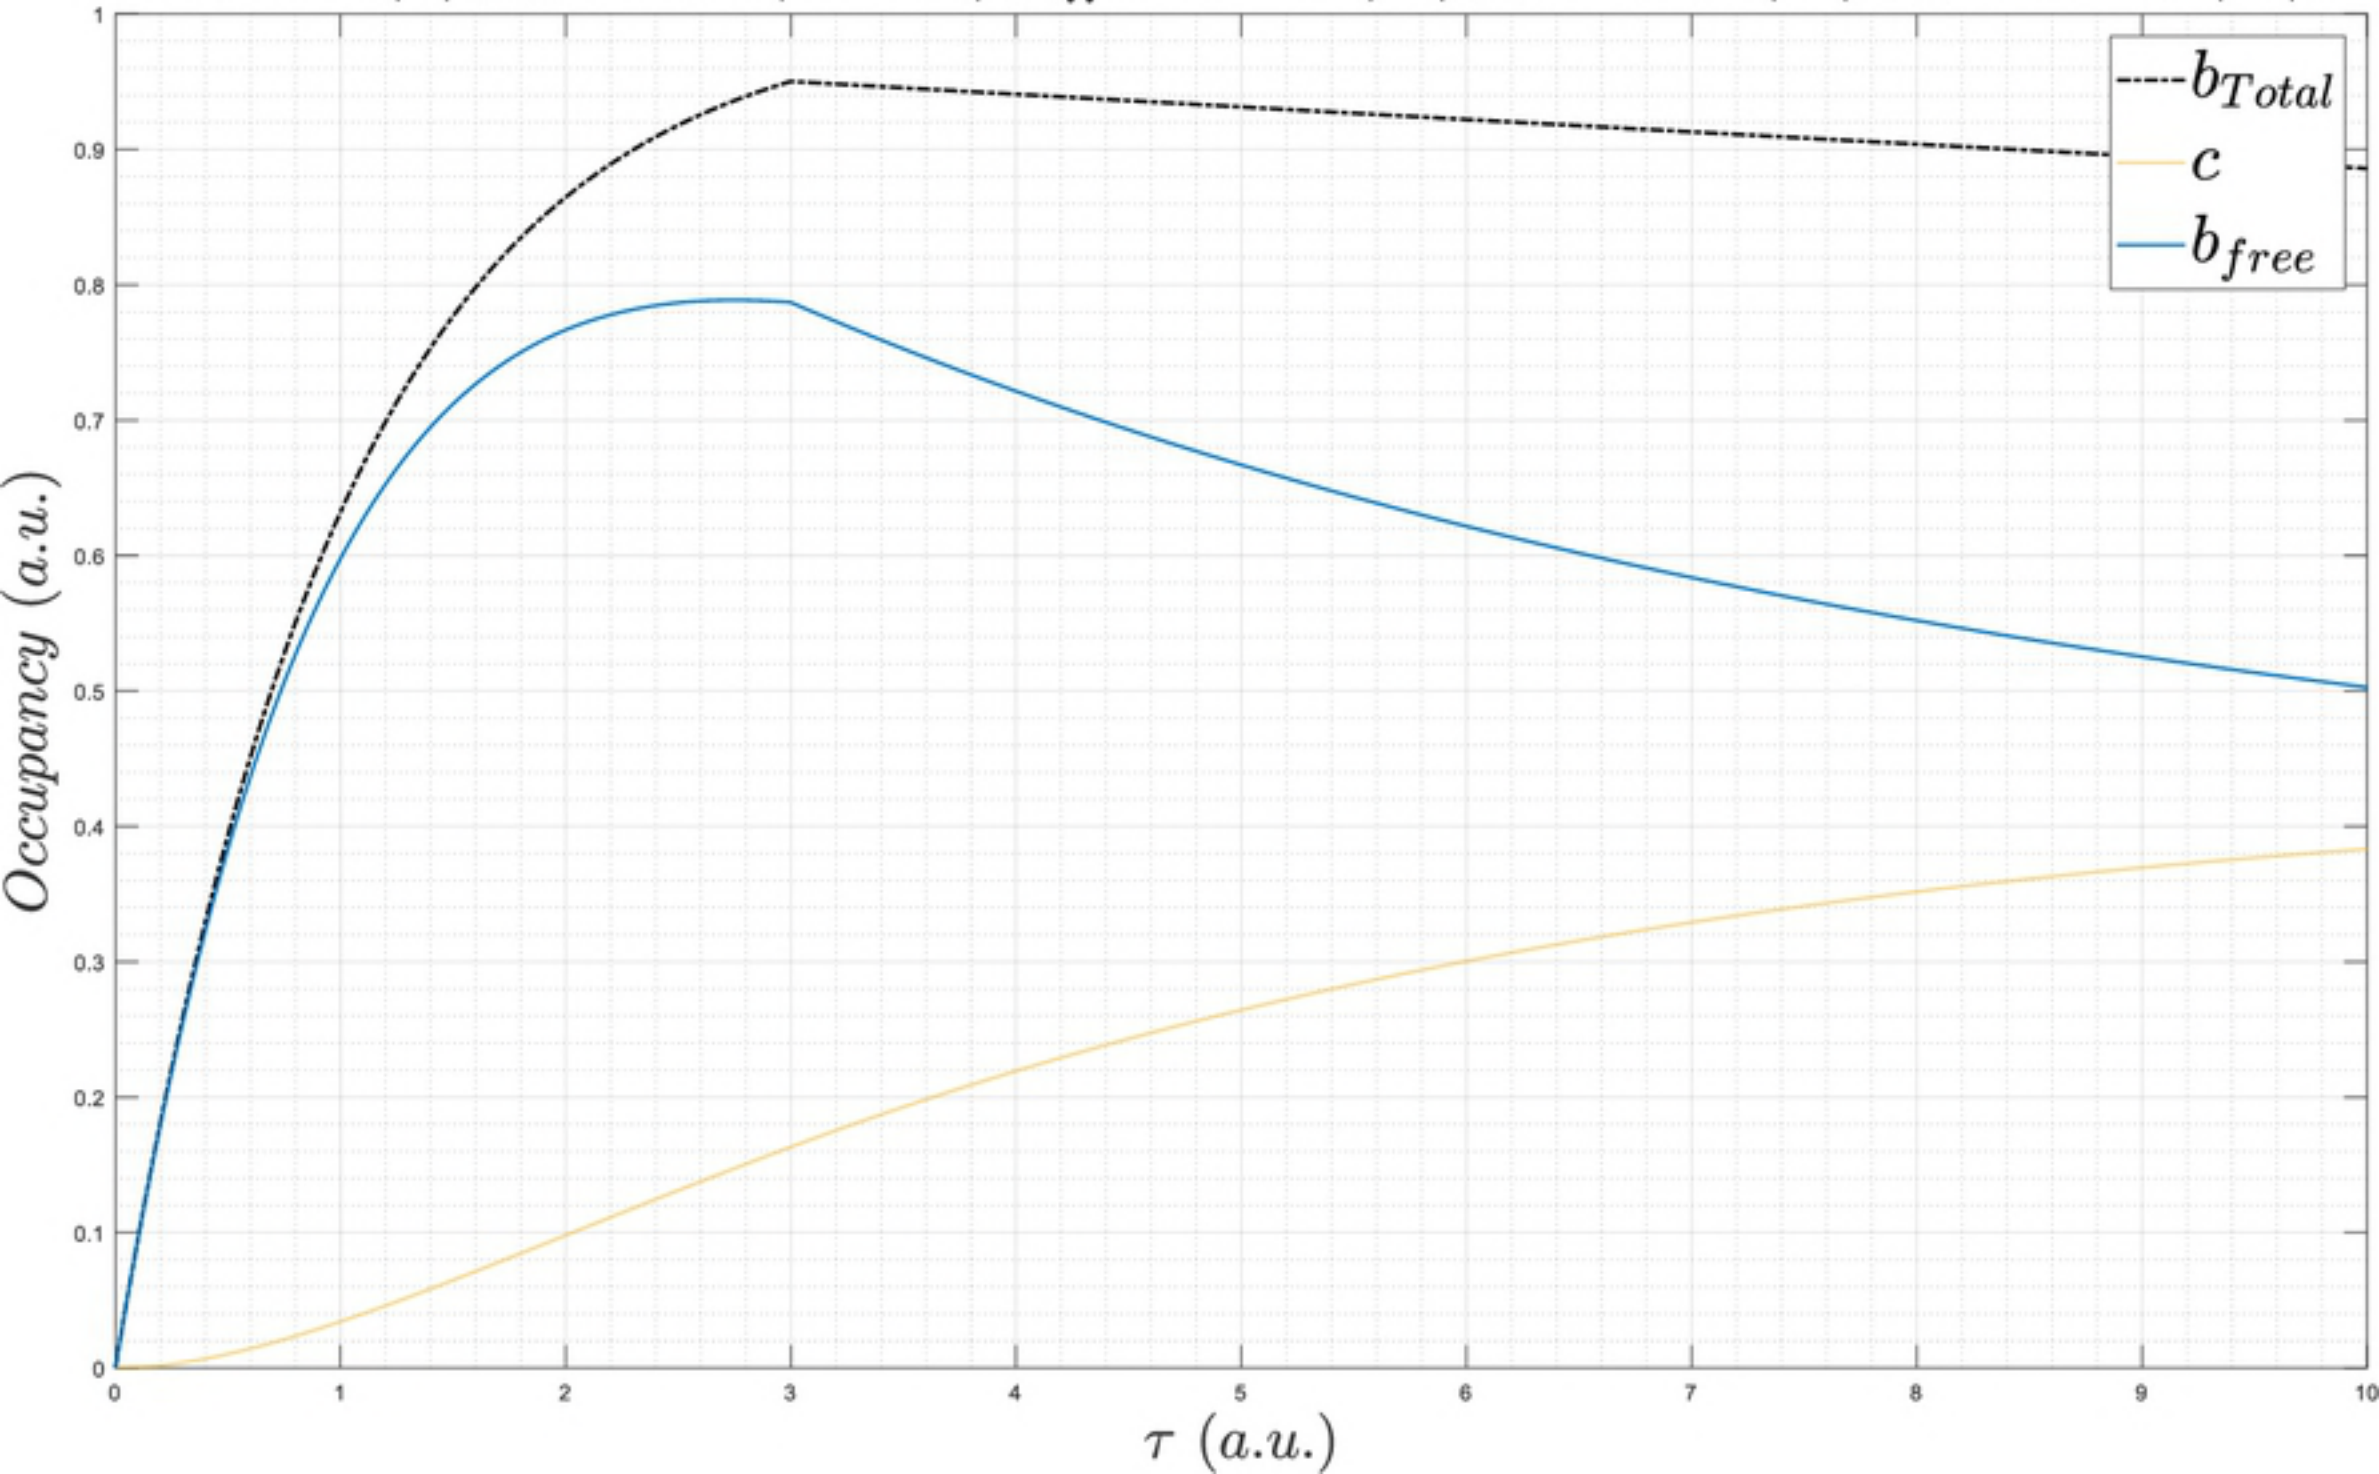

$L_0 = 1e-09$  (M) ;  $k_{on} = 1000000$  ( $M^{-1} \cdot s^{-1}$ ) ;  $k_{off} = 0.001$  ( $s^{-1}$ ) ;  $k_i = 0.0001$  ( $s^{-1}$ ) ;  $k_{-i} = 1e-06$  ( $s^{-1}$ ) ;

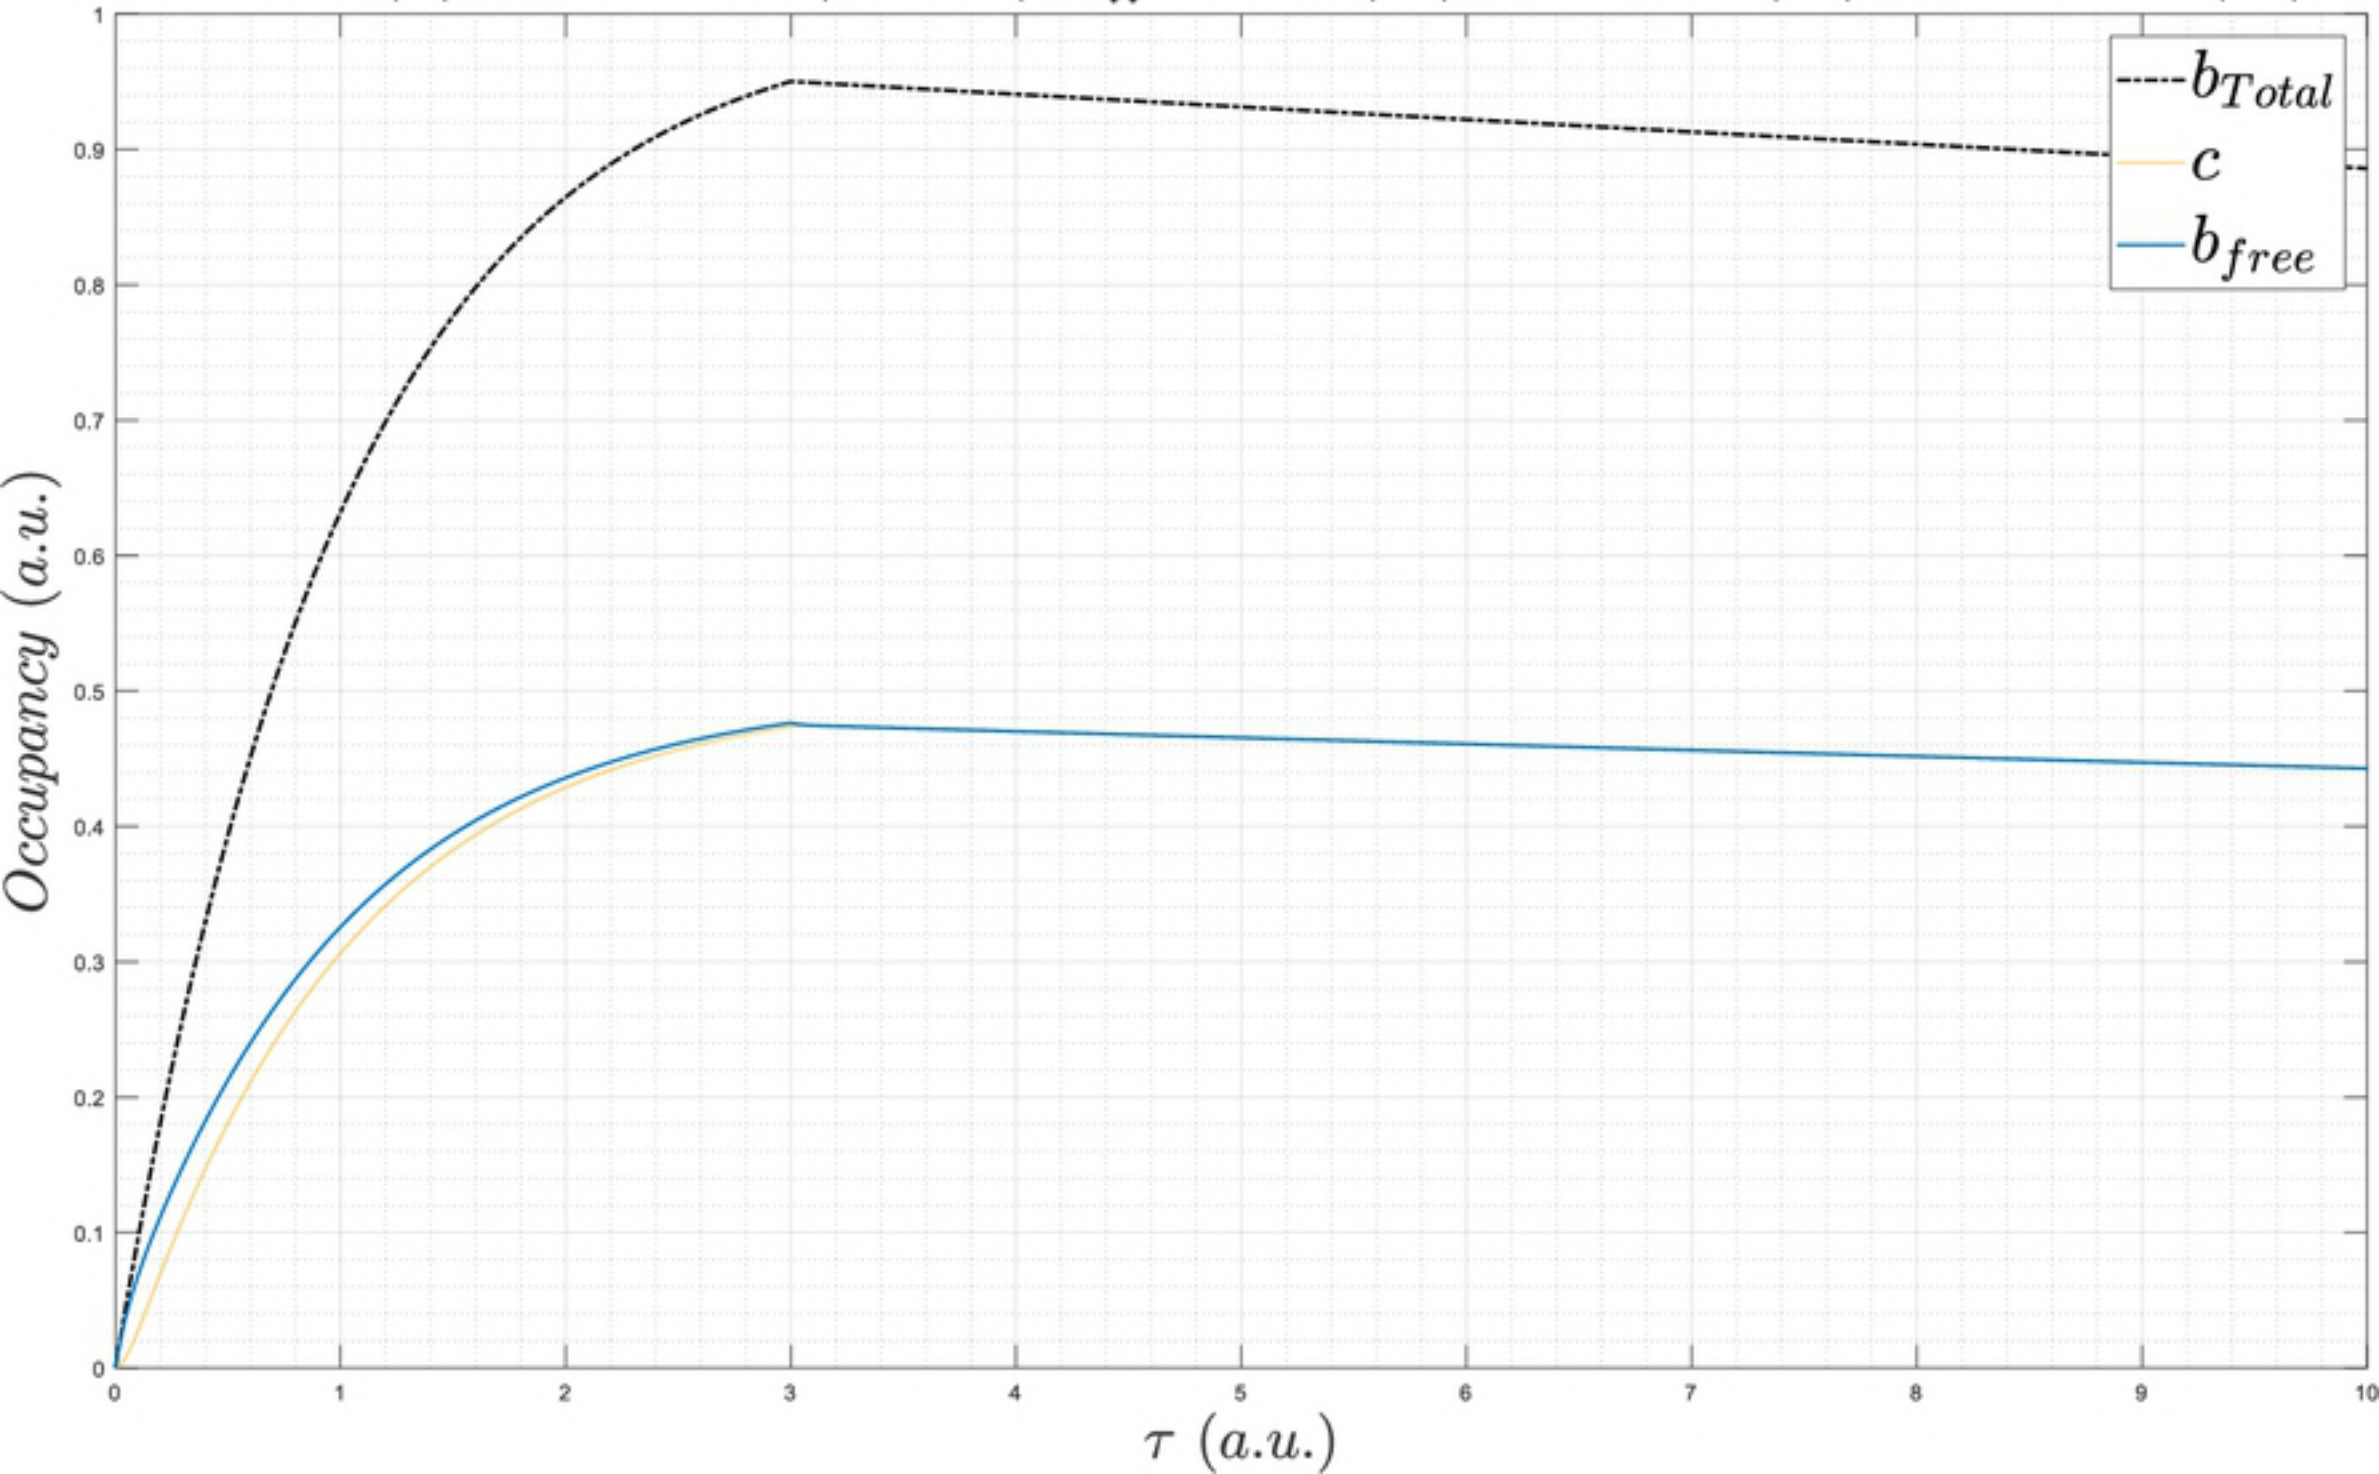



$L_0 = 1e-09$  (M) ;  $k_{on} = 1000000$  ( $M^{-1} \cdot s^{-1}$ ) ;  $k_{off} = 0.001$  ( $s^{-1}$ ) ;  $k_i = 0.0008$  ( $s^{-1}$ ) ;  $k_{-i} = 1e-05$  ( $s^{-1}$ ) ;

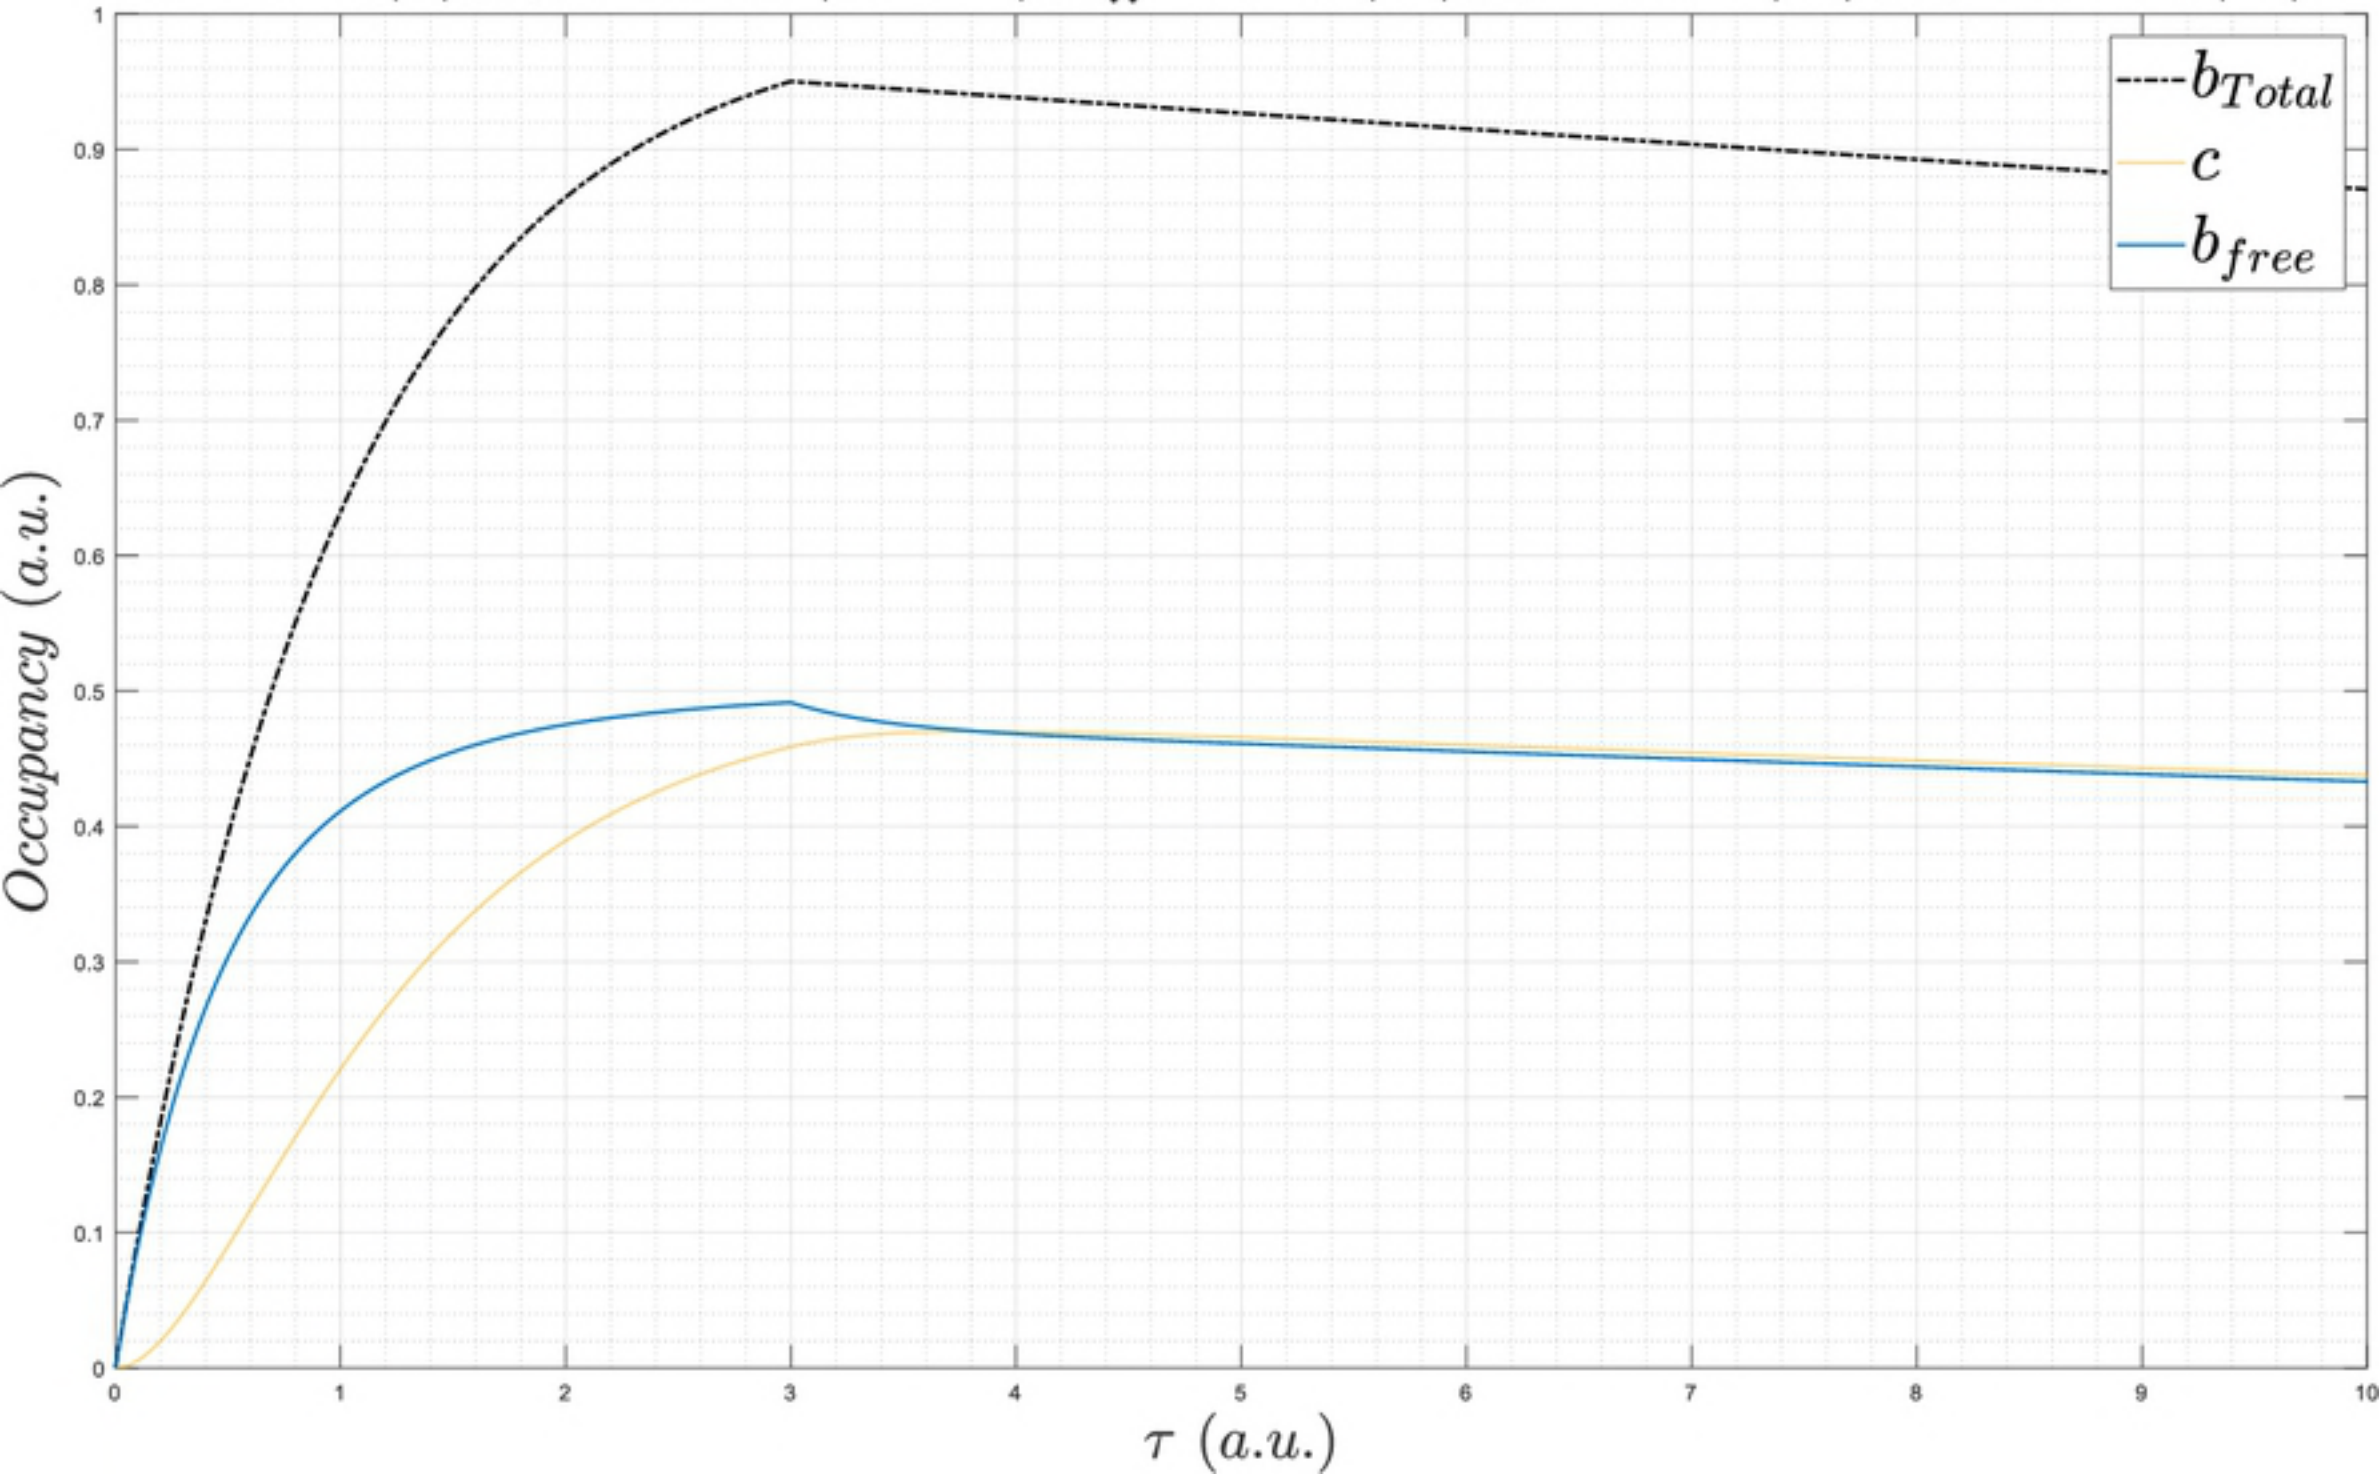

$L_0 = 1e-09$  (M) ;  $k_{on} = 1000000$  ( $M^{-1} \cdot s^{-1}$ ) ;  $k_{off} = 0.001$  ( $s^{-1}$ ) ;  $k_i = 0.003$  ( $s^{-1}$ ) ;  $k_{-i} = 0.0001$  ( $s^{-1}$ ) ;

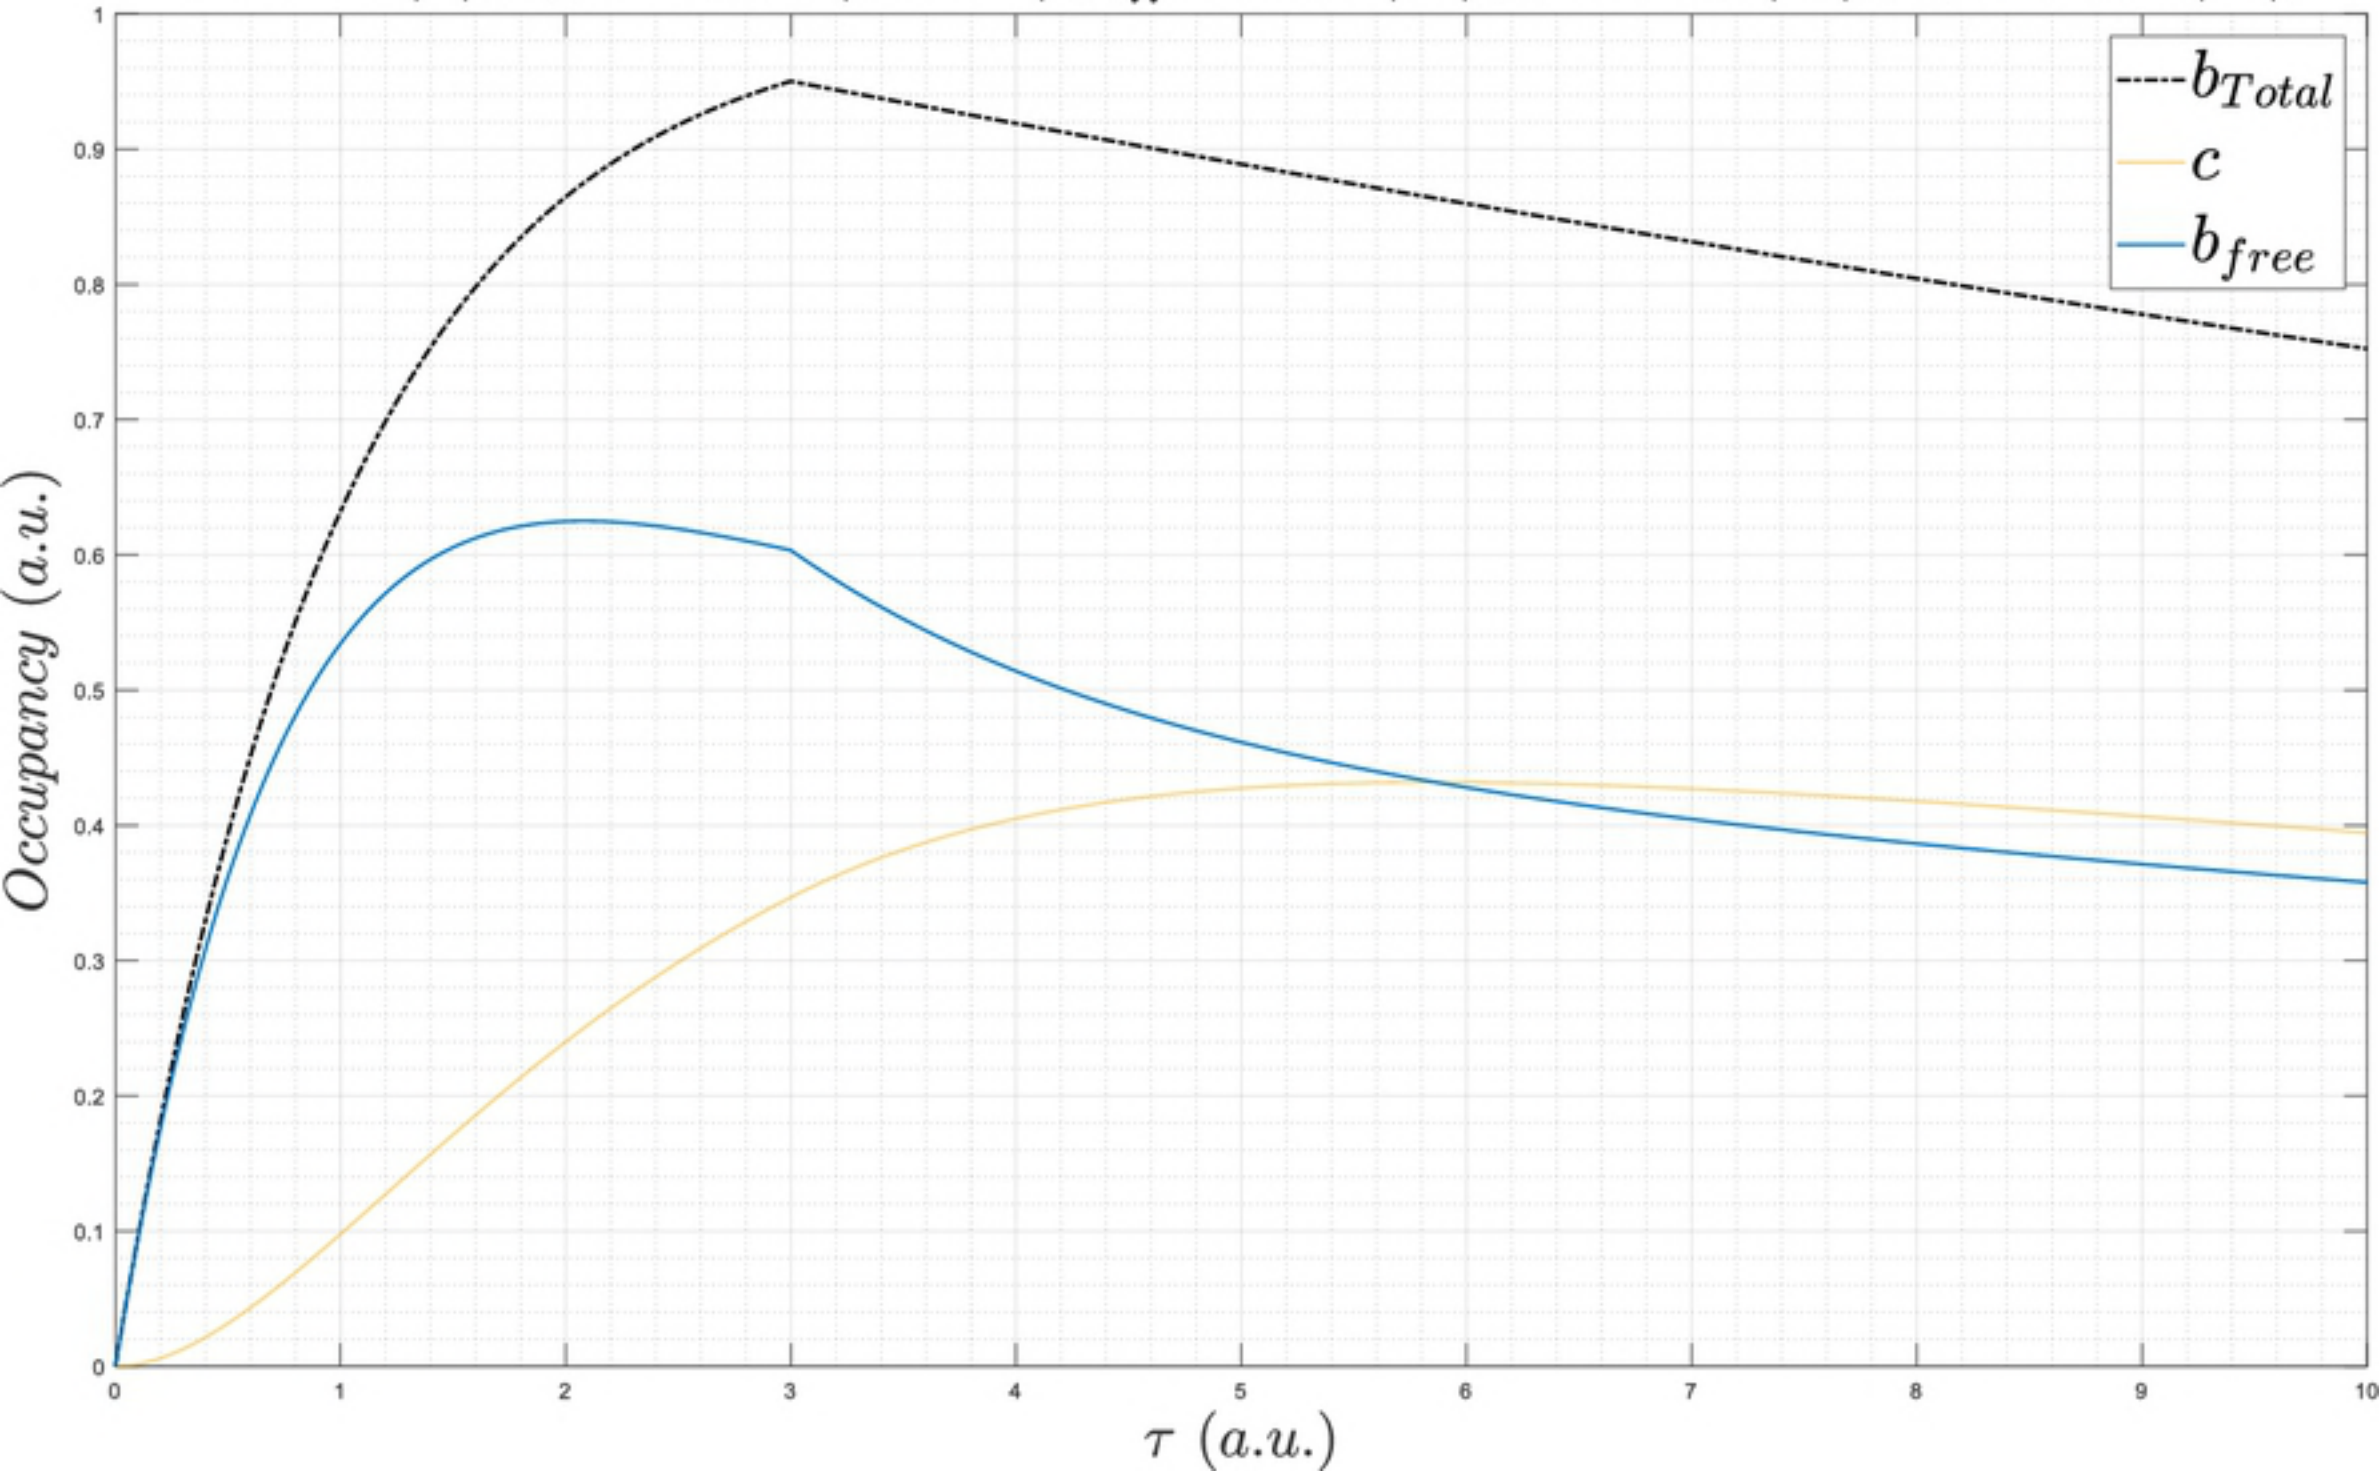

$Lo = 1e-09$  (M) ;  $k_{on} = 100000$  ( $M^{-1} \cdot s^{-1}$ ) ;  $k_{off} = 0.0001$  ( $s^{-1}$ ) ;  $k_i = 1e-07$  ( $s^{-1}$ ) ;  $k_{-i} = 1e-07$  ( $s^{-1}$ ) ;

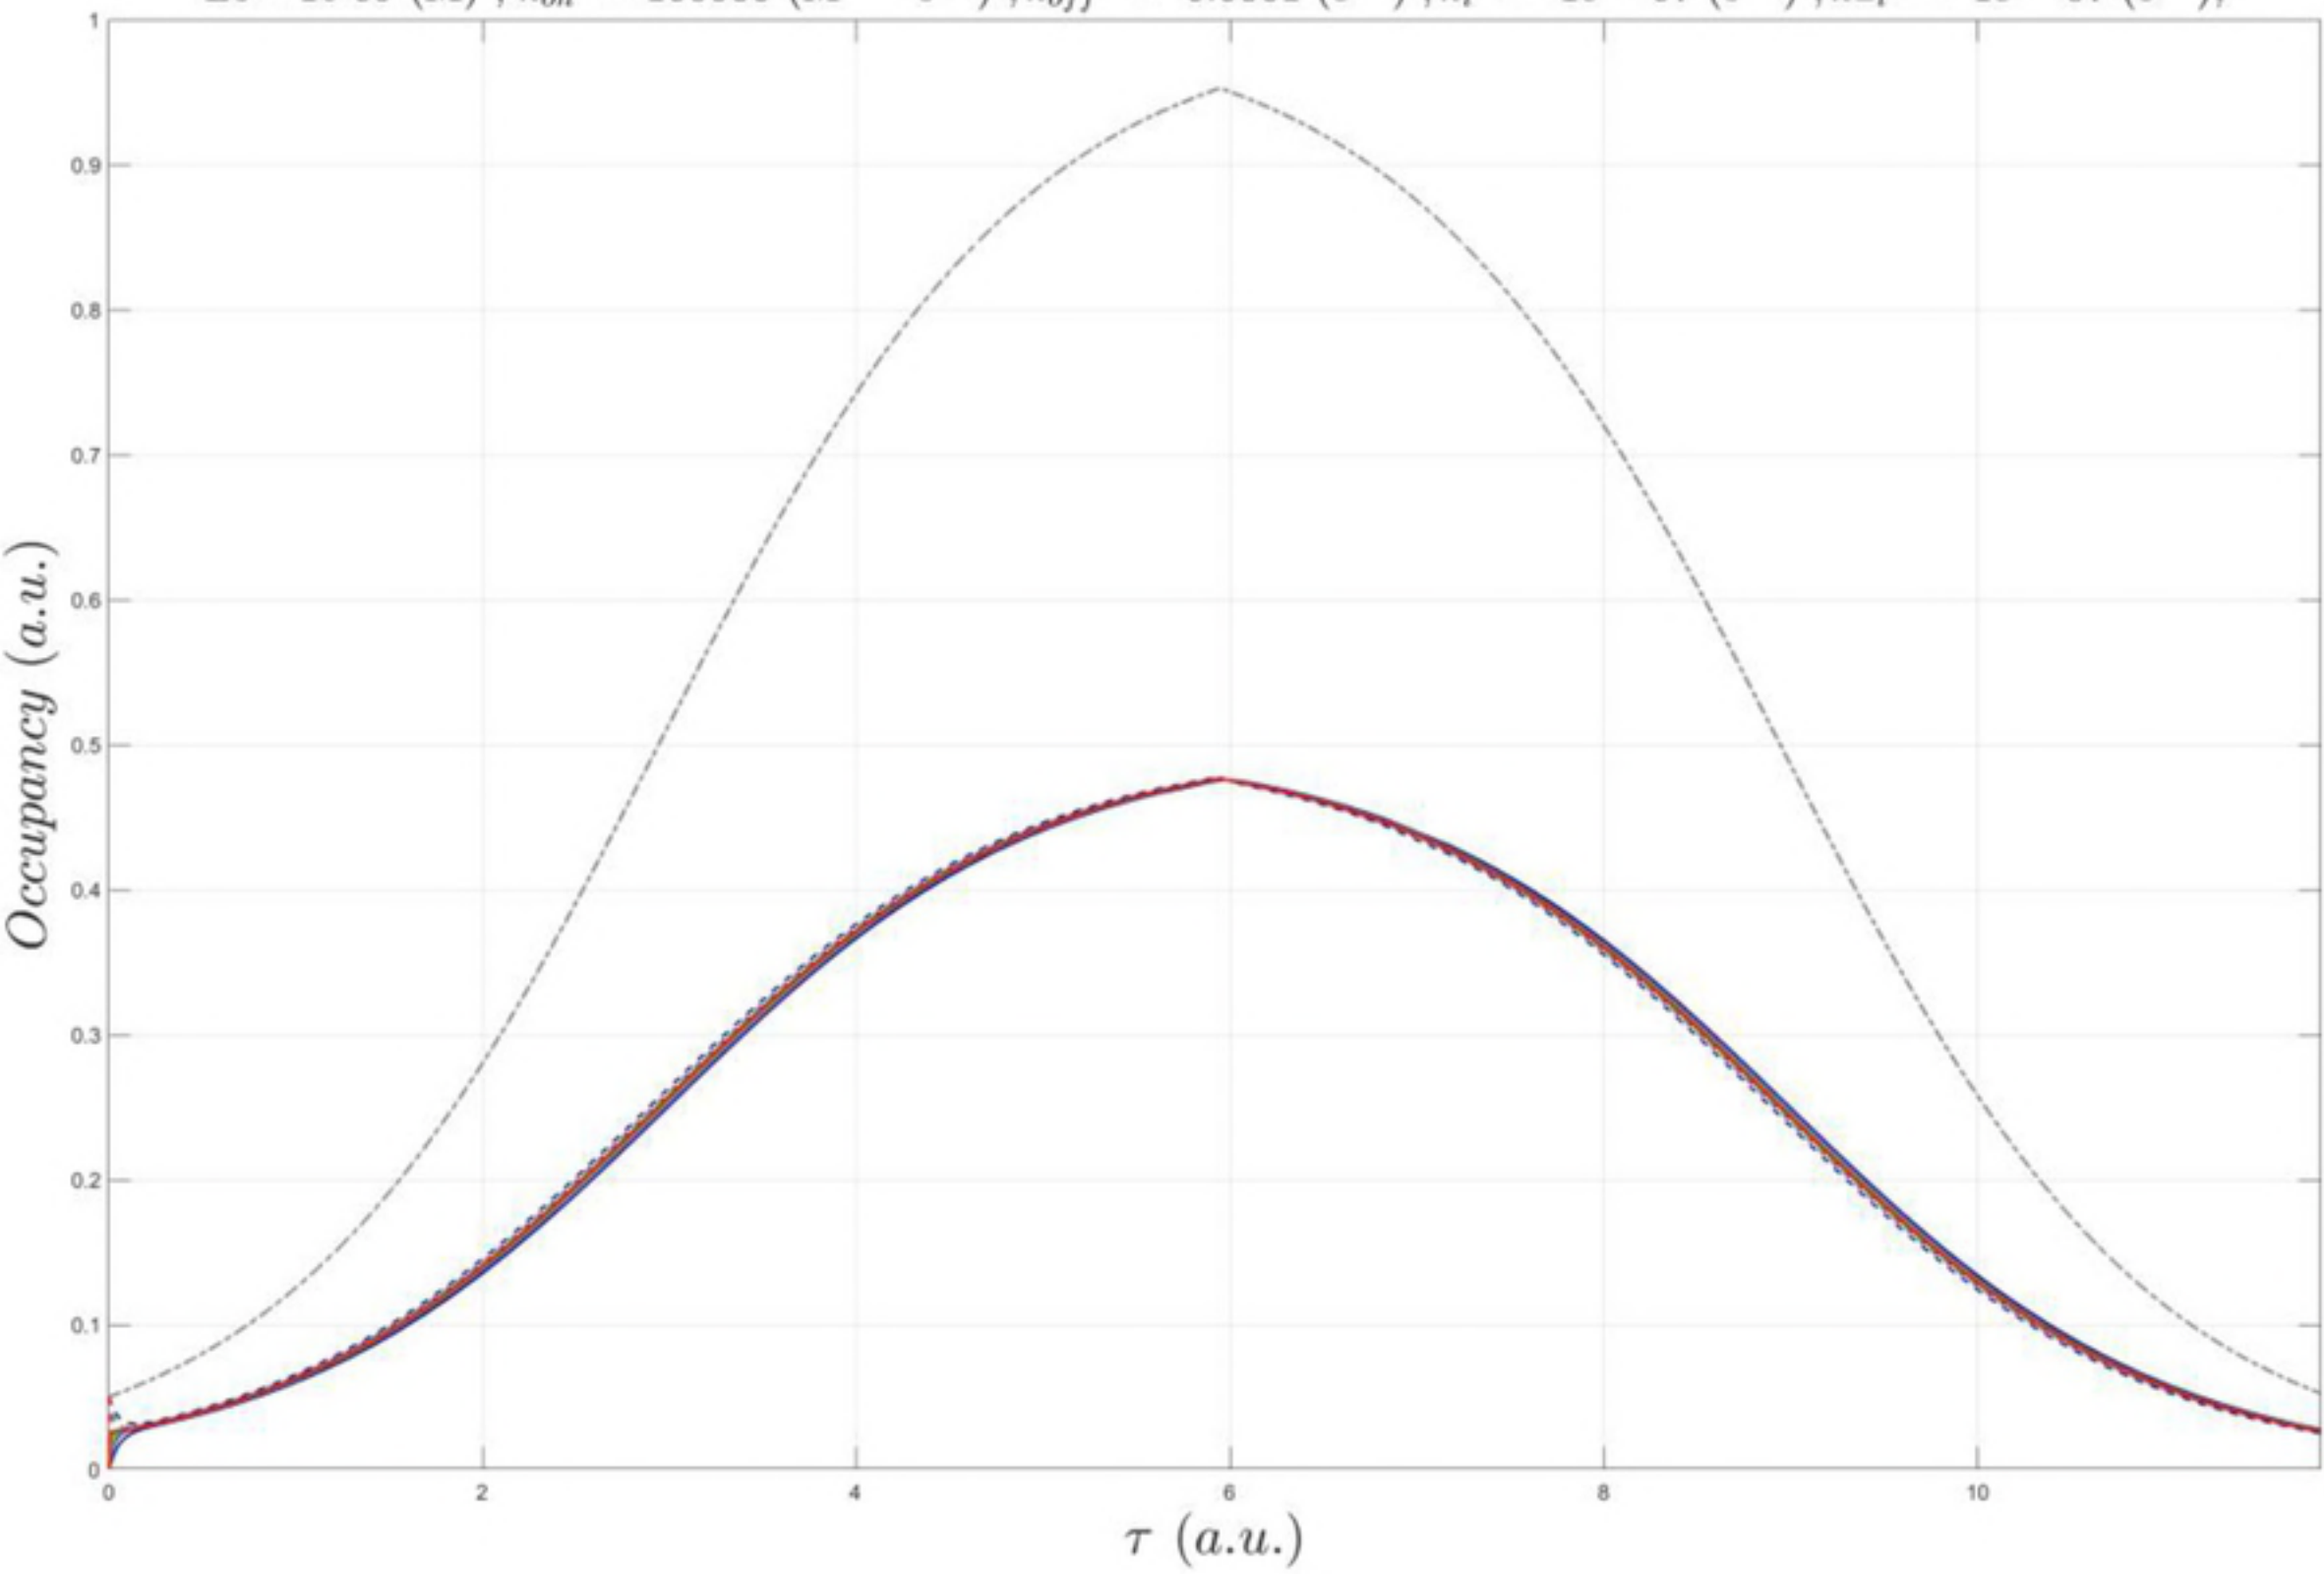

$L_0 = 1e-09$  (M) ;  $k_{on} = 100000$  ( $M^{-1} \cdot s^{-1}$ ) ;  $k_{off} = 0.0001$  ( $s^{-1}$ ) ;  $k_i = 1e-06$  ( $s^{-1}$ ) ;  $k_{-i} = 1e-06$  ( $s^{-1}$ ) ;

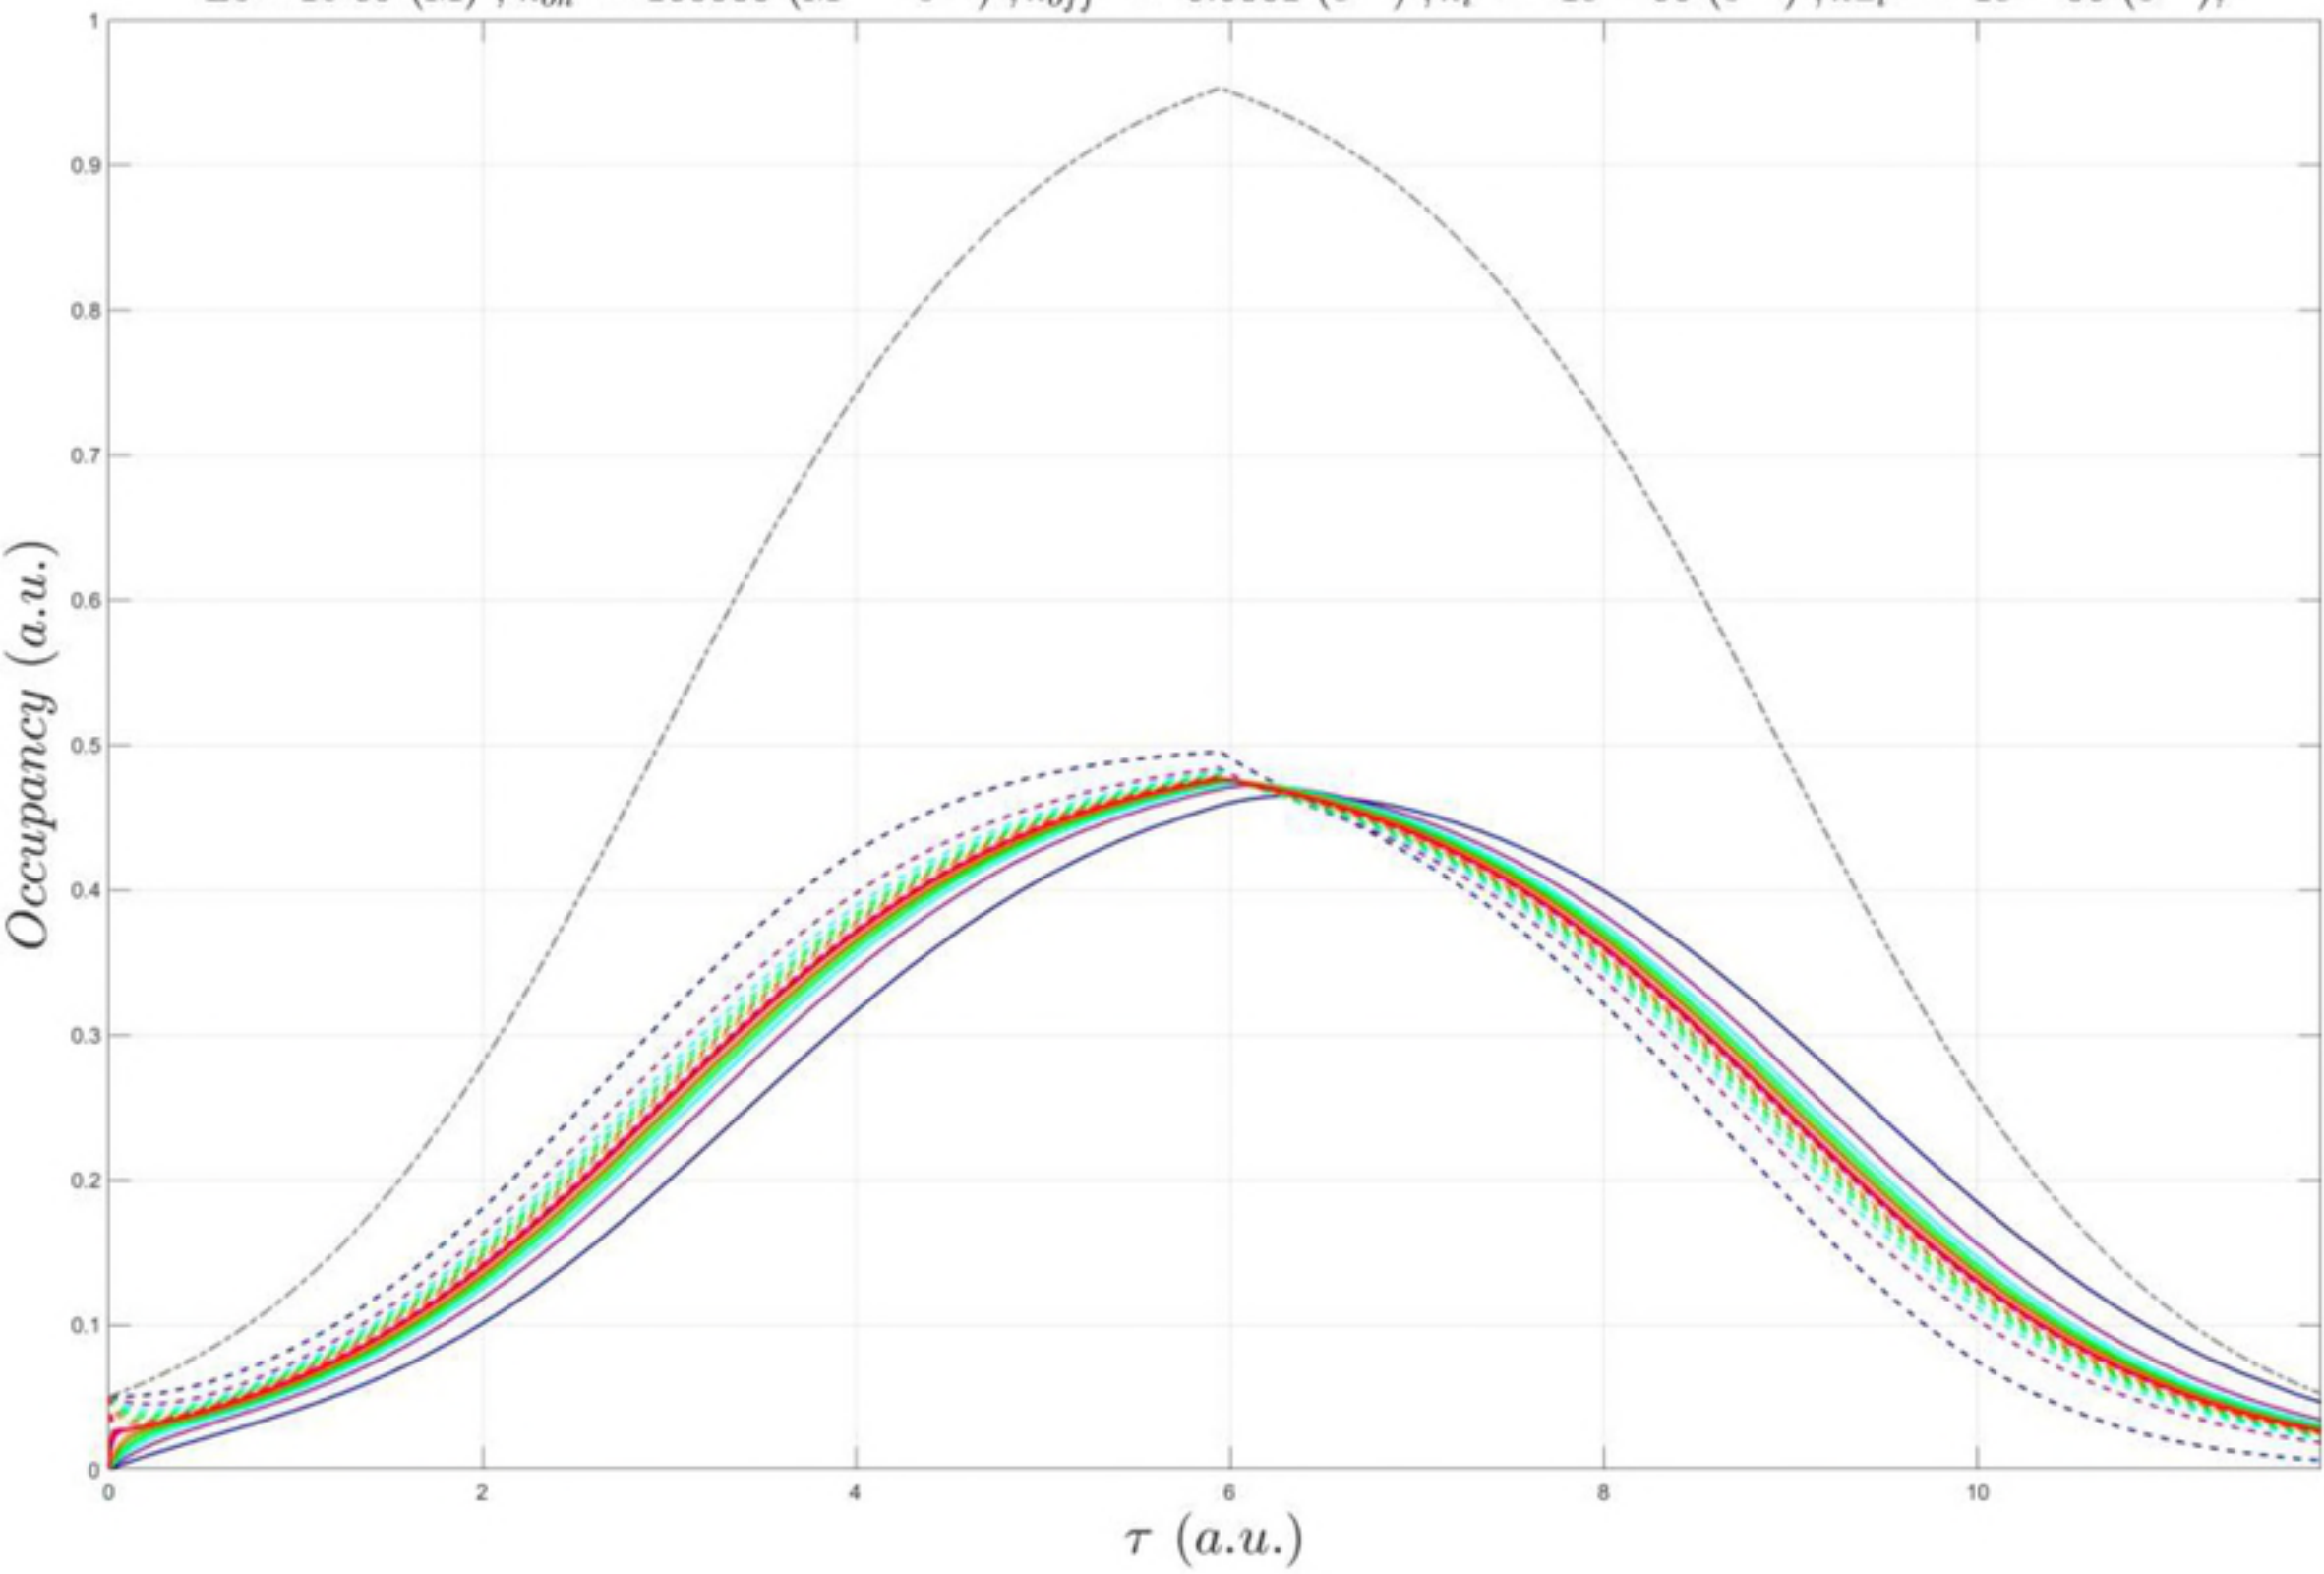



$L_0 = 1e-09$  (M) ;  $k_{on} = 100000$  ( $M^{-1} \cdot s^{-1}$ ) ;  $k_{off} = 0.0001$  ( $s^{-1}$ ) ;  $k_i = 0.0001$  ( $s^{-1}$ ) ;  $k_{-i} = 0.0001$  ( $s^{-1}$ ) ;

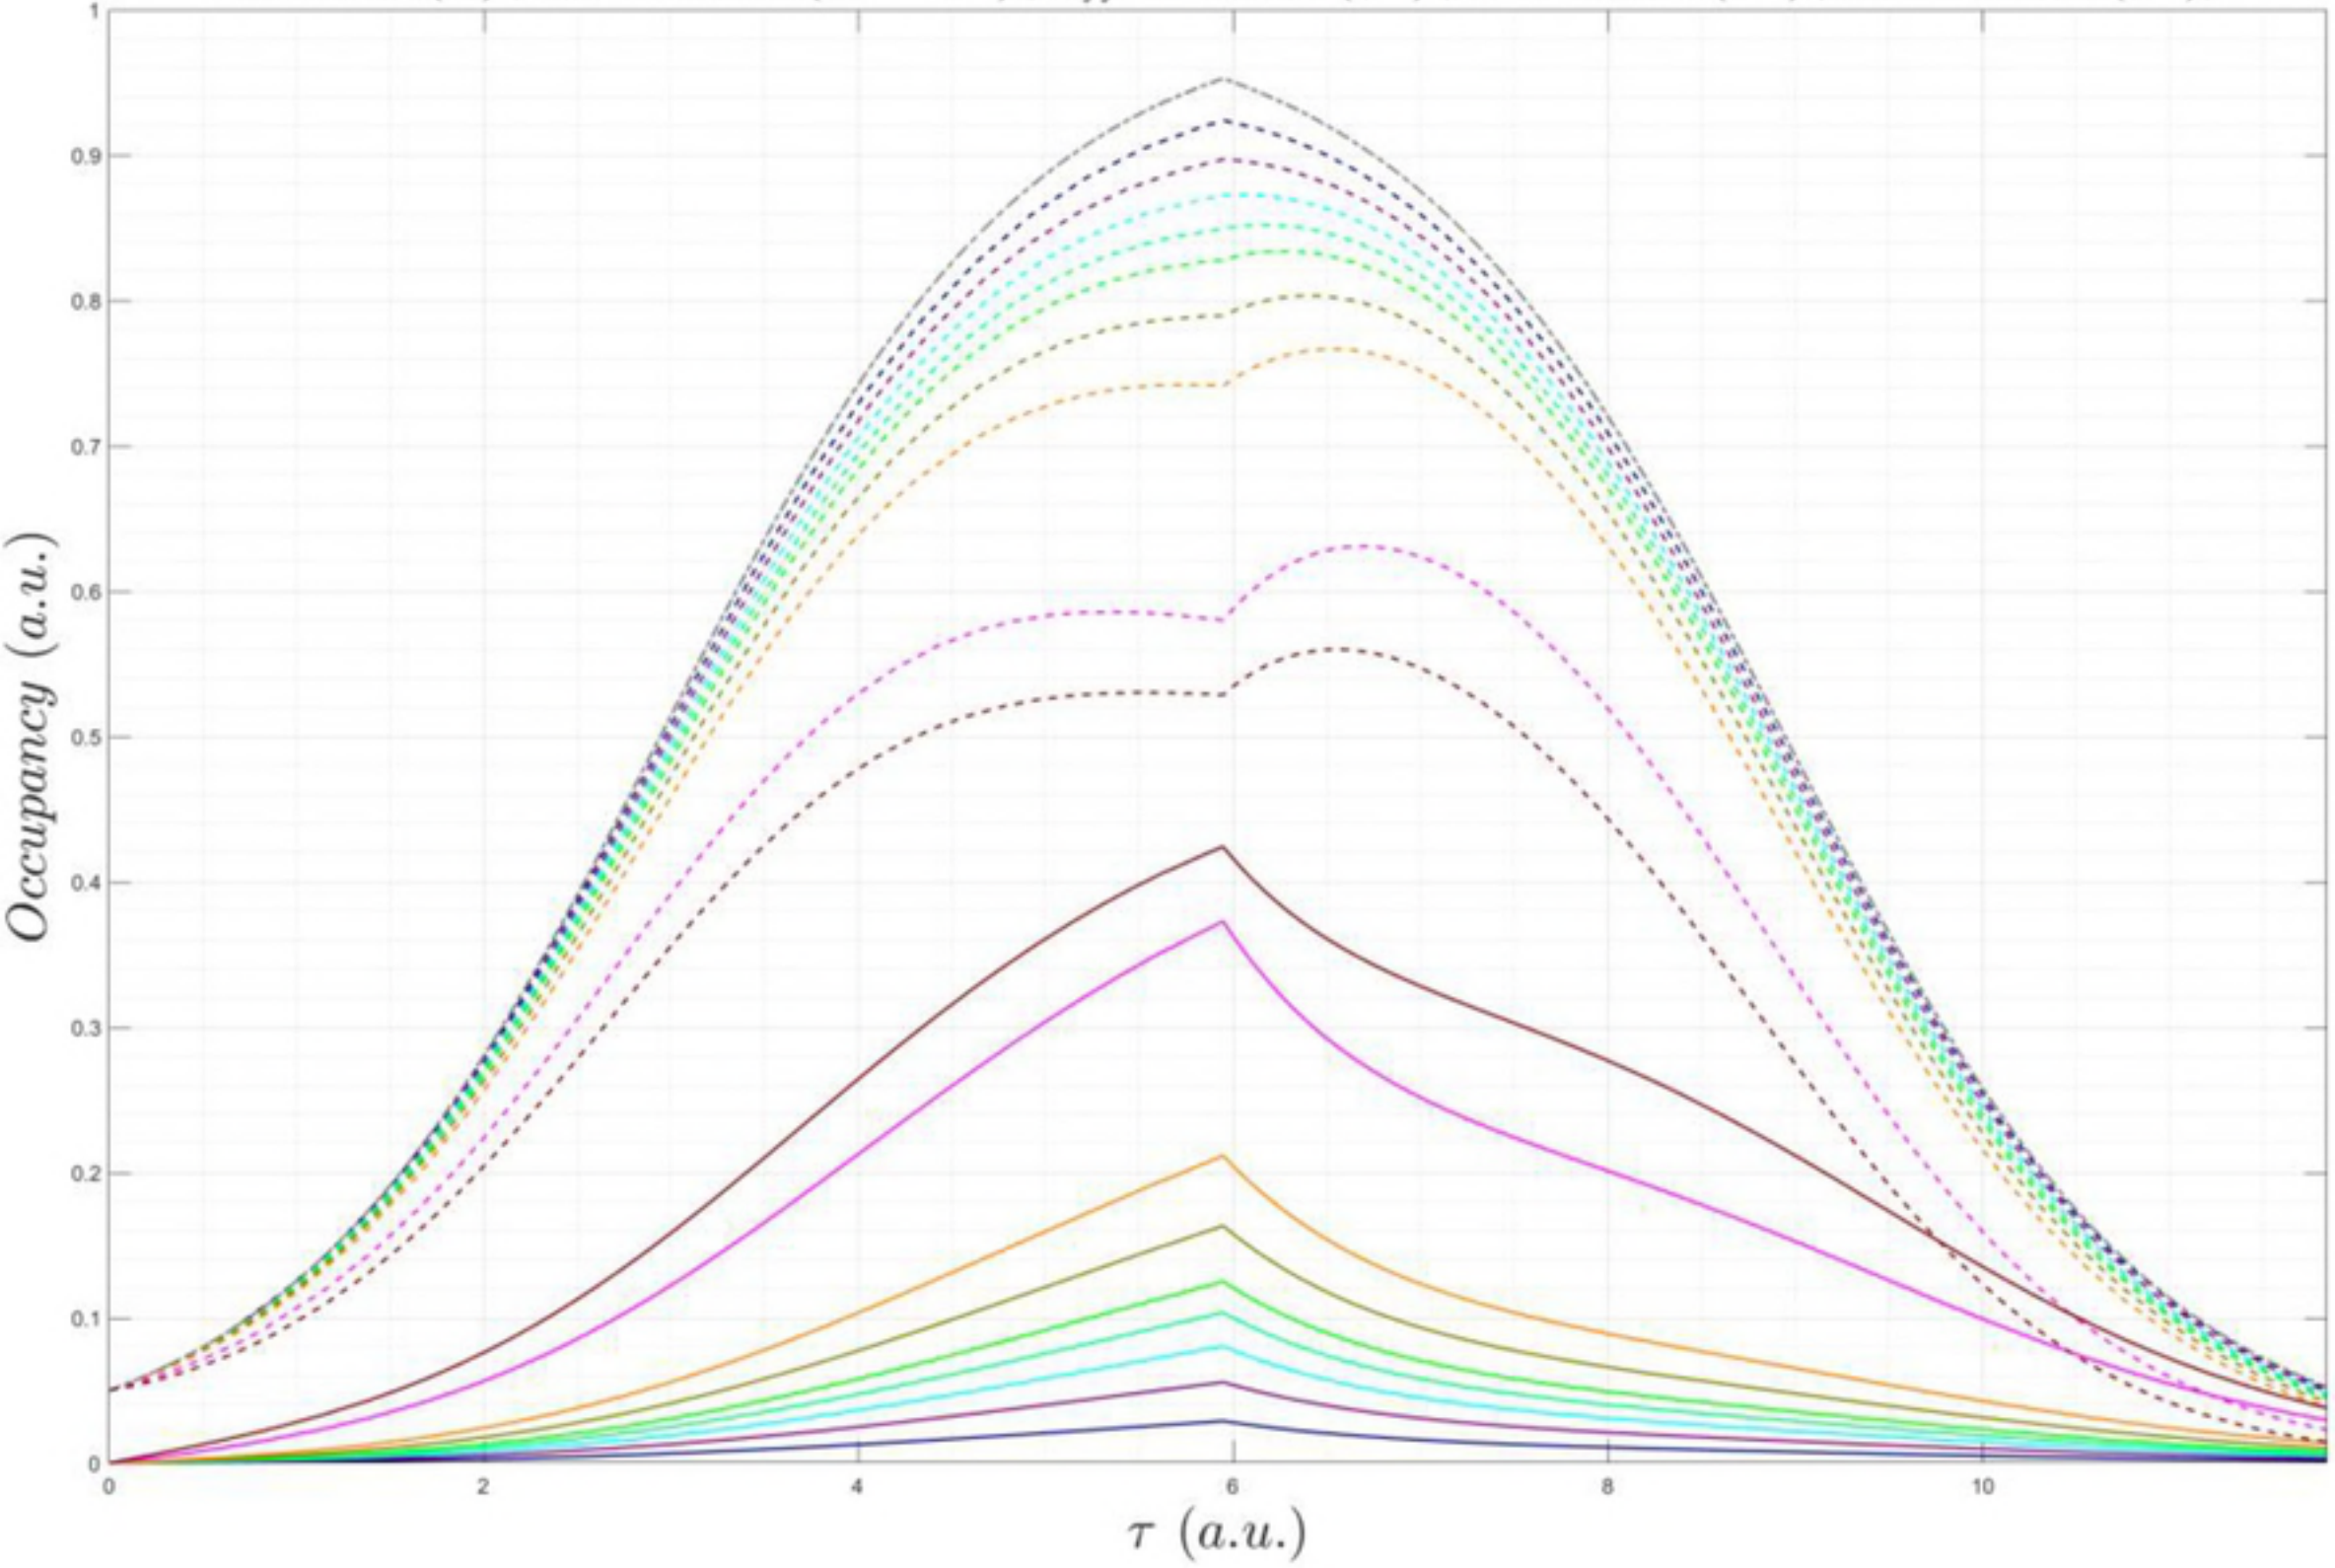

$L_0 = 1e-09$  (M) ;  $k_{on} = 100000$  ( $M^{-1} \cdot s^{-1}$ ) ;  $k_{off} = 0.0001$  ( $s^{-1}$ ) ;  $k_i = 0.001$  ( $s^{-1}$ ) ;  $k_{-i} = 0.001$  ( $s^{-1}$ );

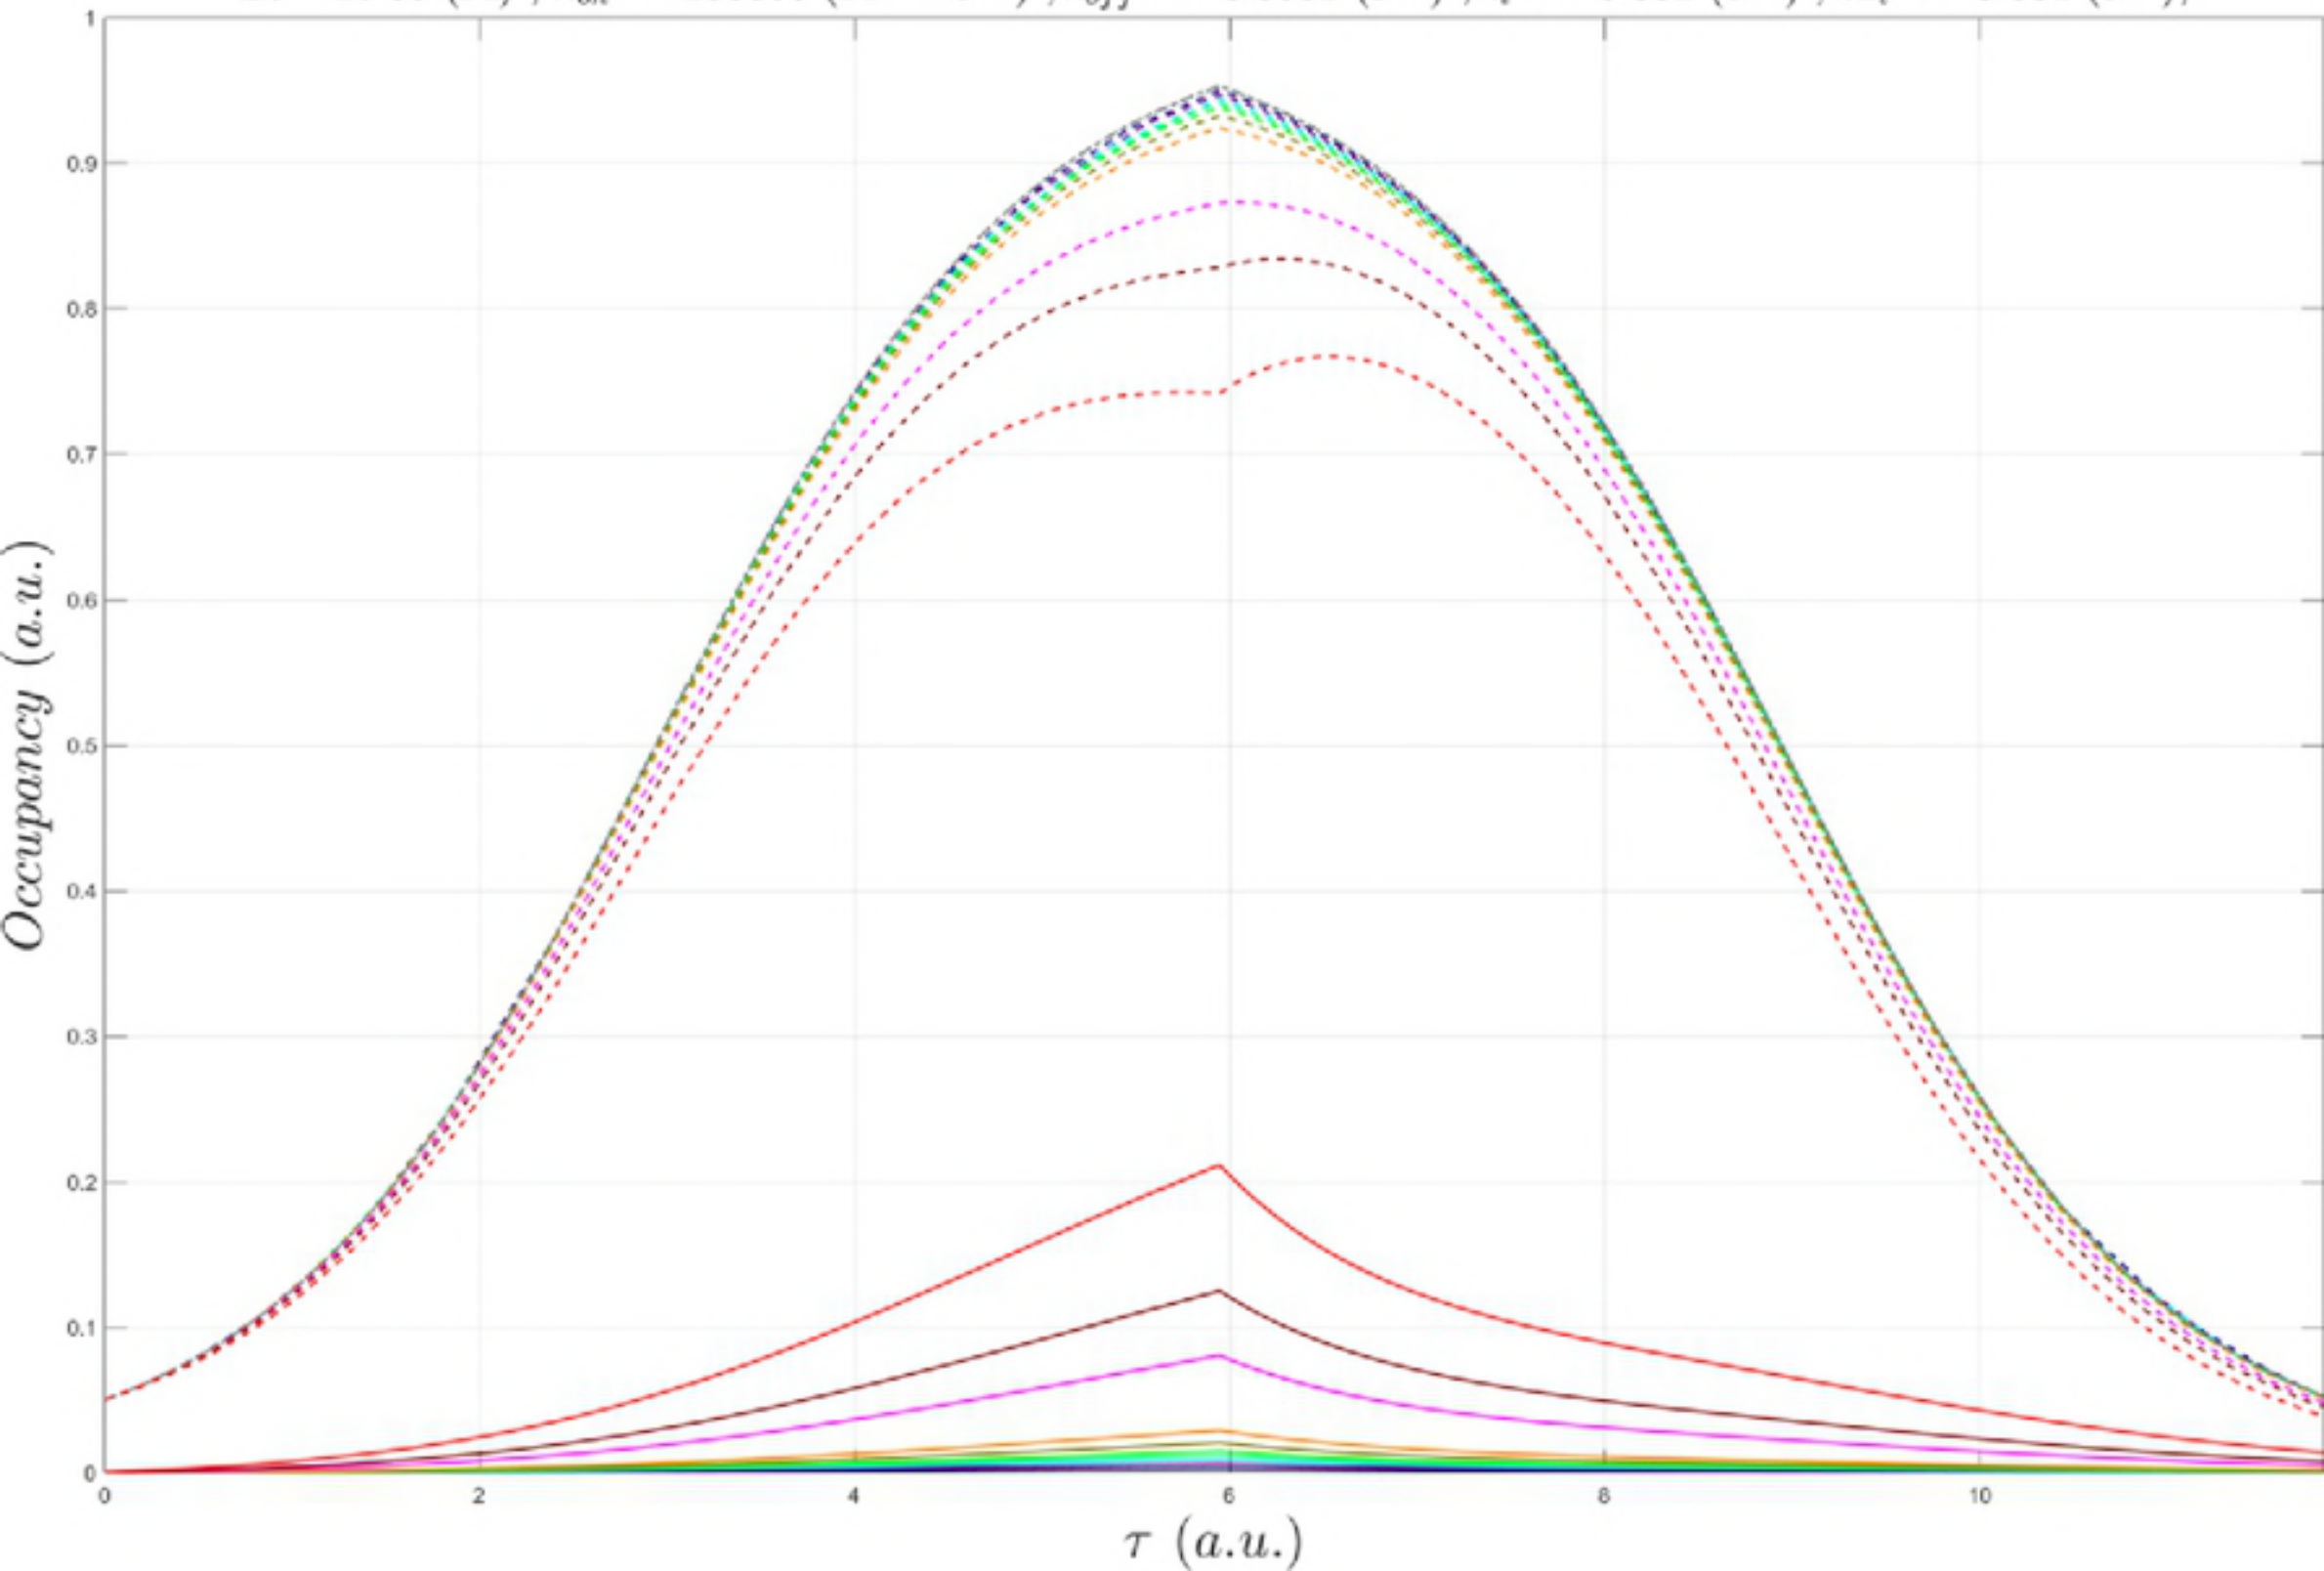

$L_0 = 1e-09$  (M) ;  $k_{on} = 1$  ( $M^{-1} \cdot s^{-1}$ ) ;  $k_{off} = 1$  ( $s^{-1}$ ) ;  $k_i = 0.01$  ( $s^{-1}$ ) ;  $k_{-i} = 0.01$  ( $s^{-1}$ );

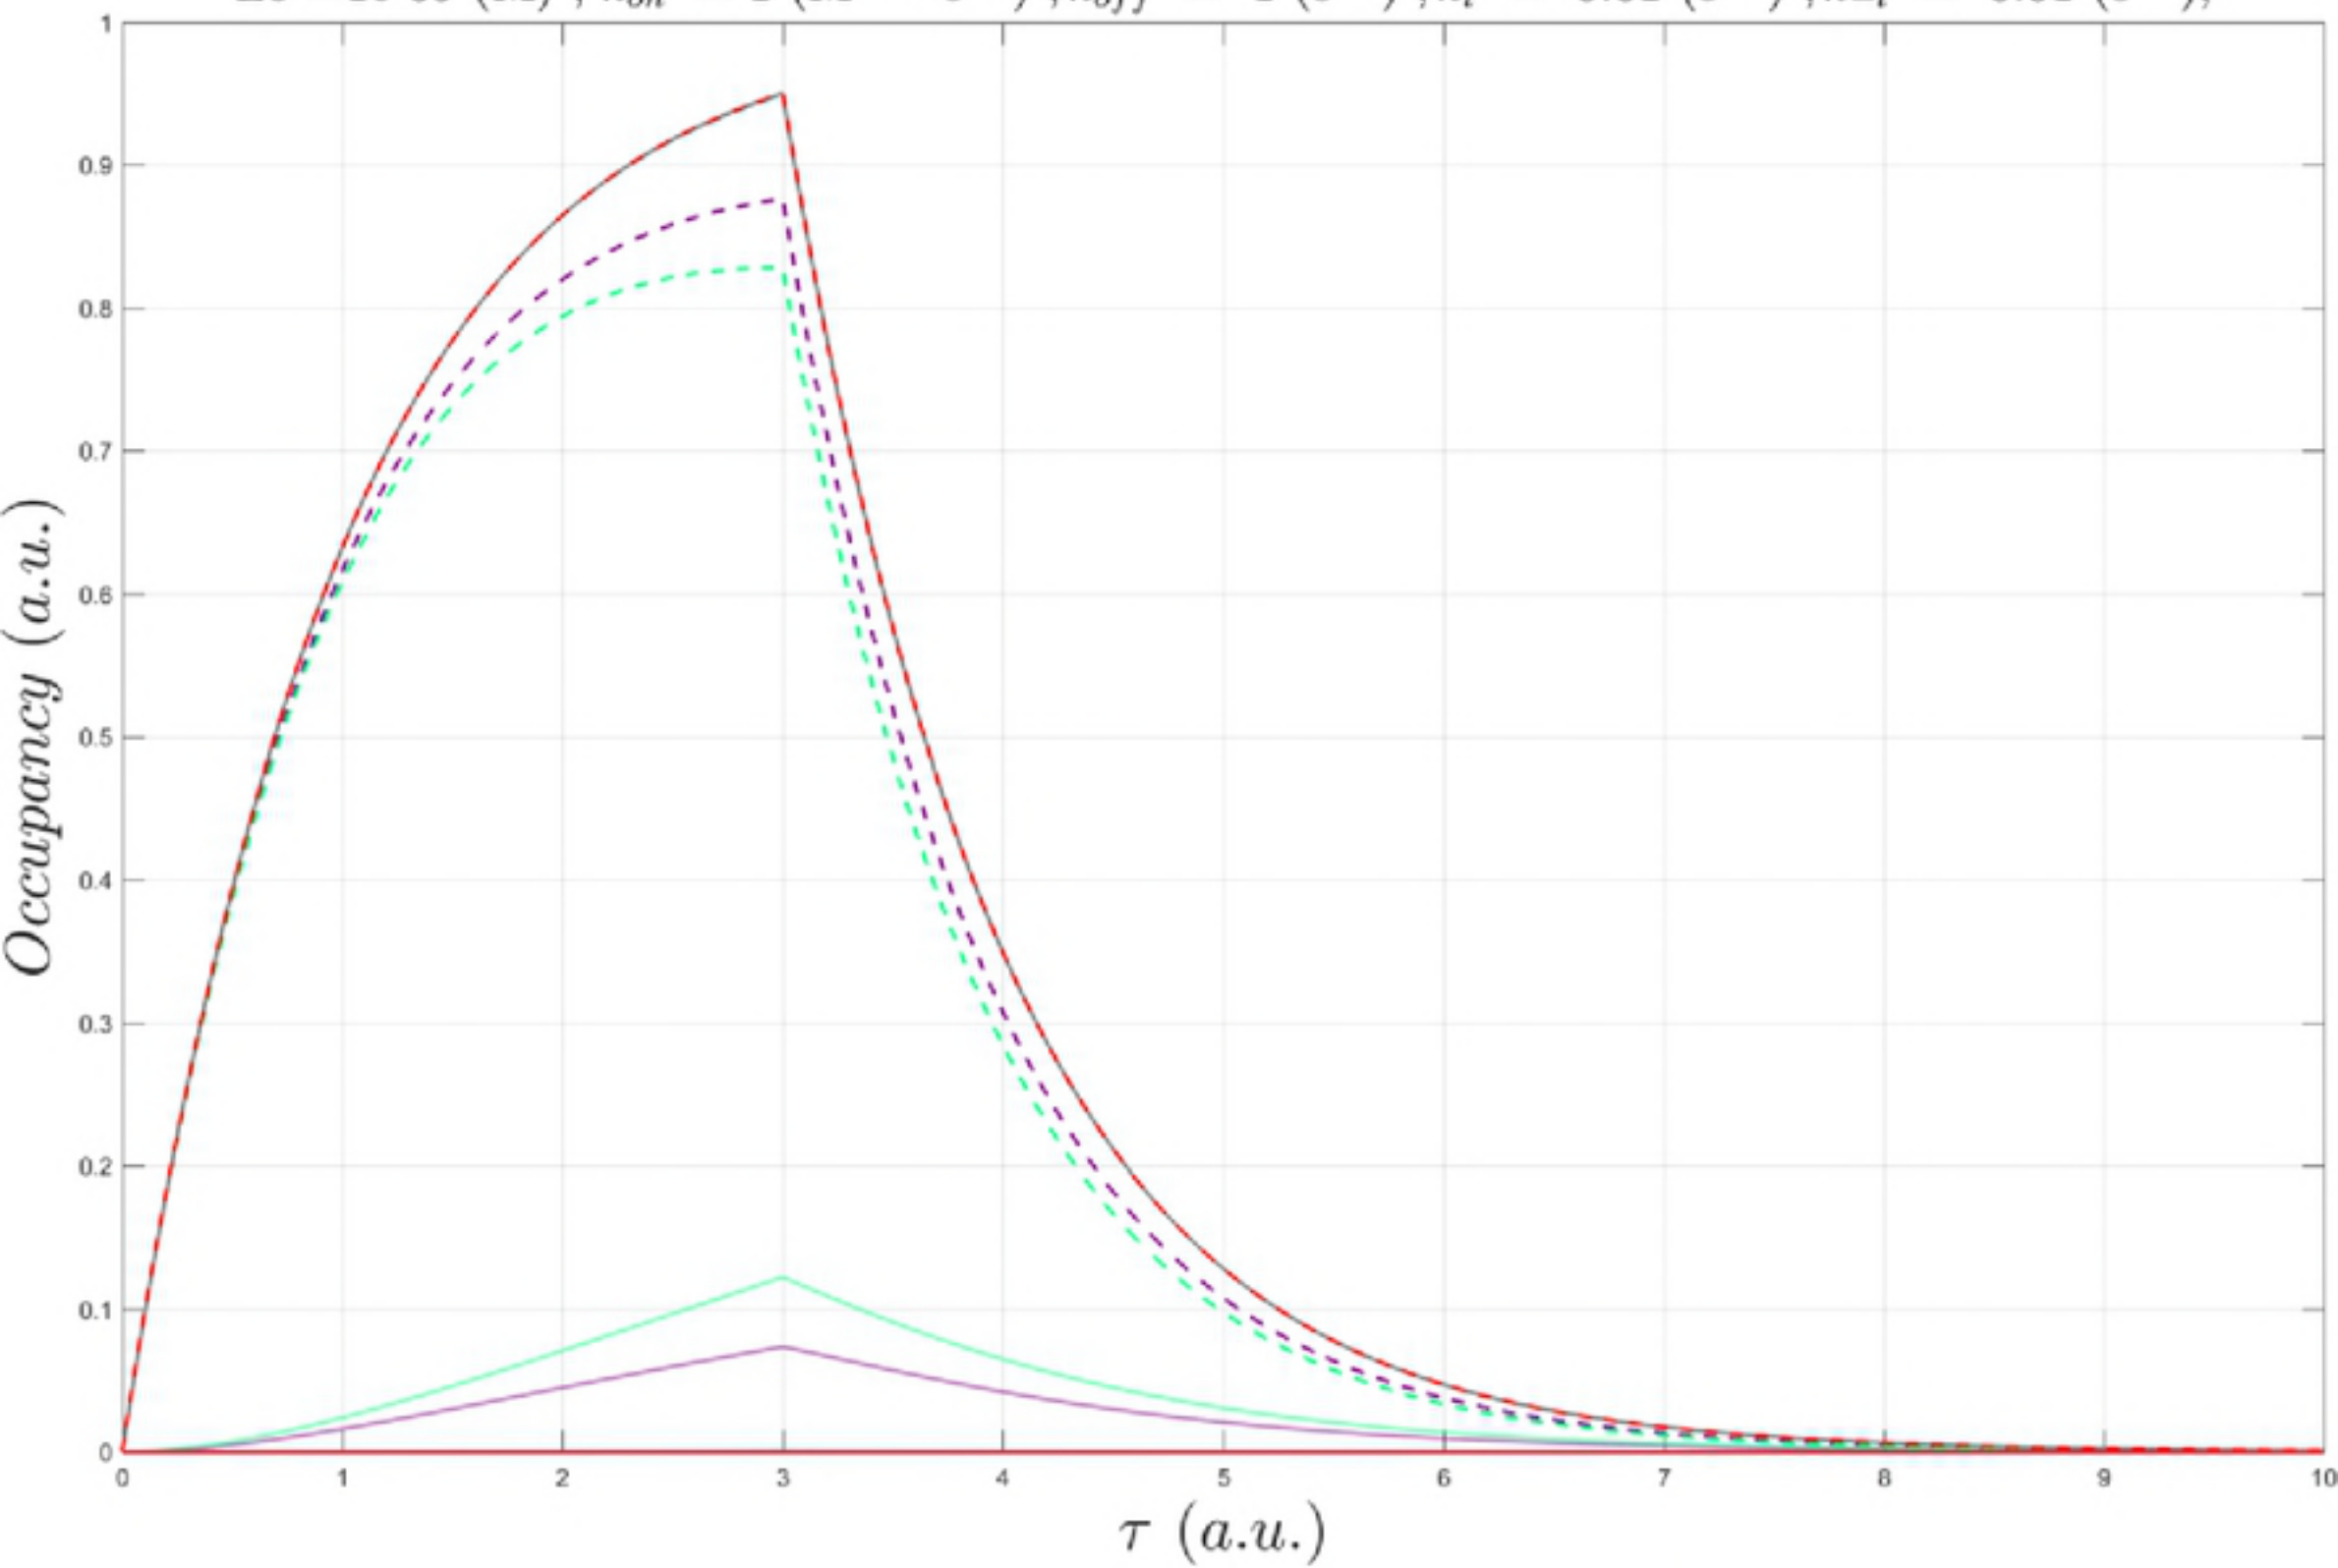





$Lo = 4.05e-08$  (M) ;  $k_{on} = 1$  ( $M^{-1} \cdot s^{-1}$ ) ;  $k_{off} = 1$  ( $s^{-1}$ ) ;  $k_i = 0.01$  ( $s^{-1}$ ) ;  $k_{-i} = 0.01$  ( $s^{-1}$ ) ;

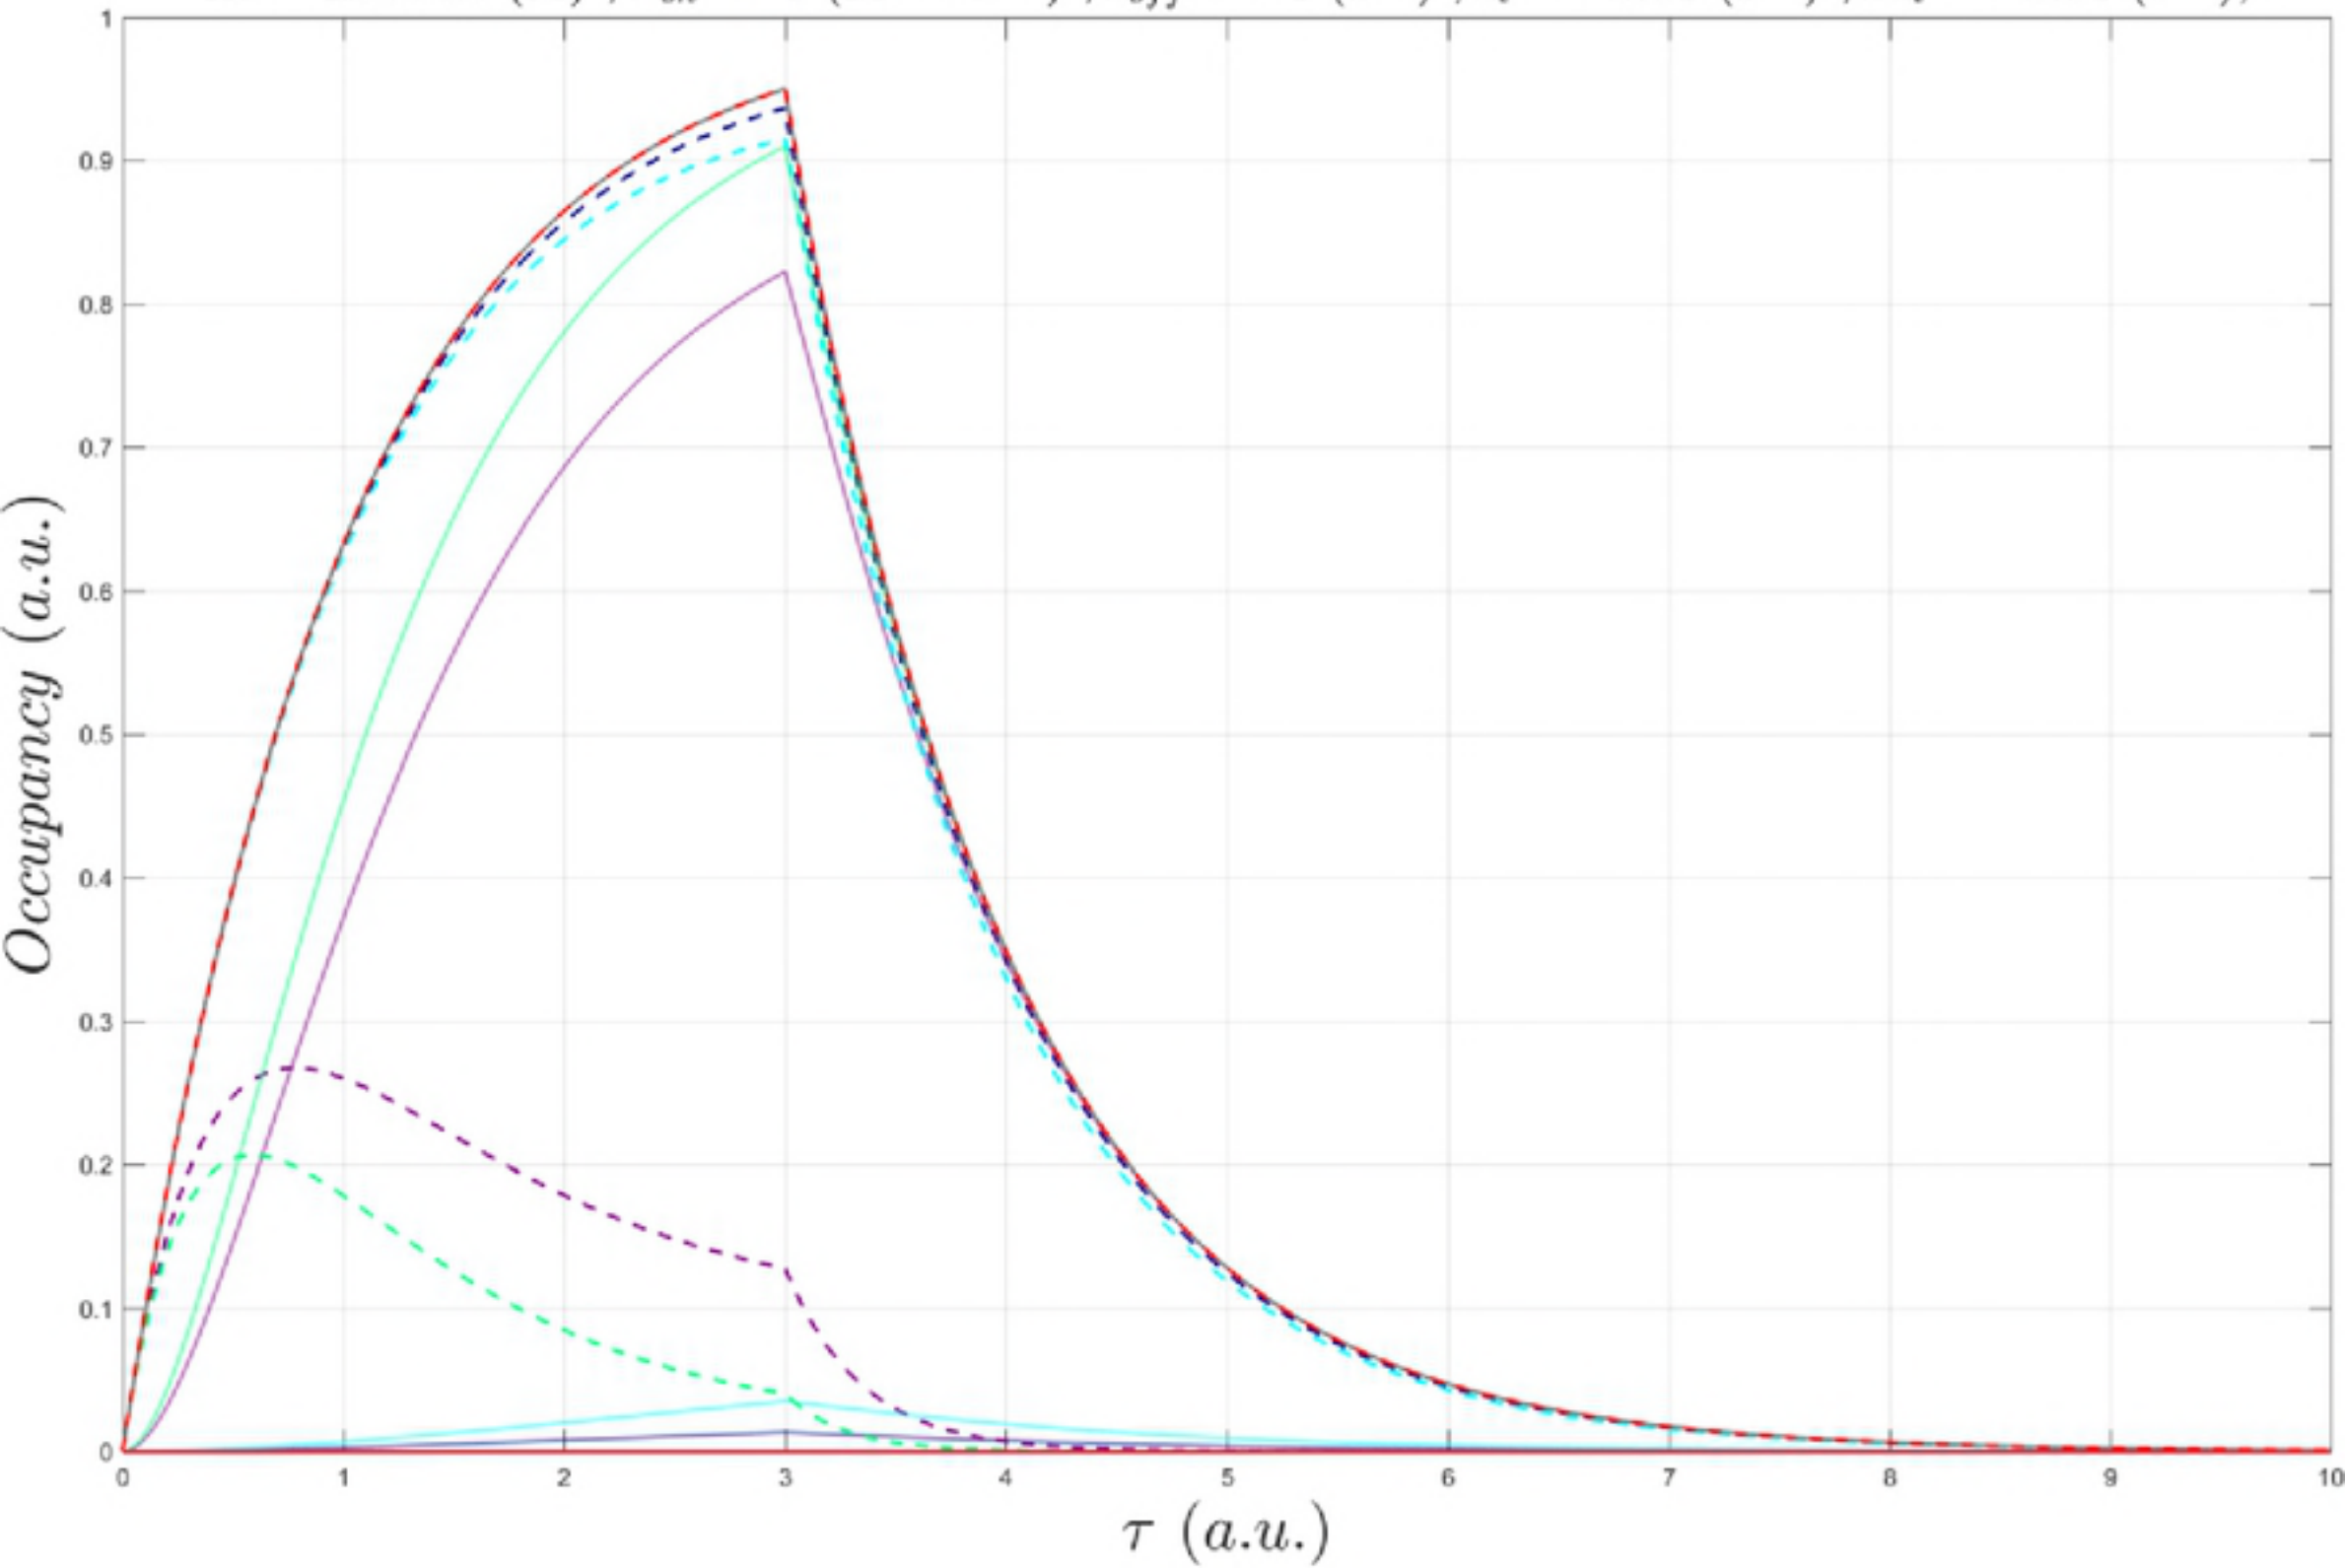

Fraction bound

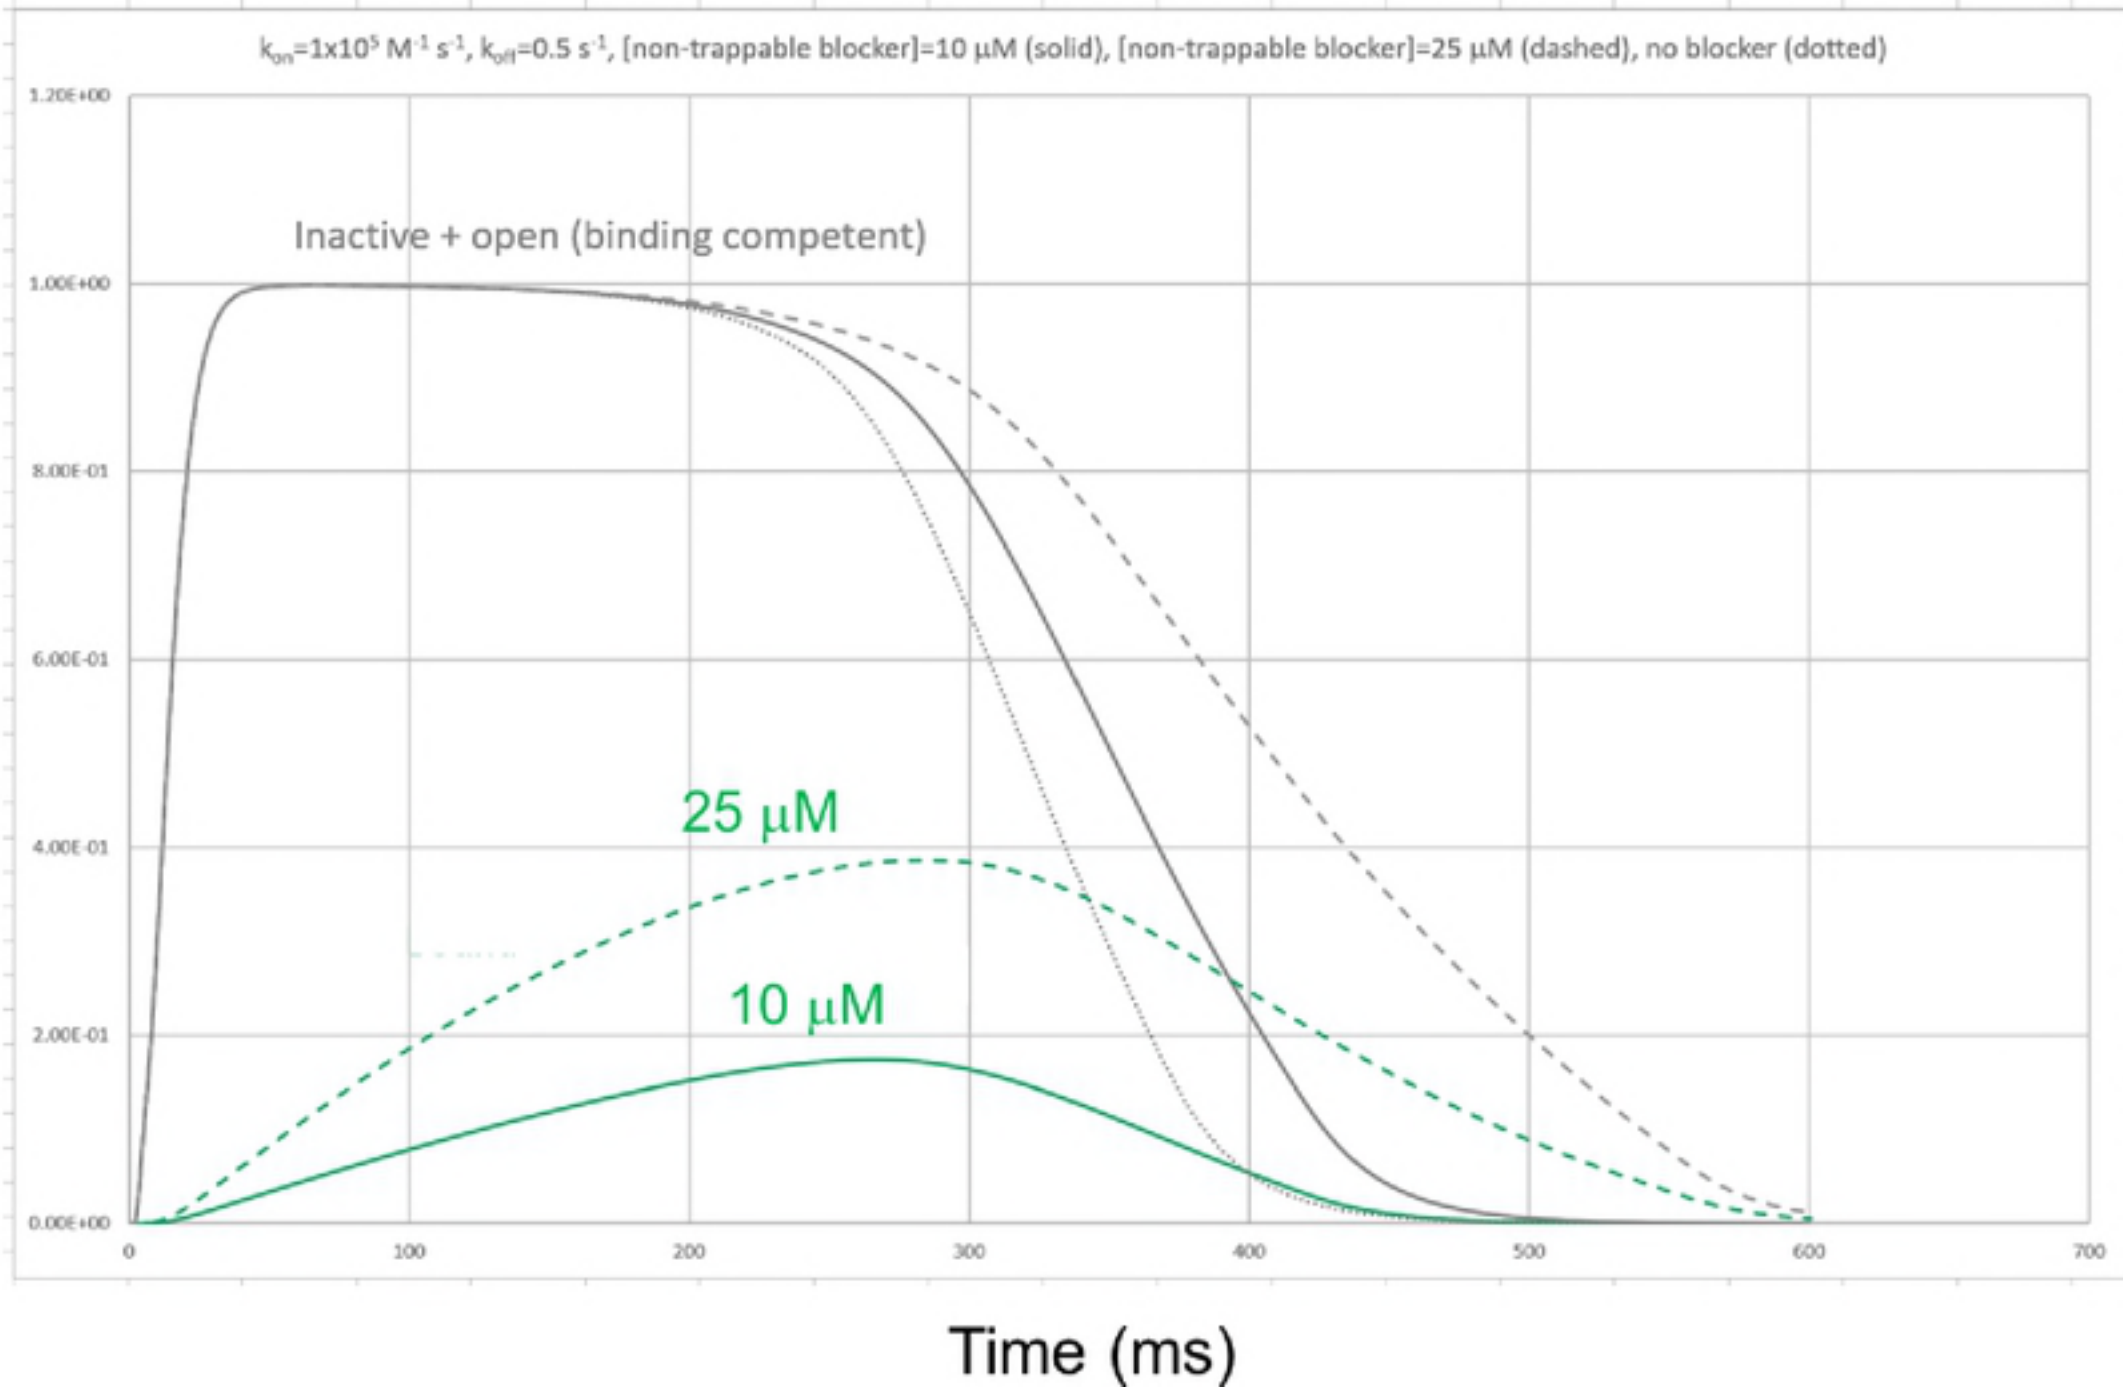

$k_{on} = 10^5 (M^{-1} \cdot s^{-1}) ; k_{off} = 10^{-0.30103} (s^{-1}) ; k_i = 10^{1.1139} (s^{-1}) ; k_{-i} = 10^{0.32222} (s^{-1}) ;$

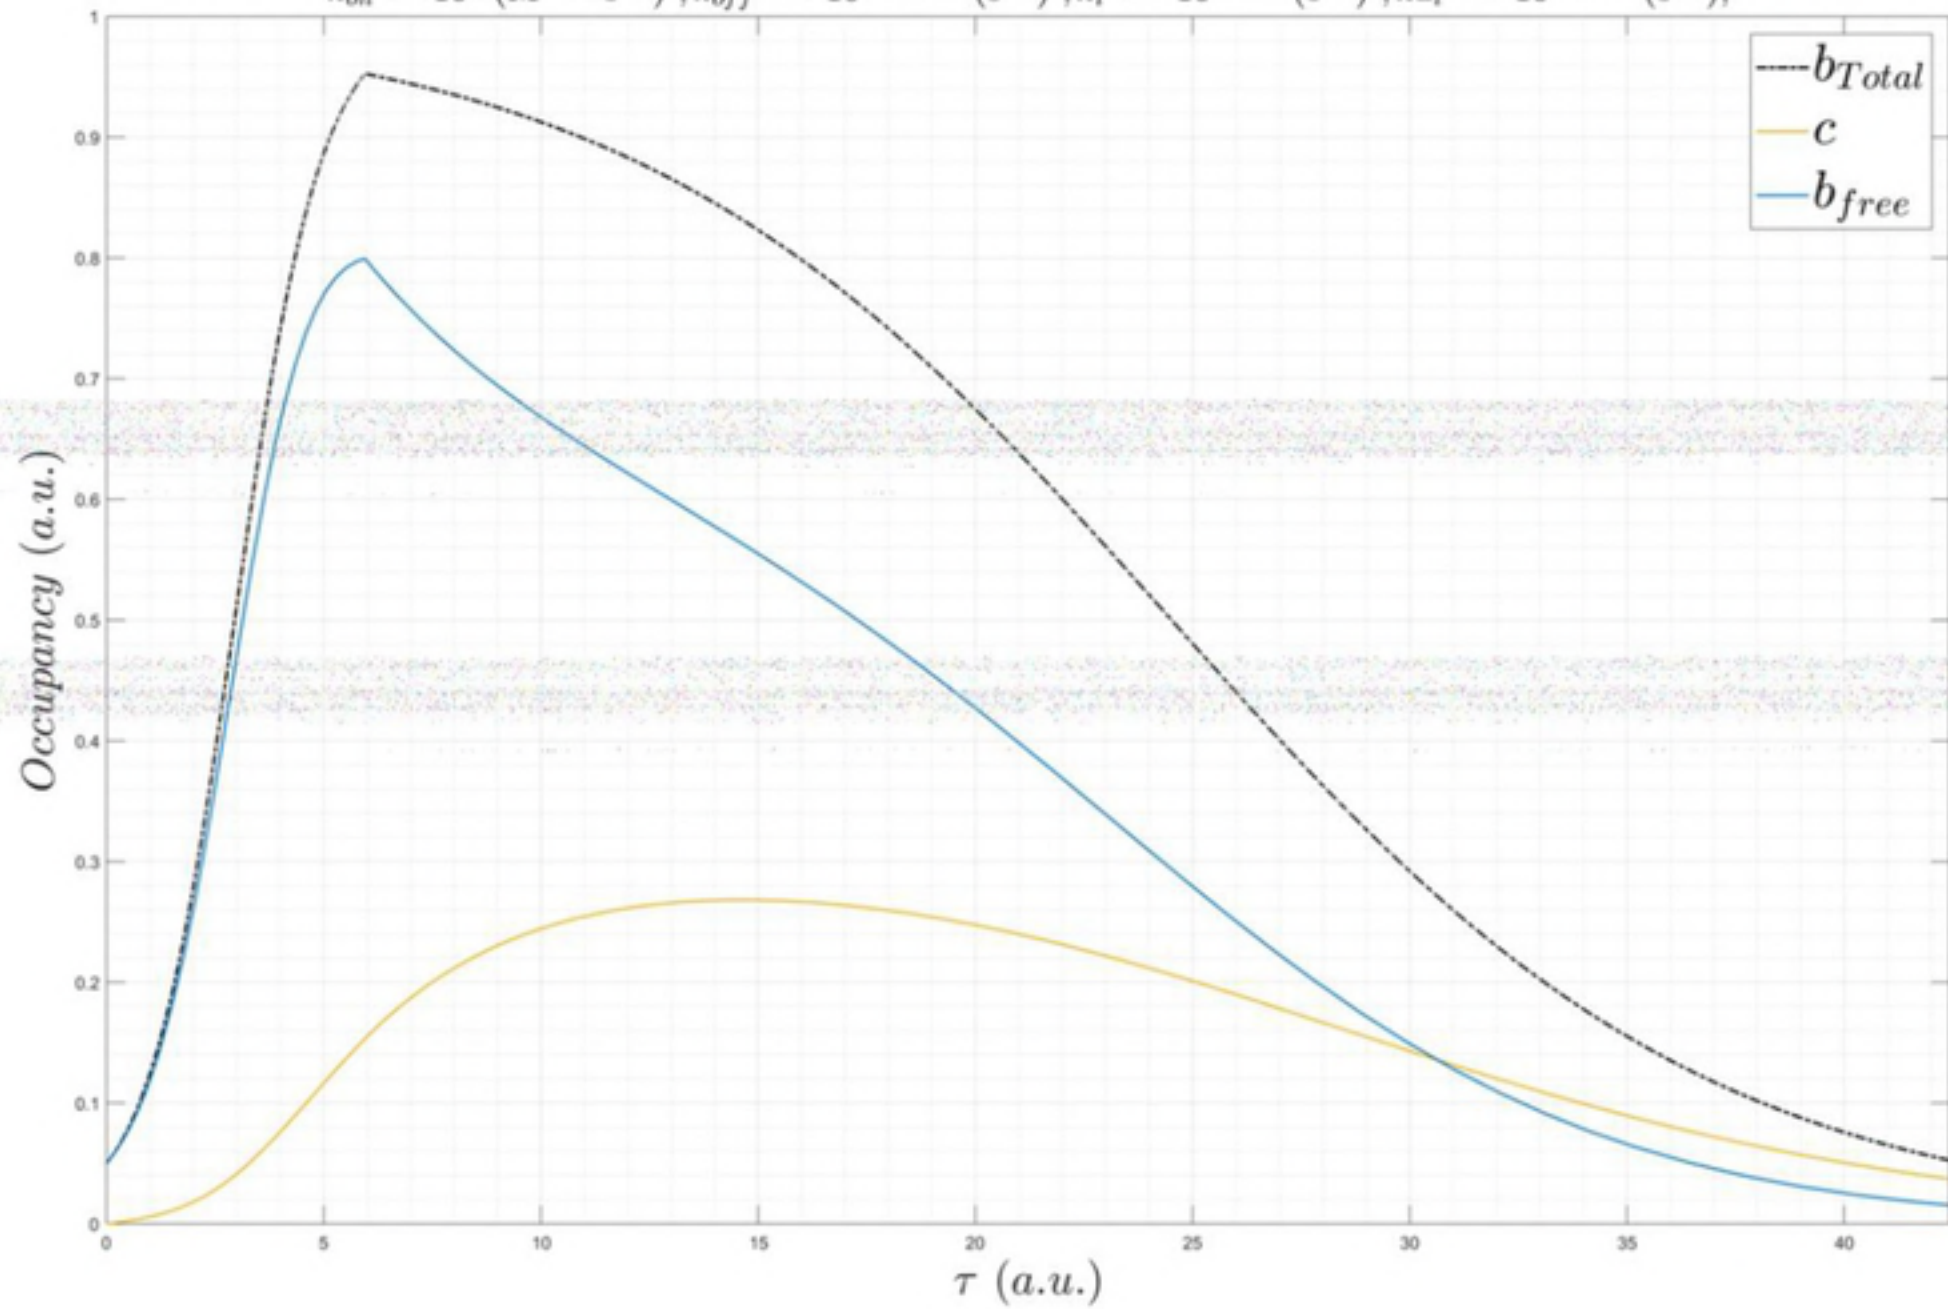

[free drug] in target compartment

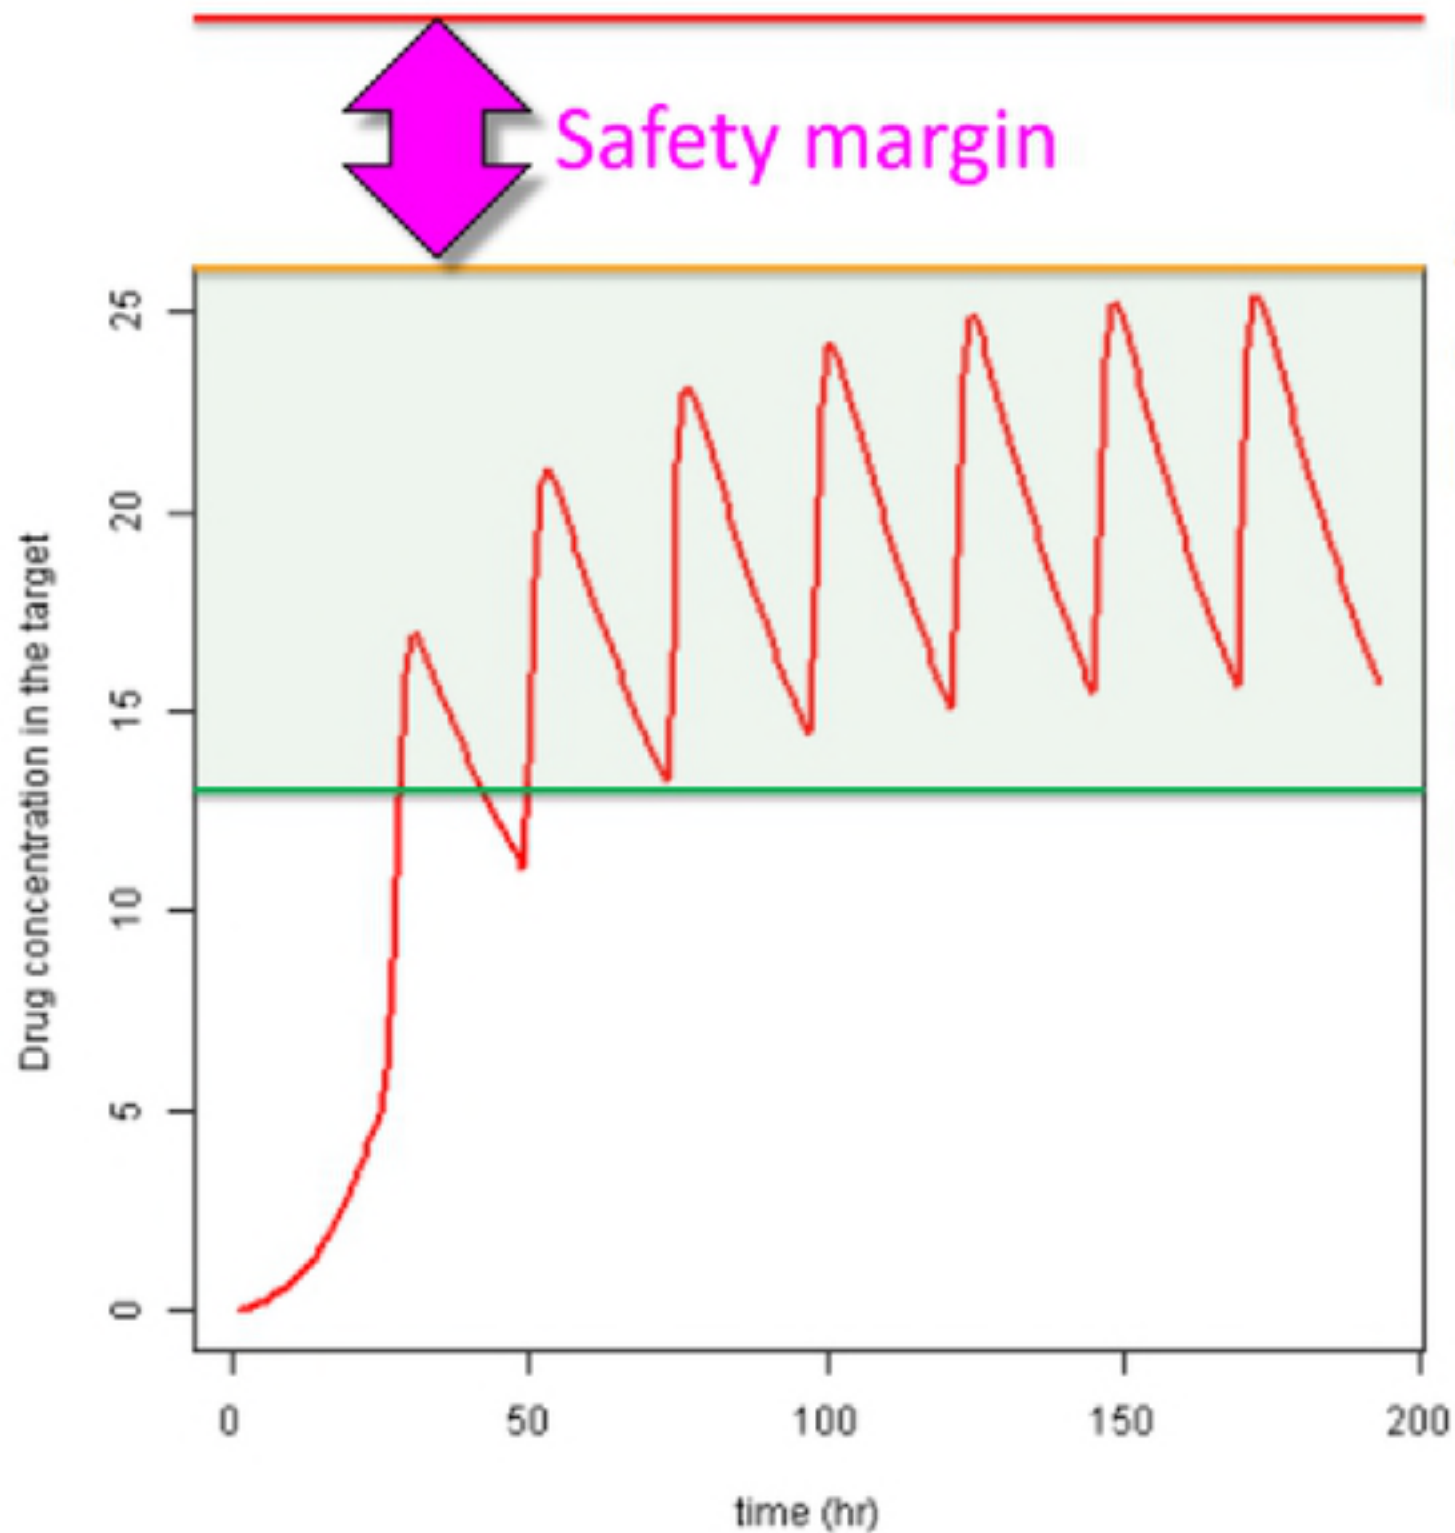

Toxic  
 $[free\ drug]_t$

Safe upper limit  
of  
 $[free\ drug]$

Efficacious  
 $[free\ drug]_e$





$L_0 = 5e-10$  (M) ;  $k_{on} = 100000000$  ( $M^{-1} \cdot s^{-1}$ ) ;  $k_{off} = 0.1$  ( $s^{-1}$ ) ;  $k_i = 0.001$  ( $s^{-1}$ ) ;  $k_{-i} = 0.001$  ( $s^{-1}$ ) ;

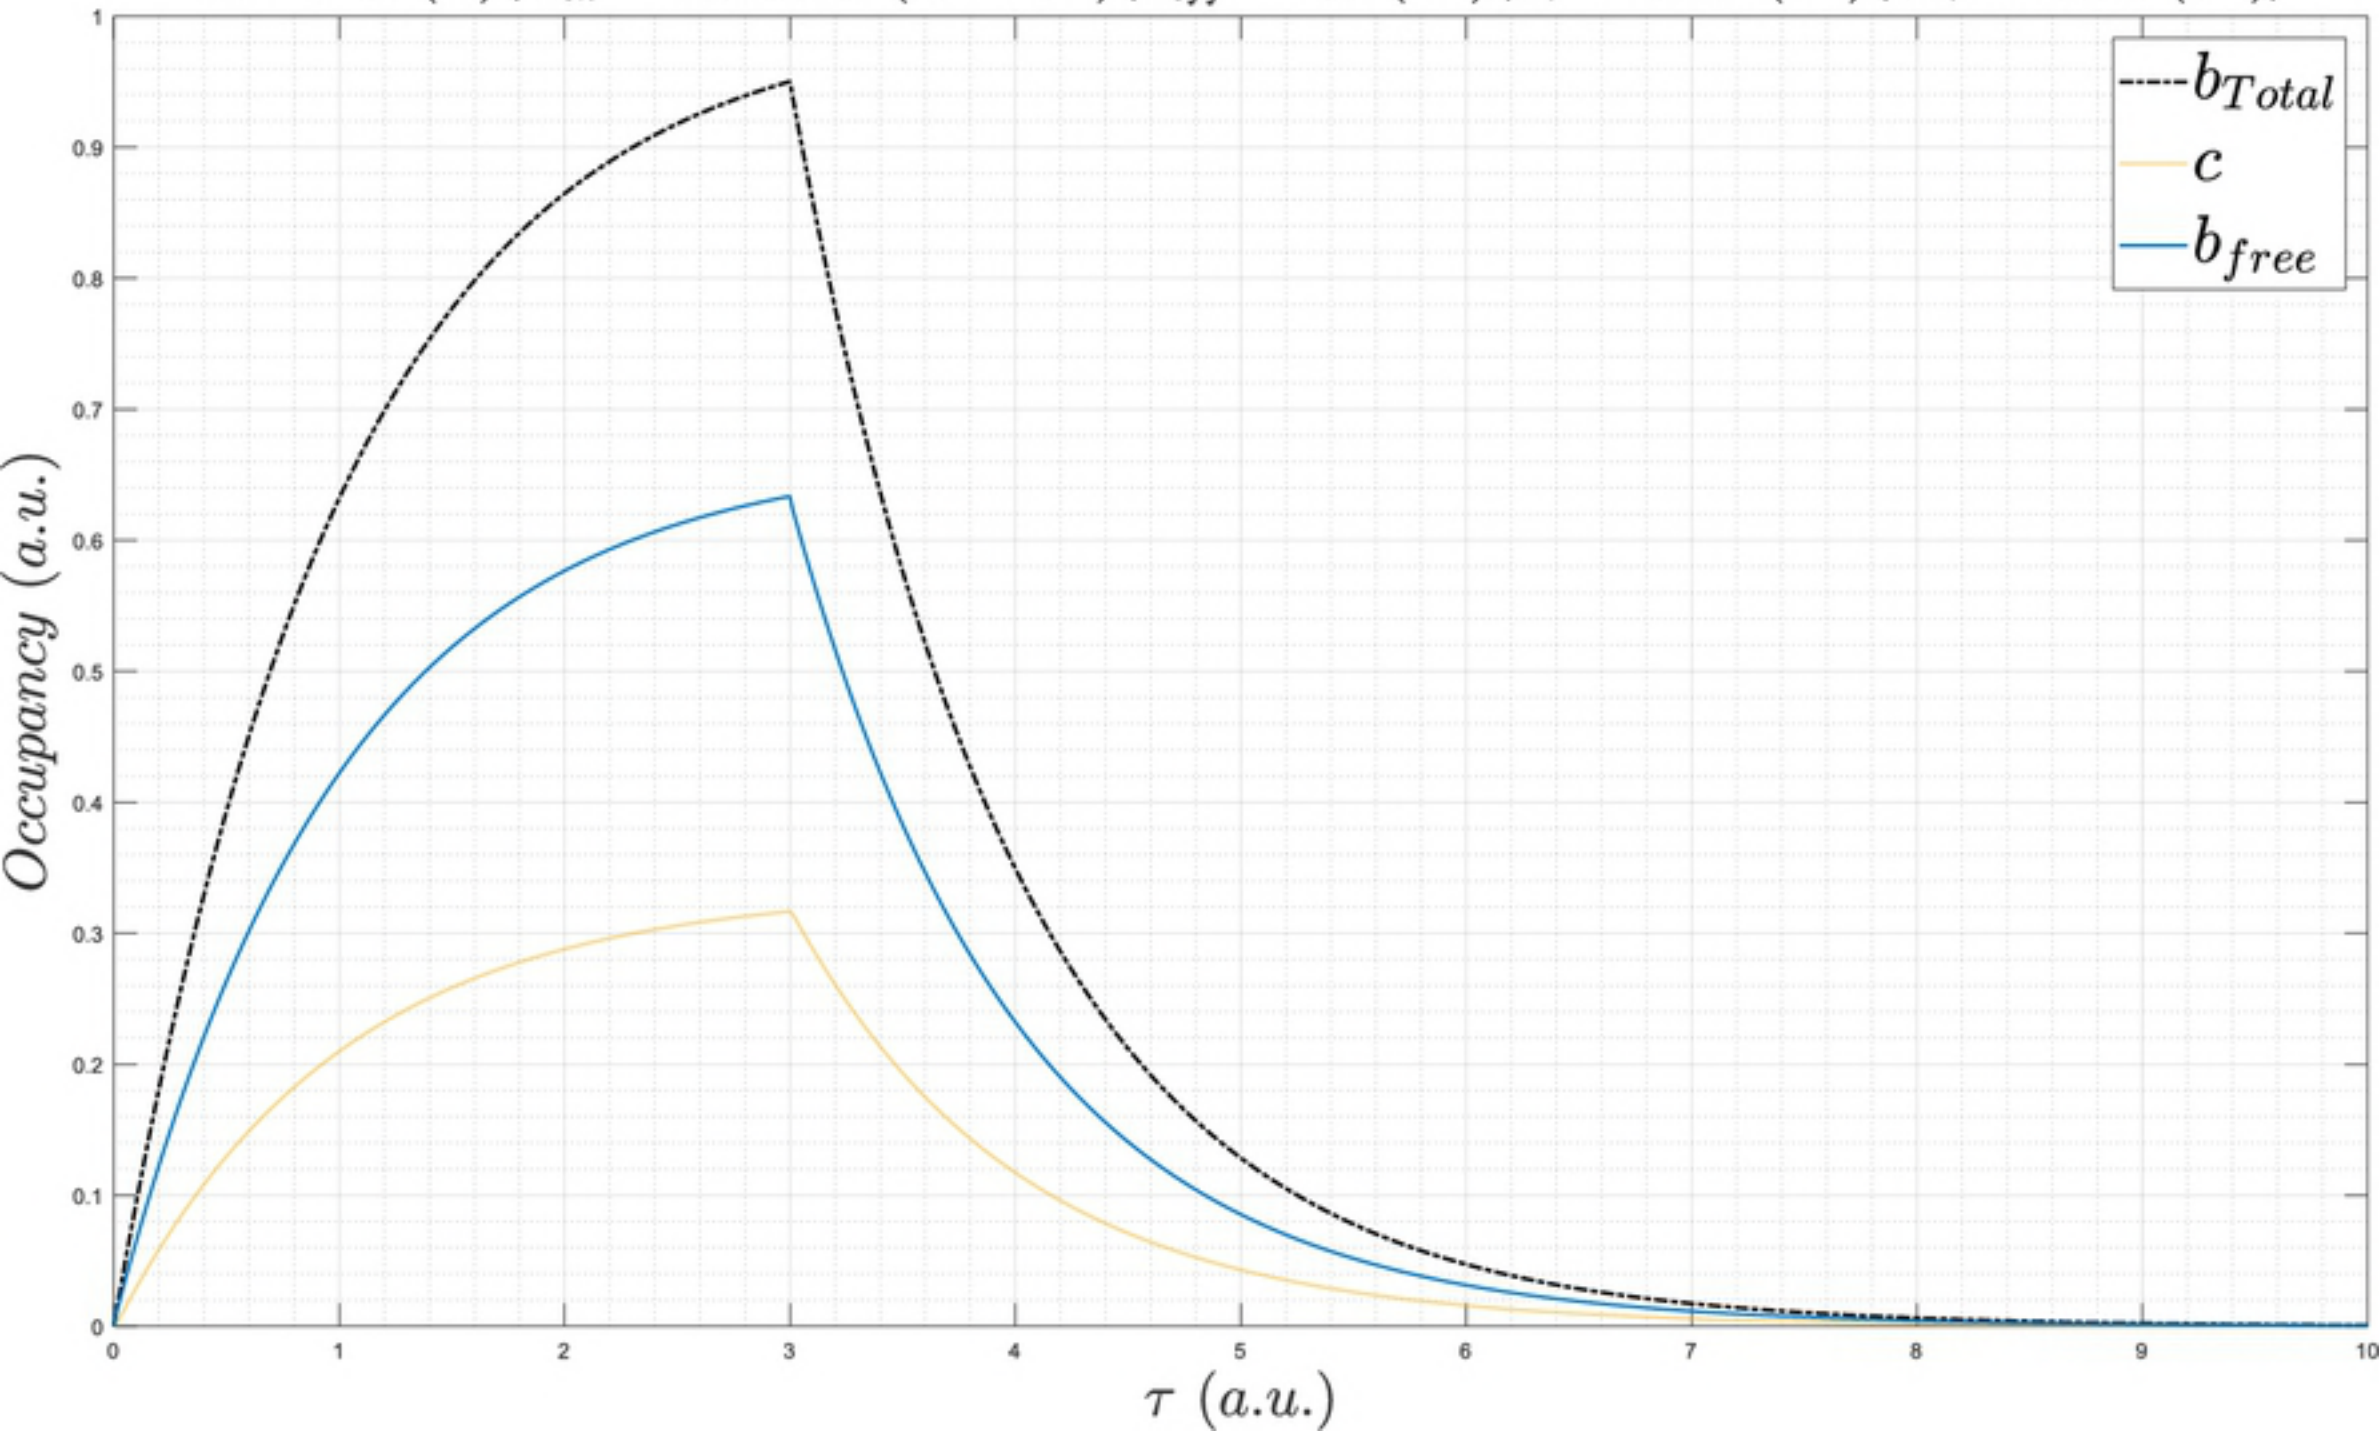

$Lo = 1e-09$  (M) ;  $k_{on} = 300000$  ( $M^{-1} \cdot s^{-1}$ ) ;  $k_{off} = 0.0003$  ( $s^{-1}$ ) ;  $k_i = 0.001$  ( $s^{-1}$ ) ;  $k_{-i} = 0.001$  ( $s^{-1}$ ) ;

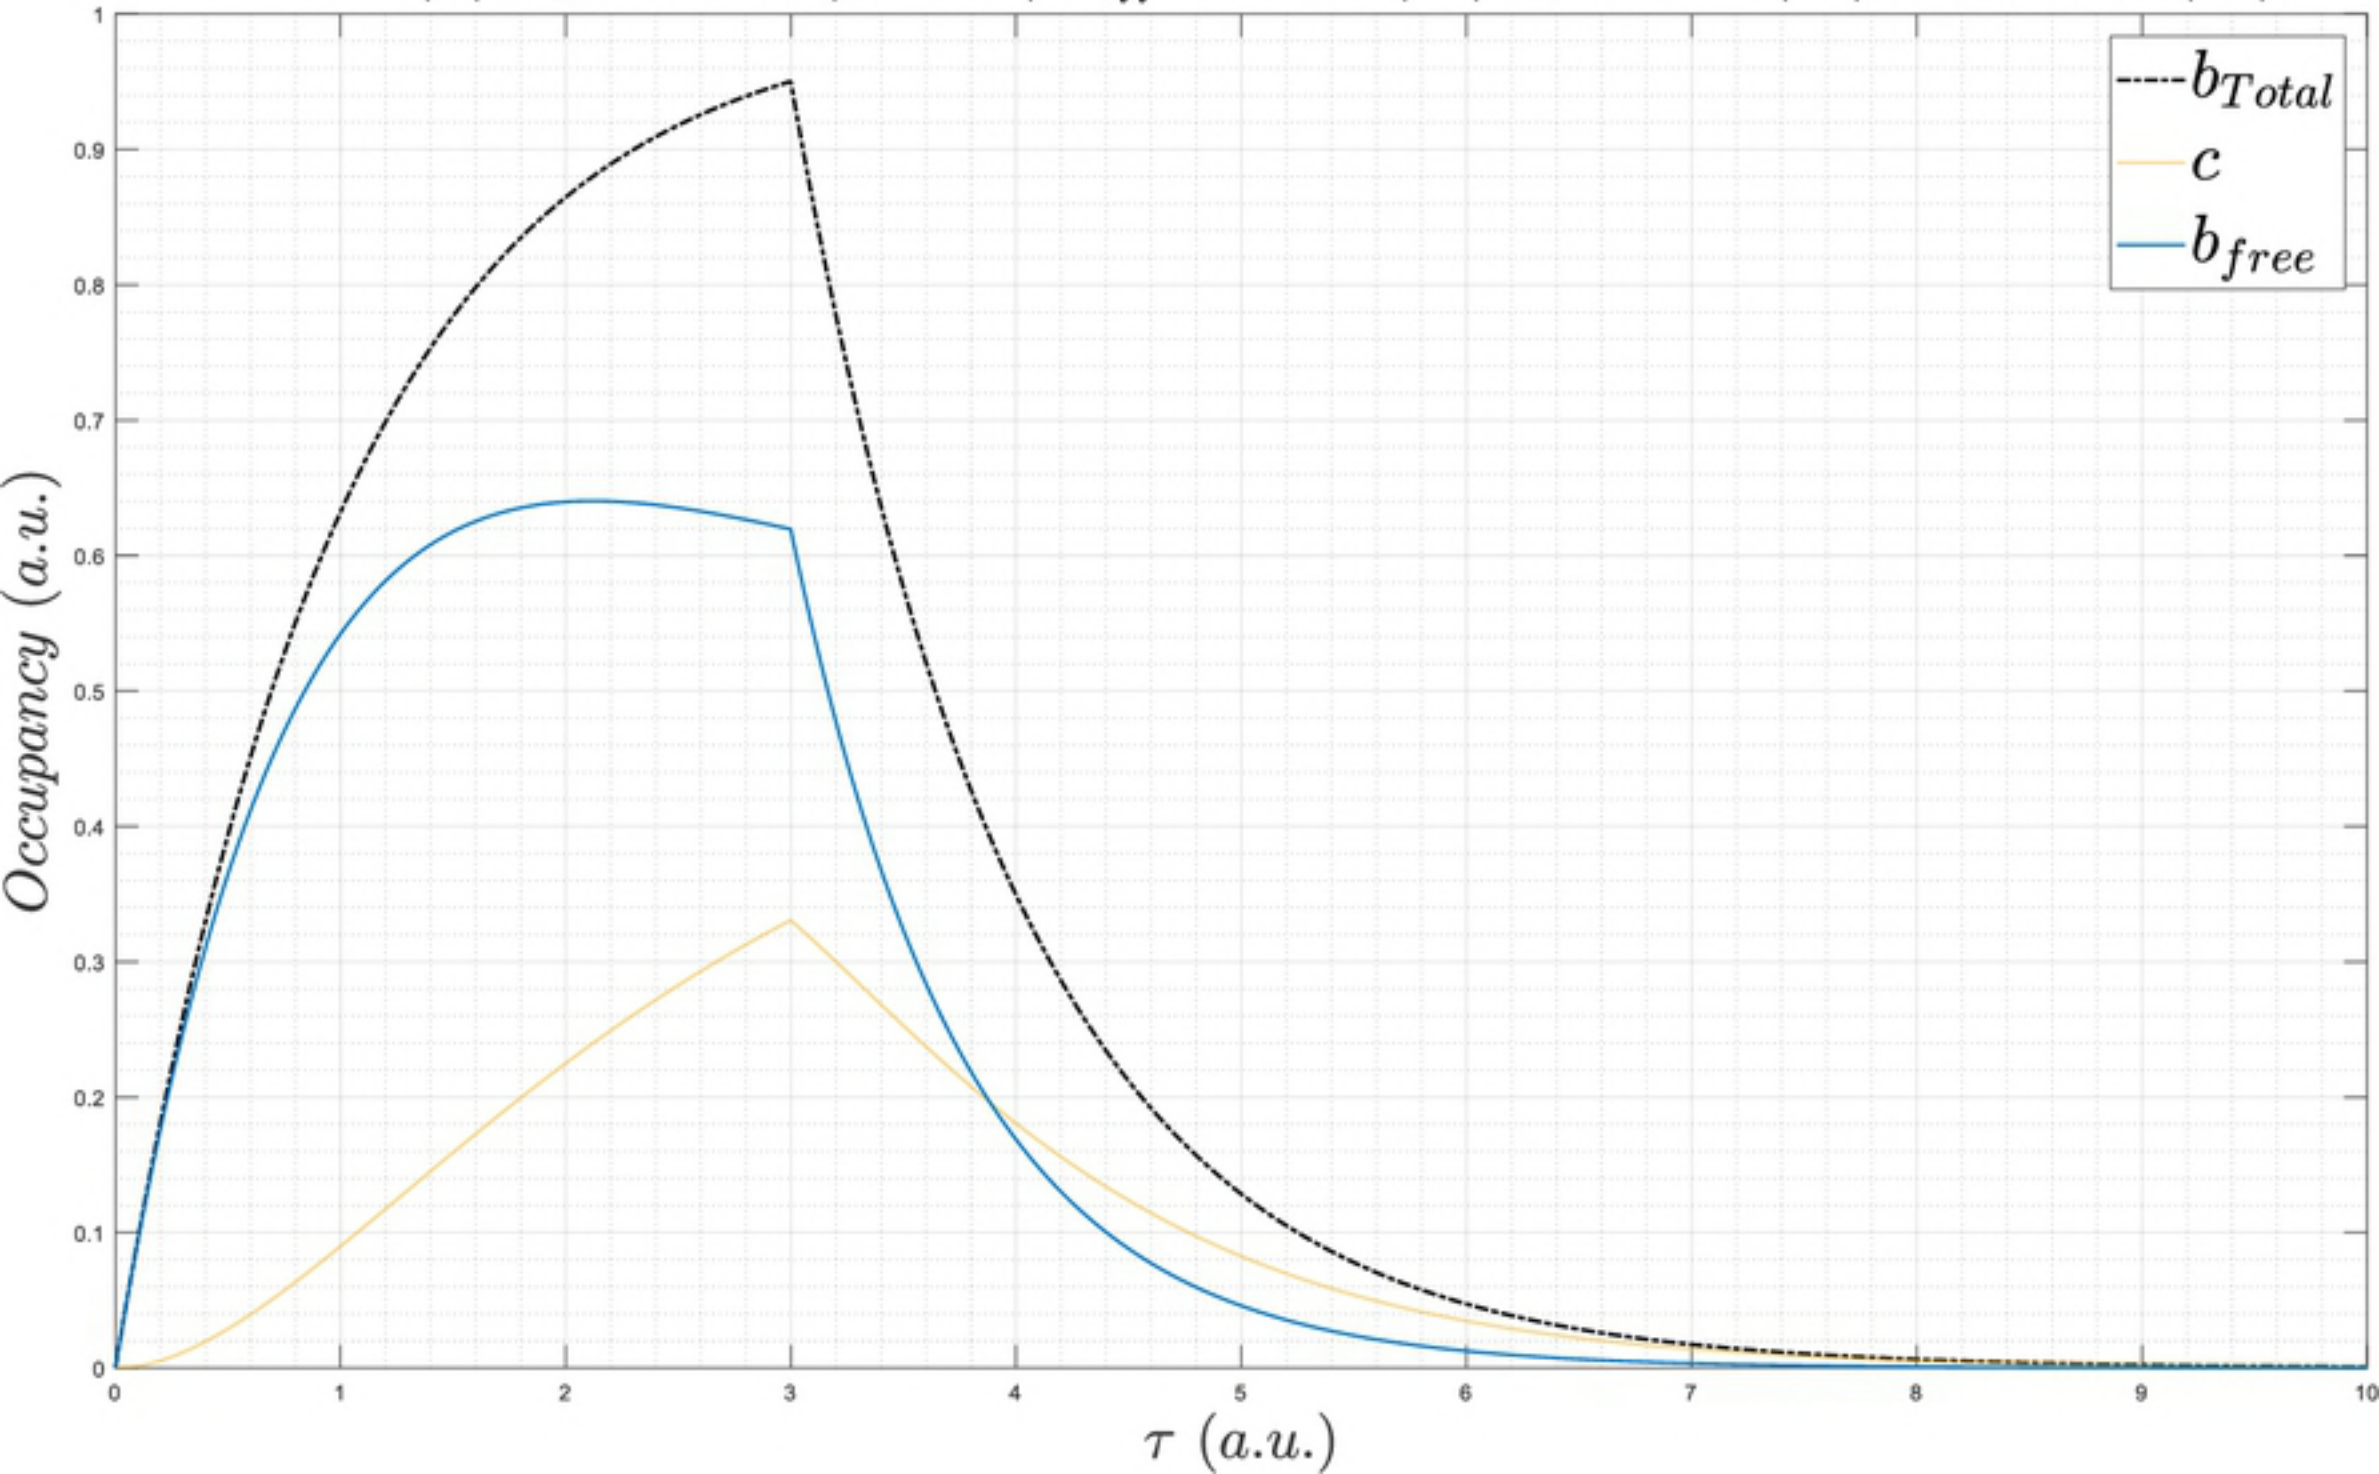



$L_0 = 1e-09$  (M) ;  $k_{on} = 10000$  ( $M^{-1} \cdot s^{-1}$ ) ;  $k_{off} = 1e-05$  ( $s^{-1}$ ) ;  $k_i = 0.001$  ( $s^{-1}$ ) ;  $k_{-i} = 0.001$  ( $s^{-1}$ ) ;

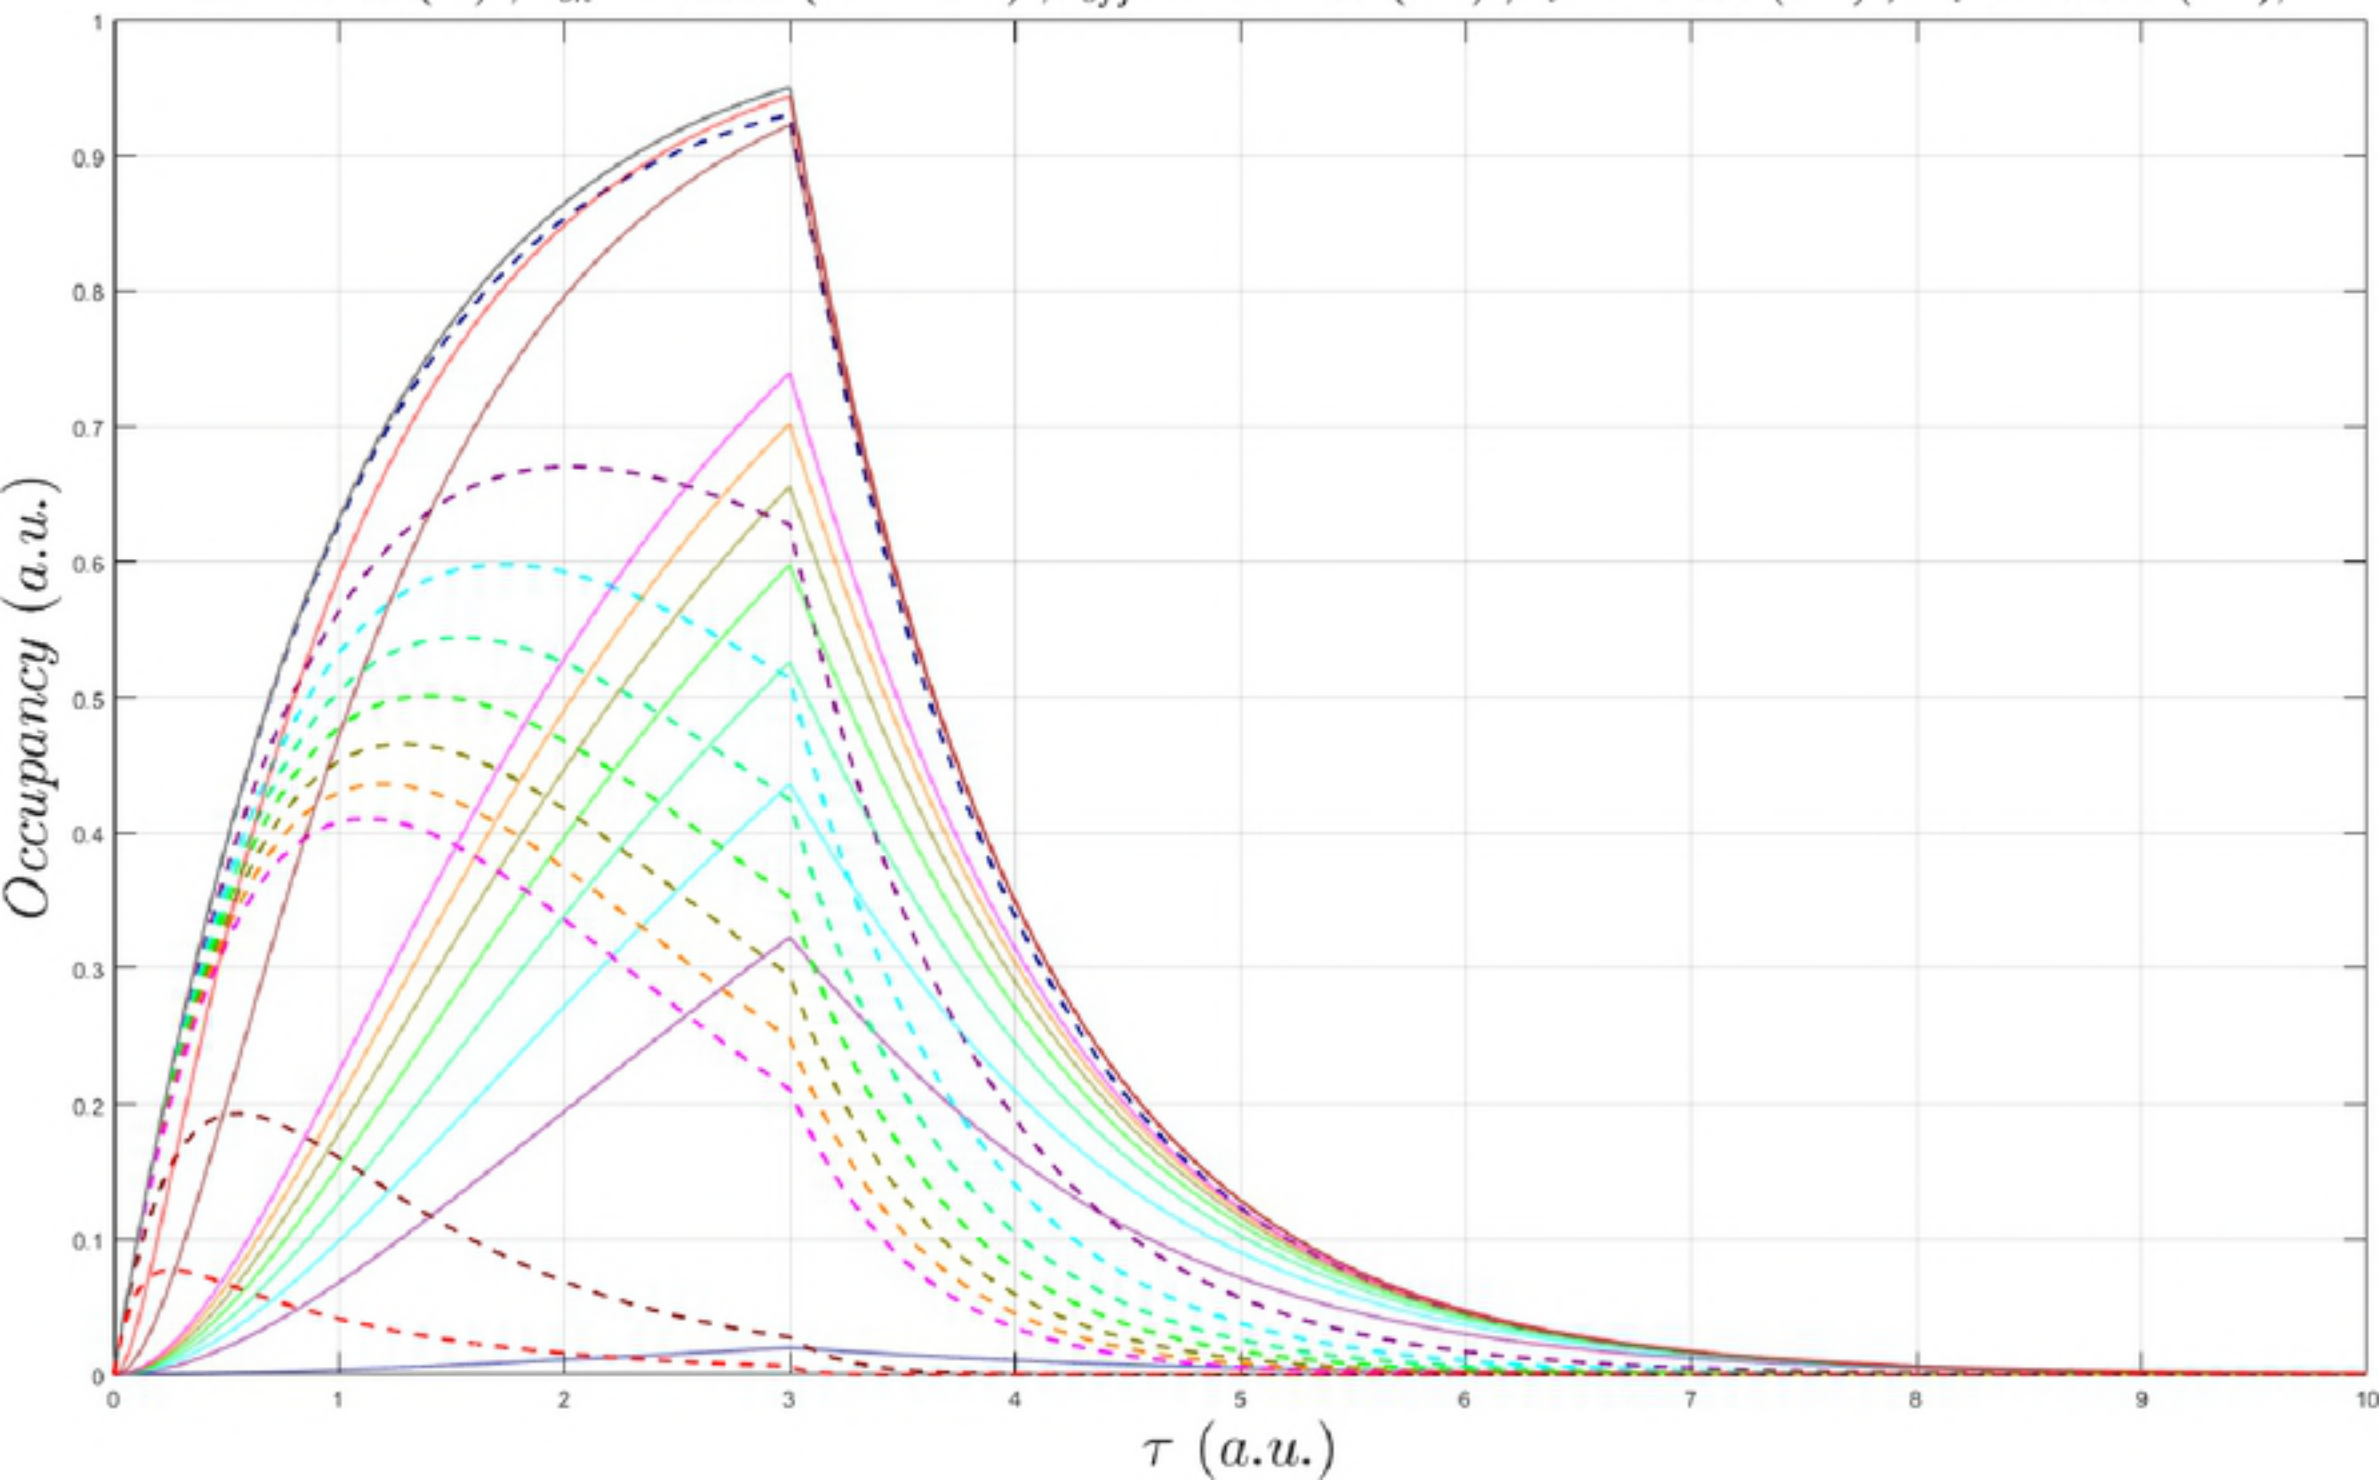

# Rate of binding site buildup ( $k_i$ )

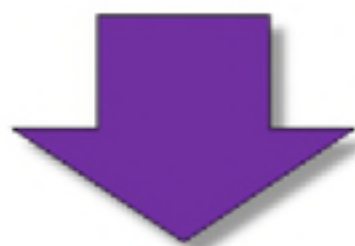

$k_{on} \rightarrow k_{on\_ss}$   
(practical limit  $\sim 10^9$ )

$k_{off}$   
(practical limit  $\sim 10^{-6}$ )

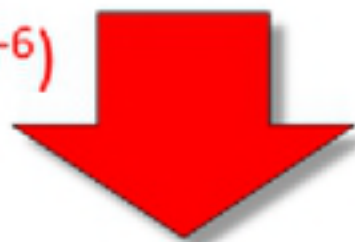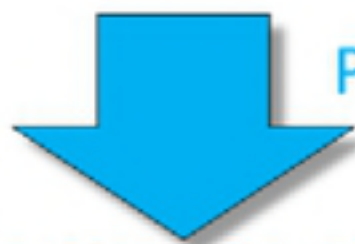

PK

$\min([\text{free drug}])$

# Steady state dynamic occupancy

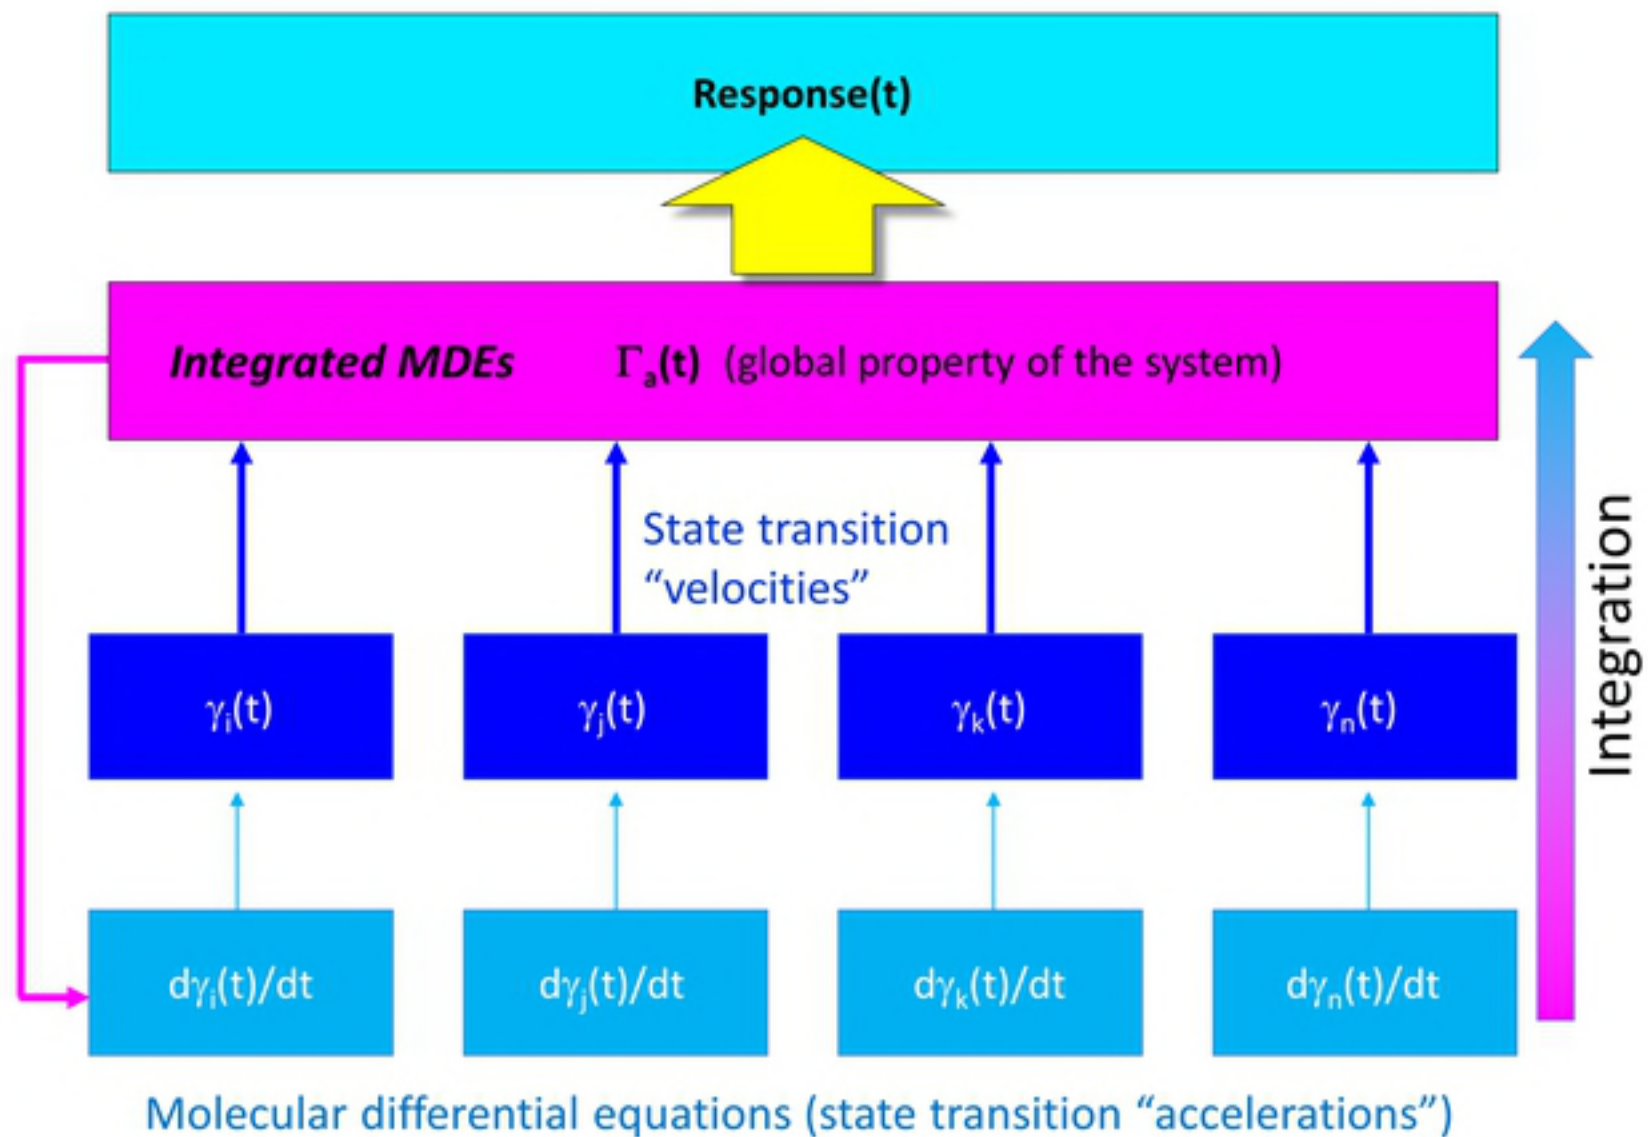

# Biodynamics

## Energy dynamics

Micro-cellular

Macro-cellular

**Molecular  
dynamics**

Cellular  
computing

**Binding  
dynamics**

**Cellular  
dynamics**

**Dynamic occupancy**

**Pharmacodynamics**

**Function**

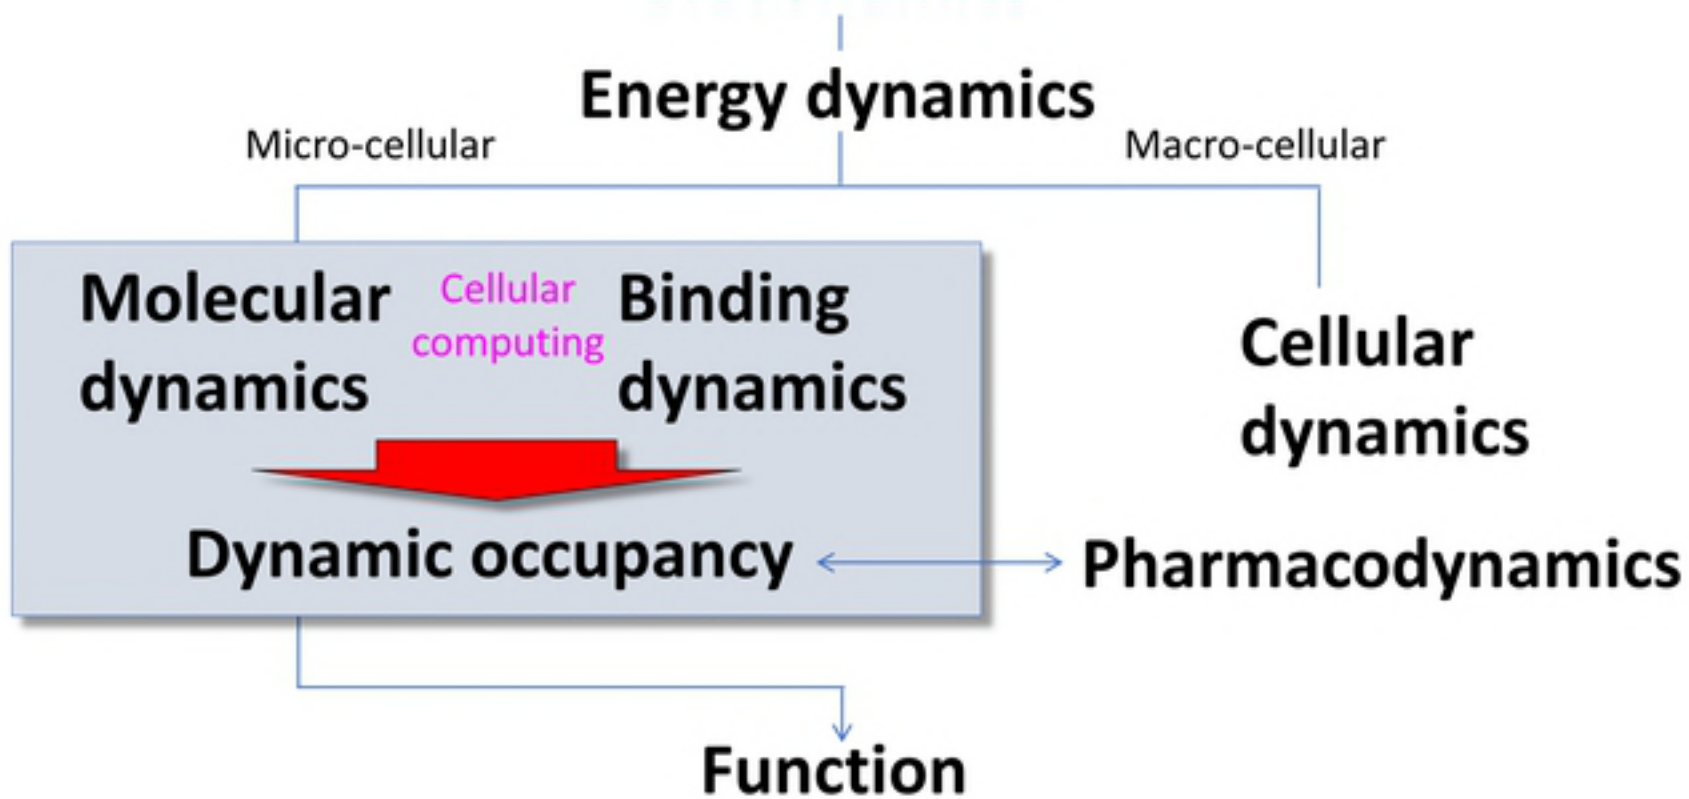

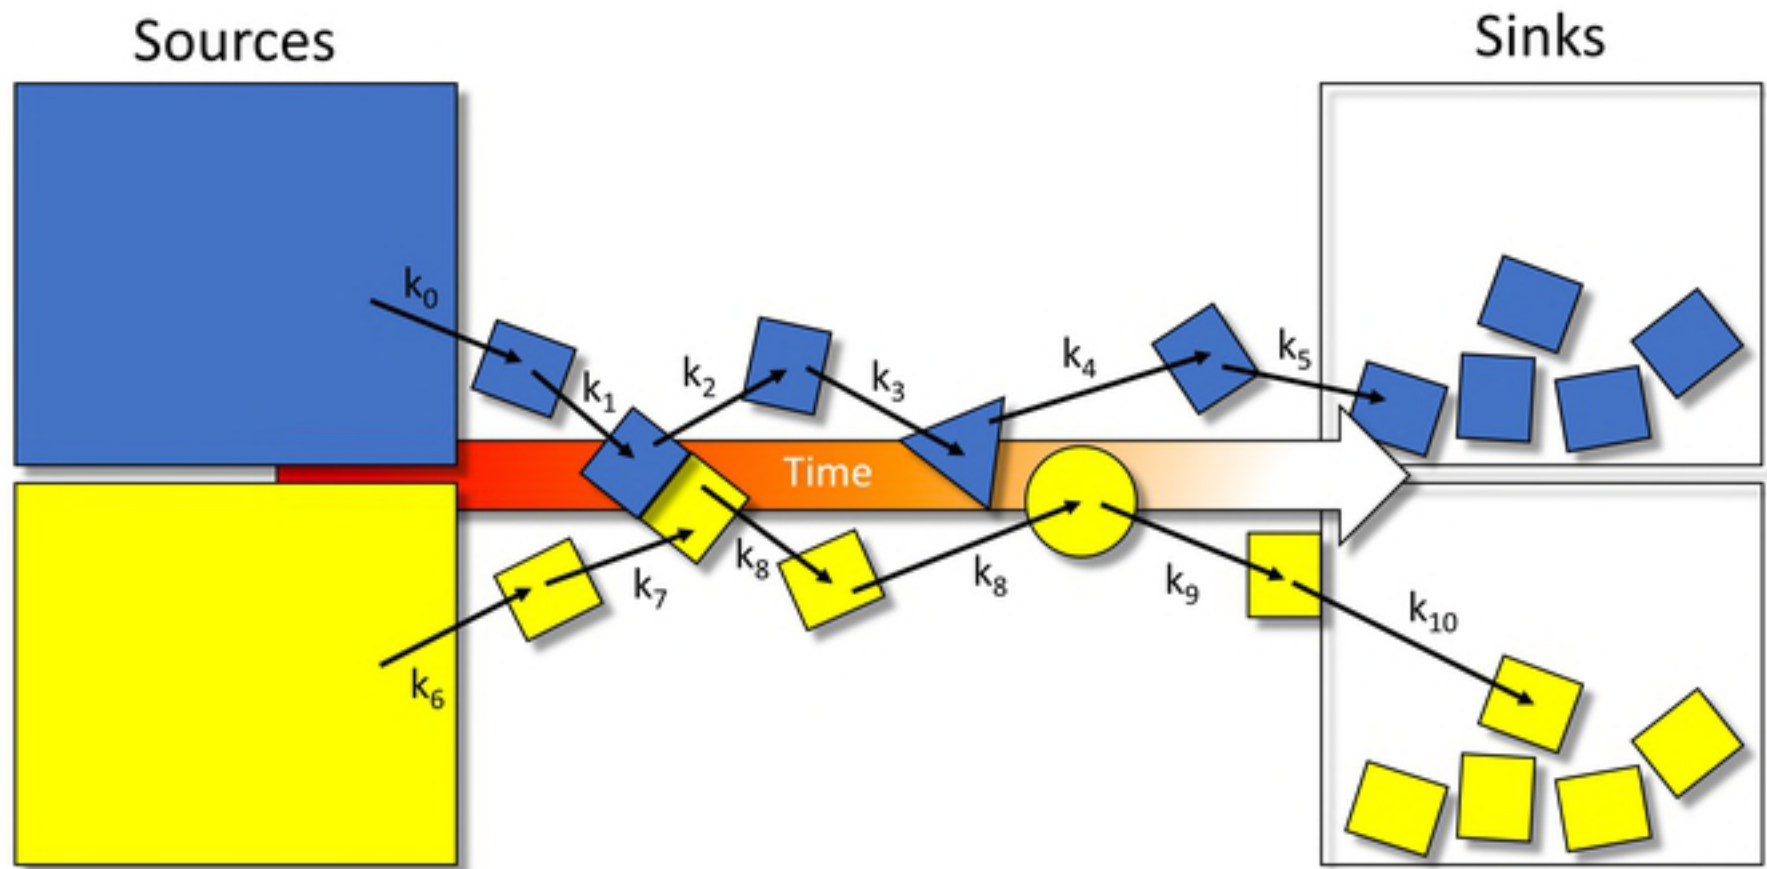

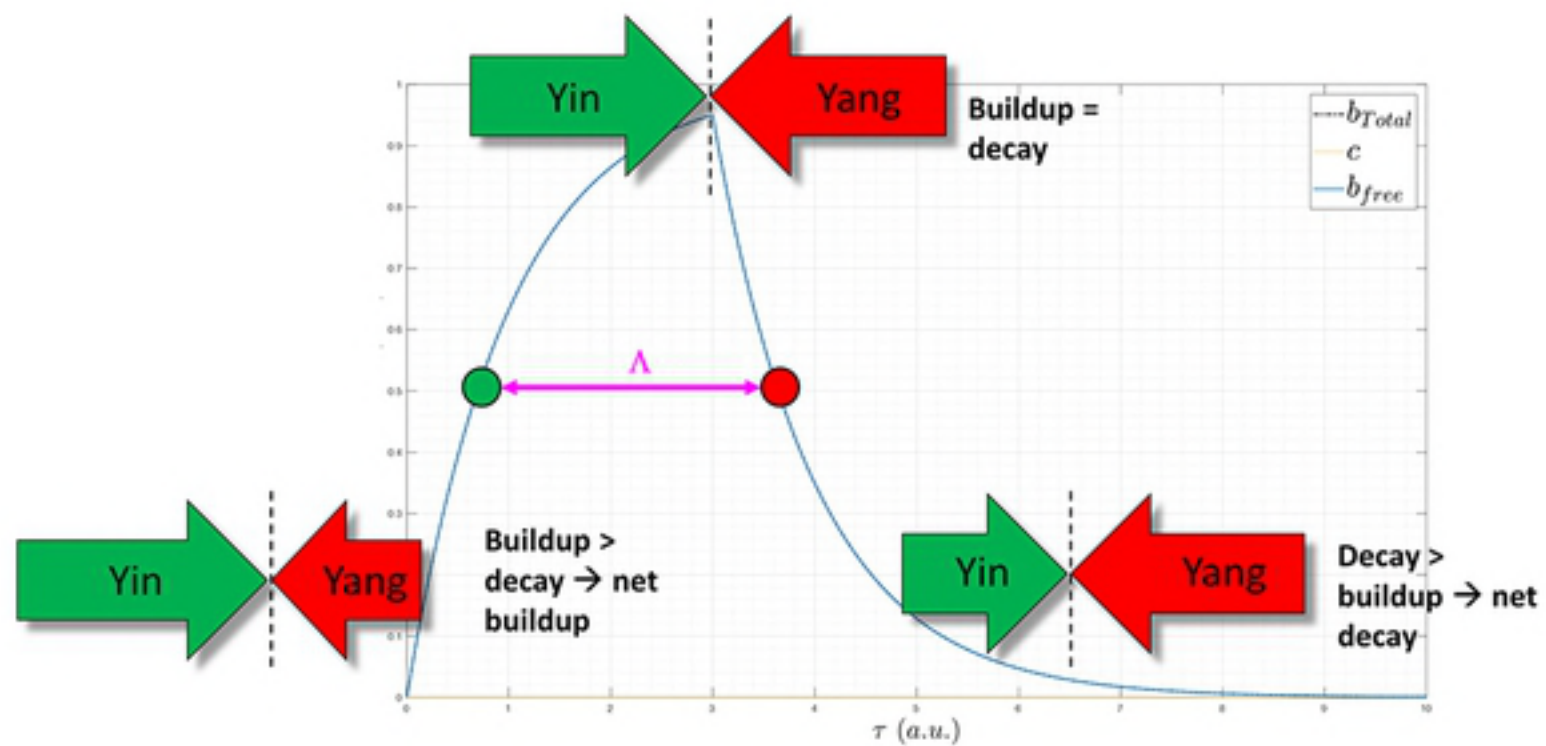



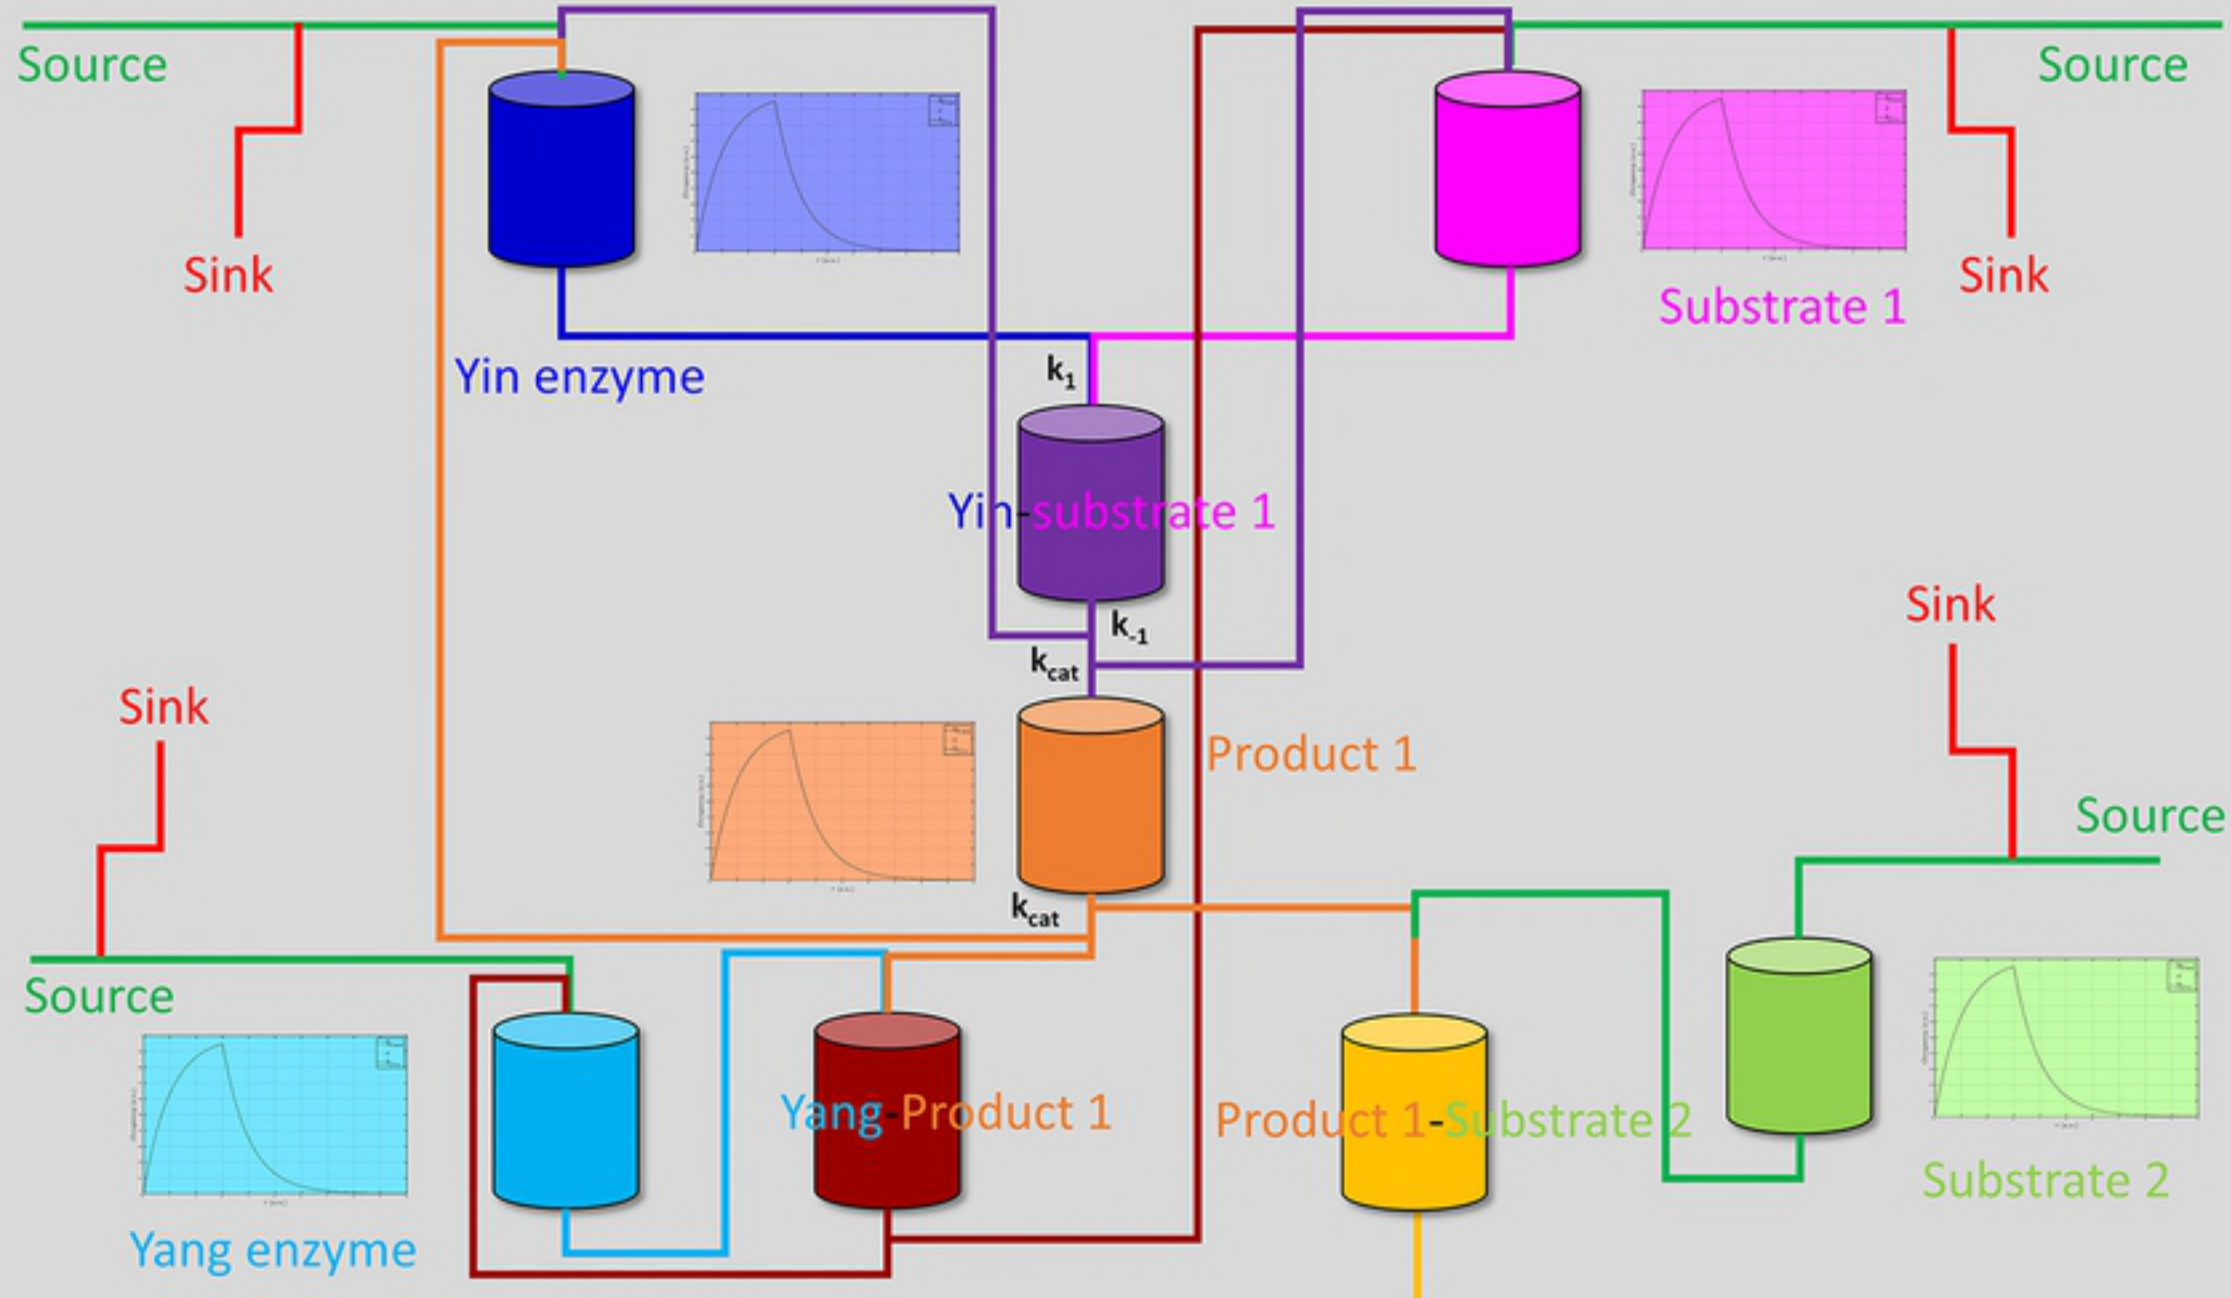



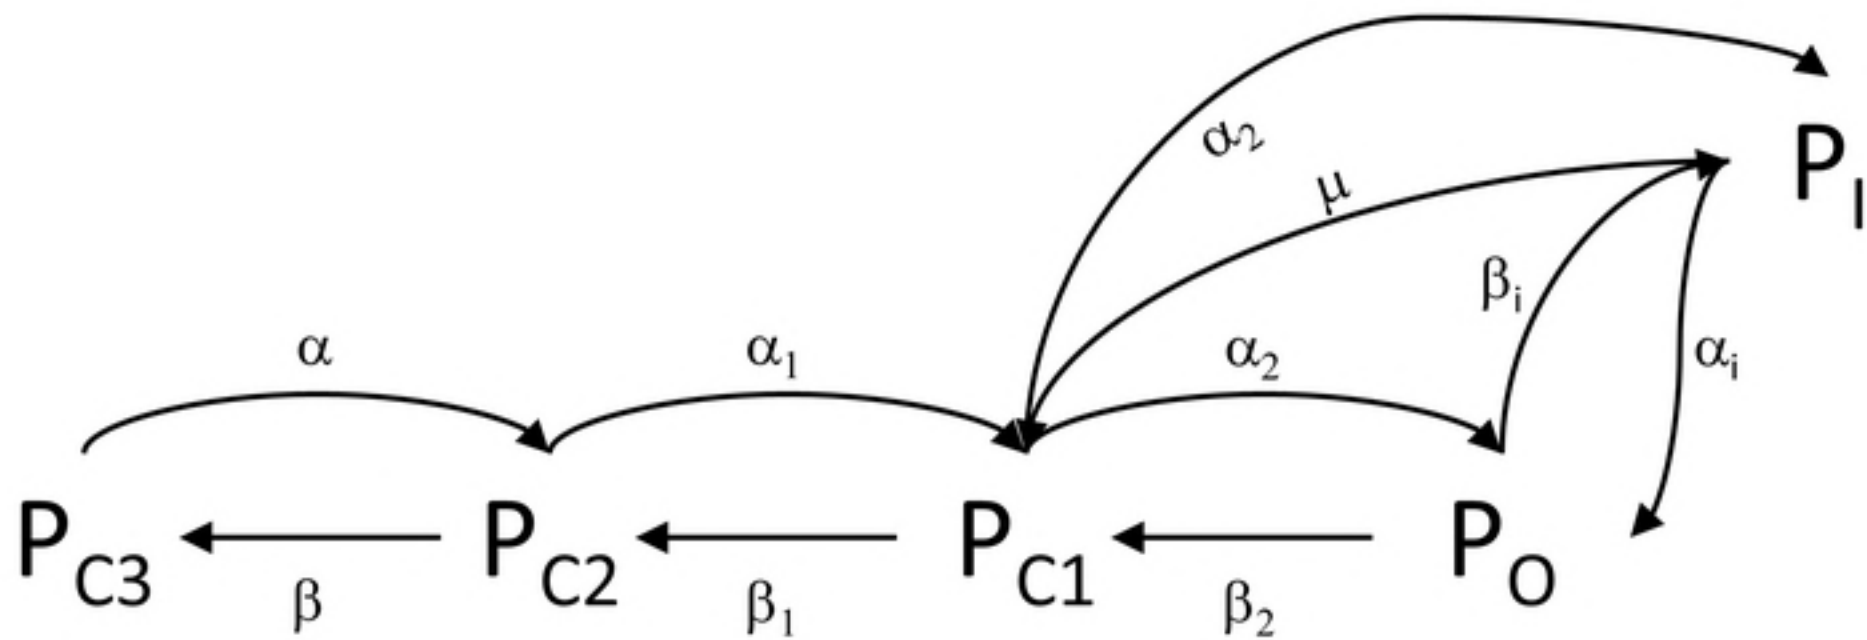

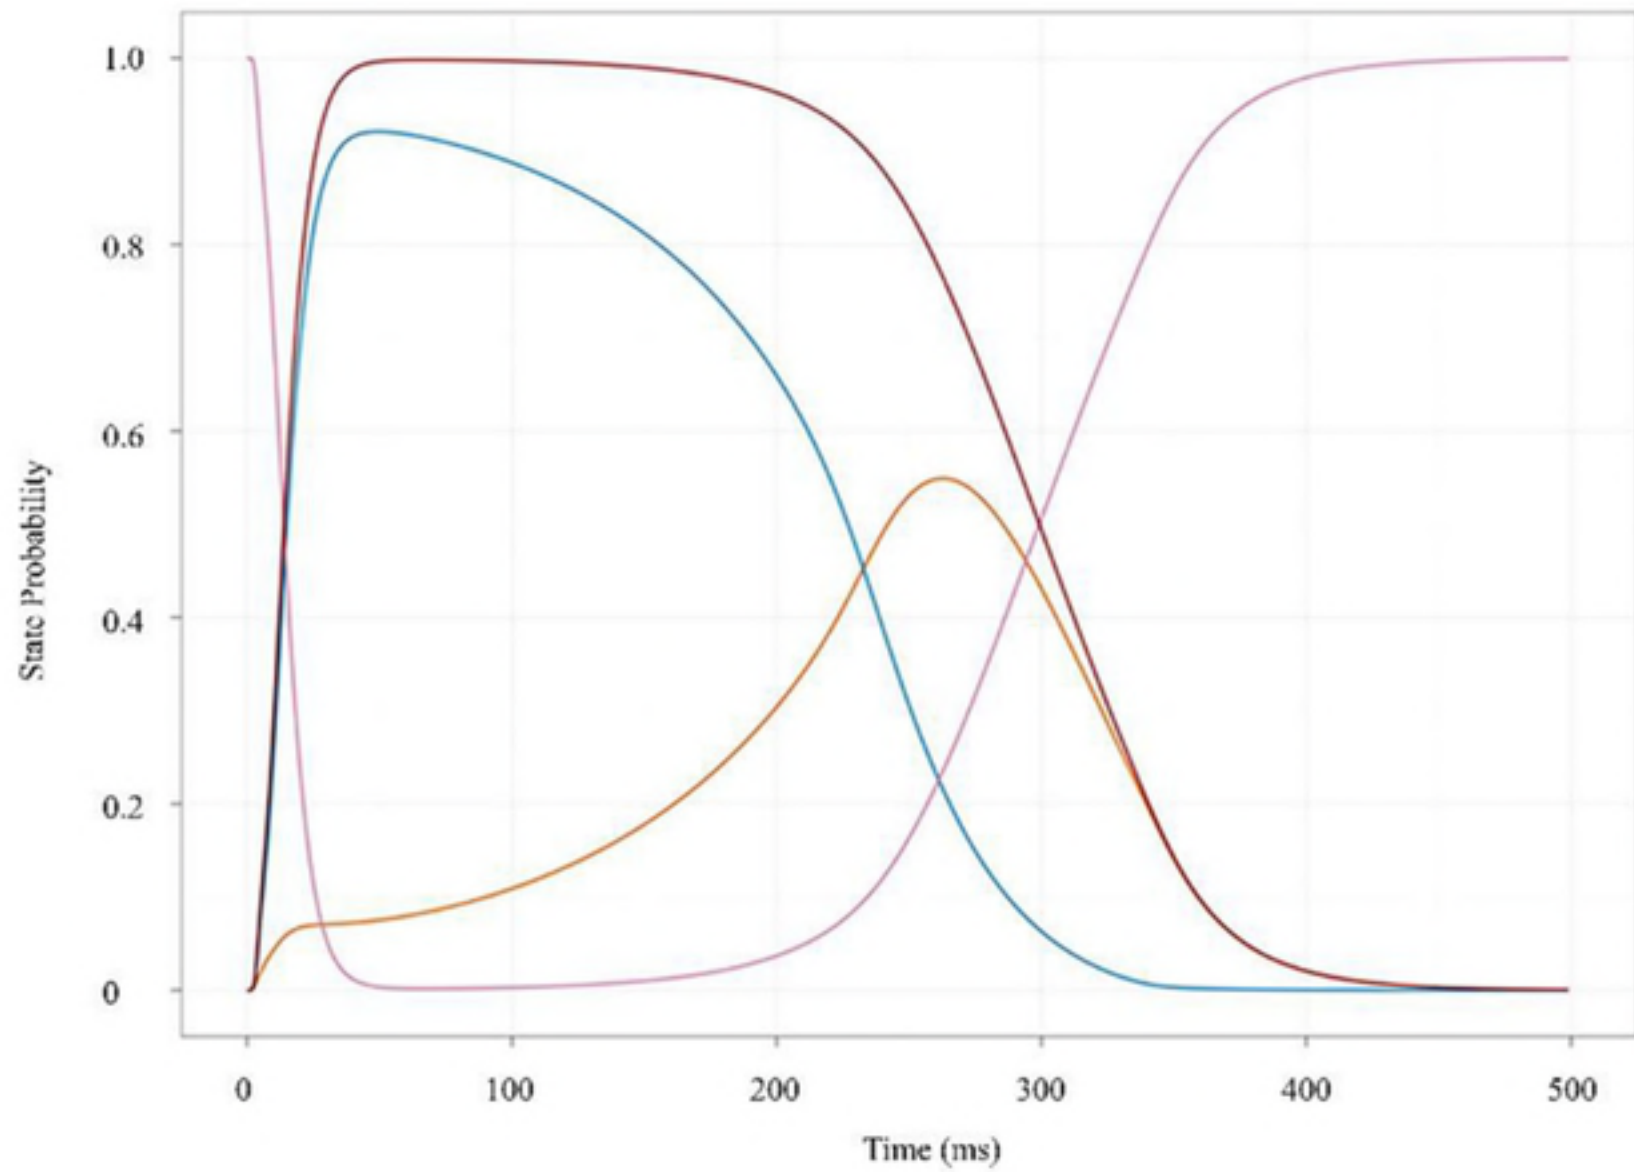

Source: https://www.biorxiv.org/content/10.1101/384719v1.full.pdf
